# Supplementary material for: Cu(i)/sucrose-catalyzed hydroxylation of arenes in water: the dual role of sucrose
Source: Royal Society of Chemistry journal article supplement (doi:10.1039/d0ob01683g), 2020-01-01

*Supporting Information for*

**Cu(I)/sucrose-catalyzed hydroxylation of arenes in water:  
the dual role of sucrose**

Kohei Watanabe,\* Mio Takagi, Ayako Watanabe, Shigeo Murata, and Ryo Takita\*

*One-stop Sharing Facility Center for Future Drug Discoveries, Graduate School of Pharmaceutical Sciences, University of Tokyo,  
Hongo 7-3-1, Bunkyo-ku, Tokyo, Japan.*

*e-mail: k-watanabe@mol.f.u-tokyo.ac.jp, takita@mol.f.u-tokyo.ac.jp*

**Contents**

|                                                     |            |
|-----------------------------------------------------|------------|
| <b>1. General</b>                                   | <b>S2</b>  |
| <b>2. Supplementary results of experiments</b>      | <b>S3</b>  |
| <b>3. Supplementary results of DFT calculations</b> | <b>S7</b>  |
| <b>4. Experimental section</b>                      | <b>S18</b> |
| <b>5. Computational details</b>                     | <b>S23</b> |
| <b>6. References</b>                                | <b>S85</b> |
| <b>7. Copies for NMR spectra</b>                    | <b>S87</b> |

## 1. General

NMR spectra were obtained on a Bruker AVANCE HD 400 spectrometer. Chemical shifts are expressed in  $\delta$  (ppm) values, and coupling constants are expressed in hertz (Hz).  $^1\text{H}$  NMR spectra were referenced to the solvent residual signals. The following abbreviations are used: s = singlet, d = doublet, t = triplet, m = multiplet, and br-s = broad singlet. EI mass spectra were recorded on an Agilent 5977B MSD with an Agilent Intuvo 9000GC system. The major signals are quoted in m/z with the relative intensity in parentheses. ESI mass spectra were measured on a Bruker micrOTOF-II. Melting points were measured on a Yamato Melting Point Apparatus MP21-N.

$\text{Cu}_2\text{O}$  ( $\geq 99.99\%$ , trace metals basis, anhydrous) was purchased from Sigma-Aldrich, Inc. Other chemicals were of reagent grade and used as received. Unless otherwise noted, all the reactions were performed in a 10 mL screw cap tube. Thin-layer chromatography was carried out on 0.25 mm Merck silica gel plates (60F-254). Normal-phase column chromatography was performed on a Yamazen Automated Flash system, or performed manually with silica gel 60 (230-400 mesh) from Merck.

## 2. Supplementary results of experiments

### 2-1. Solubility of aryl iodide in water

Procedure for measuring the solubility of aryl iodides in water: *para*-Iodoacetophenone (**1a**, 24.6 mg, 0.1 mmol) and additive (0.05 mmol) were charged in a 10 mL sample tube, and 5 mL of distilled water was added via a syringe. After the mixture was stirred at 80 °C, 1 mL of solution was collected by syringe, quickly transferred to the flask, and evaporated in vacuo. The amount of the 4'-iodoacetophenone in 1 mL of solution was determined by <sup>1</sup>H NMR with dimethylsulfone as an internal standard. All data of solubility were summarized in **Table S1**.

**Table S1.** Solubility of *para*-iodoacetophenone (**1a**) in water

| Entry | Additive (0.5 equiv.)                       | Solubility in water (μmol/mL) |
|-------|---------------------------------------------|-------------------------------|
| 1     | w/o additive                                | n.d.                          |
| 2     | w/o additive <sup>a</sup>                   | 6.8                           |
| 3     | DME                                         | 0.52                          |
| 4     | Diglyme                                     | 0.35                          |
| 5     | TMEDA                                       | 0.46                          |
| 6     | SDS                                         | 6.8                           |
| 7     | Glucose                                     | 1.4                           |
| 8     | Fructose                                    | 1.1                           |
| 9     | Mannose                                     | 0.79                          |
| 10    | α-Methylglucoside                           | 0.79                          |
| 11    | β-Methylglucoside hemihydrate               | 0.40                          |
| 12    | α-Methylgalactoside hydrate                 | 1.07                          |
| 13    | Sucrose                                     | 0.93                          |
| 14    | Trehalose                                   | 1.1                           |
| 15    | Octa- <i>O</i> -methylsucrose <sup>S1</sup> | 0.25                          |

<sup>a</sup> Aqueous ammonia was used as a solvent instead of distilled water.

## 2-2. Screening of Cu sources

**Table S2.** Screening of Cu sources

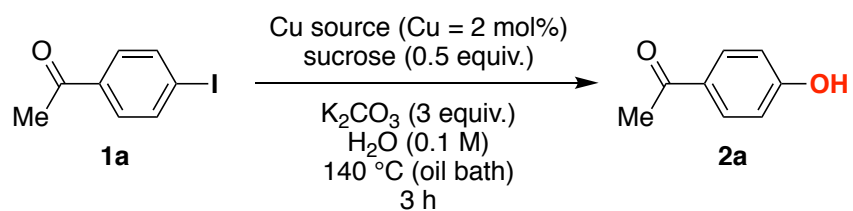

| Entry | Cu source         | Yield (%) <sup>a</sup> |
|-------|-------------------|------------------------|
| 1     | Cu <sub>2</sub> O | quant.                 |
| 2     | CuI               | 98                     |
| 3     | CuBr              | 86                     |
| 4     | CuCl              | 76                     |

<sup>a</sup> NMR yield.

## 2-3. Amount of sucrose

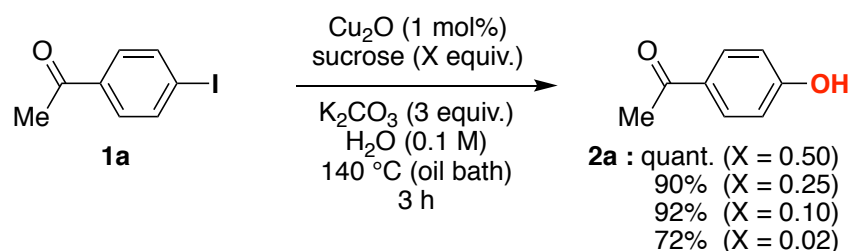

**Scheme S1.** Cu-catalyzed hydroxylation reaction with various amounts of sucrose.

The hydroxylation reaction of **1a** afforded the product **2a** in 92% yield when the amount of sucrose was reduced to 0.1 equivalent. However, the yield was lowered when 0.02 equivalent of sucrose was used. Given the reactivity, in particular with poor solubility of substrates, and low cost of sucrose, we decided to use 0.5 equivalents of sucrose as the standard conditions for the present hydroxylation reaction.

## 2-4. The hydroxylation reaction of aryl bromides

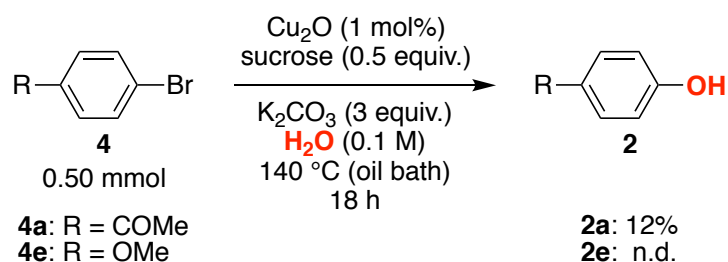

**Scheme S2.** Cu-catalyzed hydroxylation reaction of aryl bromides.

The reactions of aryl bromides did not proceed well, and the starting materials were recovered.

## 2-5. The reaction in the presence of octa-*O*-methylsucrose

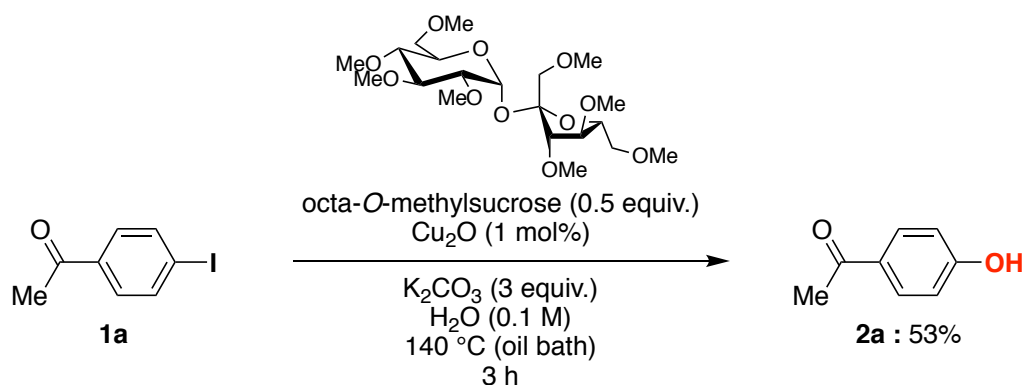

**Scheme S3.** Cu-catalyzed hydroxylation reaction in the presence of octa-*O*-methylsucrose.

Although octa-*O*-methylsucrose enhanced the solubility of the substrate (**Table S1**, Entry 15), the reaction of **1a** in the presence of octa-*O*-methylsucrose afforded **2a** in 53% yield with **1a** remained. This result indicated that alkoxide groups of sucrose are necessary for the high reactivity of catalyst.

## 2-6. The reaction profile

The reaction profile of the hydroxylation reaction of **1a** under the optimized conditions was monitored. The yields of the product and the remained starting material were determined by  $^1\text{H}$  NMR analysis with dimethylsulfone as an internal standard (**Figure S1**).

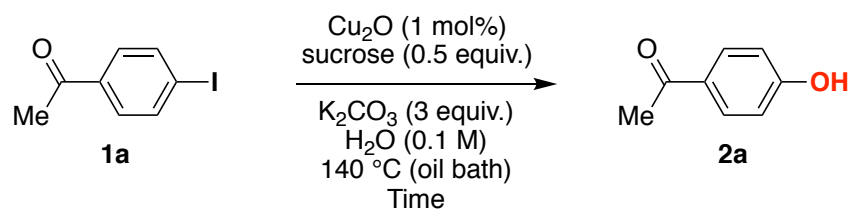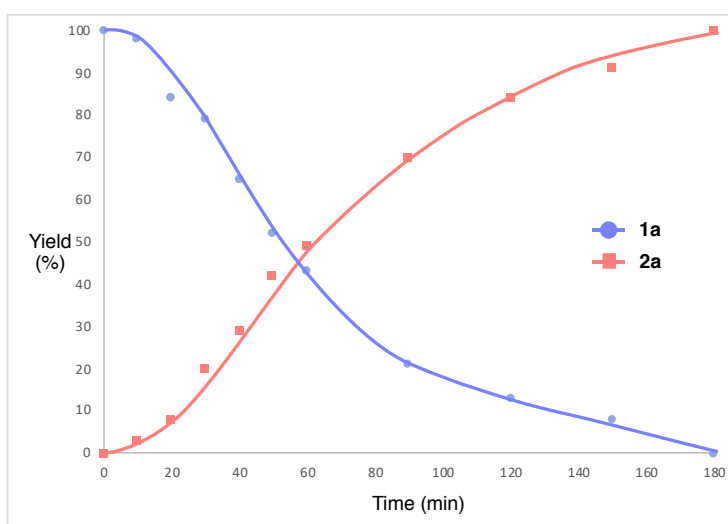

**Figure S1.** The reaction profile of the hydroxylation reaction of **1a** catalyzed by Cu/sucrose system.

### 3. Supplementary results of DFT calculations

#### 3-1. Stability of the Cu-complexes with methylglucoside

Firstly, stable Cu-complexes coordinated by the alkoxide group of methylglucoside and water molecule were searched by GRRM search at a low level of theory (@HF/LanL2DZ). This search was initiated from the structures with the coordination of oxygen atom to the copper center at the 2, 3, 4, and 6-positions of methylglucoside, respectively. Subsequently, the stable structures, which were extracted from 181 conformers obtained by GRRM search, were re-optimized at the M06-2X/SDD&6-311+G\*/SMD(water) //M06-2X/SDD&6-31+G\*/SMD(water) level of theory (**Figure S2**).

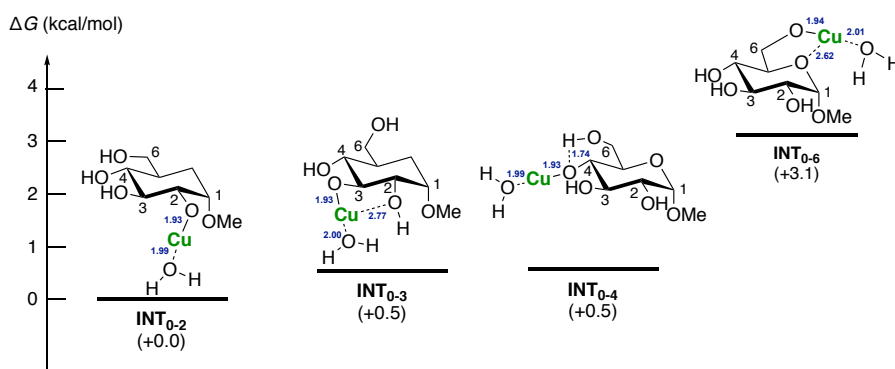

**Figure S2.** Optimized Cu-complexes coordinated by the alkoxide group of methylglucoside and water.

As a result, the 2-position complex **INT<sub>0-2</sub>** is the most stable among them. **INT<sub>0-3</sub>** and **INT<sub>0-4</sub>** are also nearly stable (+0.5 kcal/mol). While **INT<sub>0-6</sub>** is rather unstable (+3.1 kcal/mol) compared with **INT<sub>0-2</sub>**, all of these complexes should exist in an equilibrium in the reaction mixture.

### 3-2. Reaction pathways with the neutral Cu-complex bearing a methylglucoside

To track the reaction pathway of iodobenzene as a model substrate, we set the Cu-complexes bearing iodobenzene and alkoxide group of methylglucoside as the model starting complex based on the previous research.<sup>S2</sup> We compared the stability among those Cu-complexes, which were similarly re-optimized structures after GRRM search. The 2-position complex **INT<sub>1</sub>** is the most stable and the 3-, 4-, and 6-position complexes are less stable (>3 kcal/mol) (**Figure S3**). These values are reflected in the following calculations.

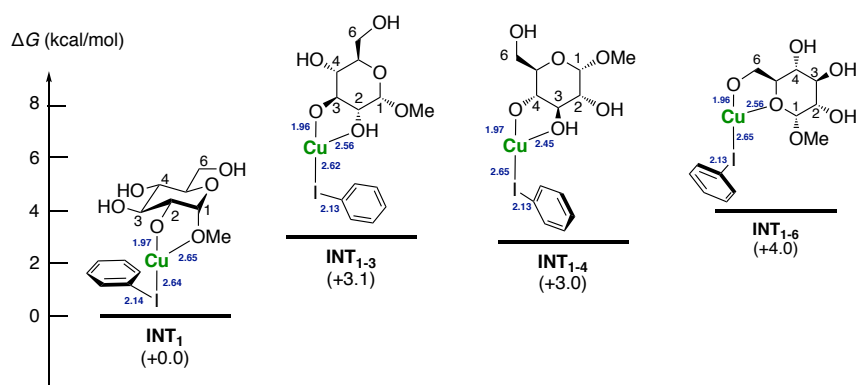

**Figure S3.** Stability of the neutral Cu-complexes bearing methylglucoside and iodobenzene.

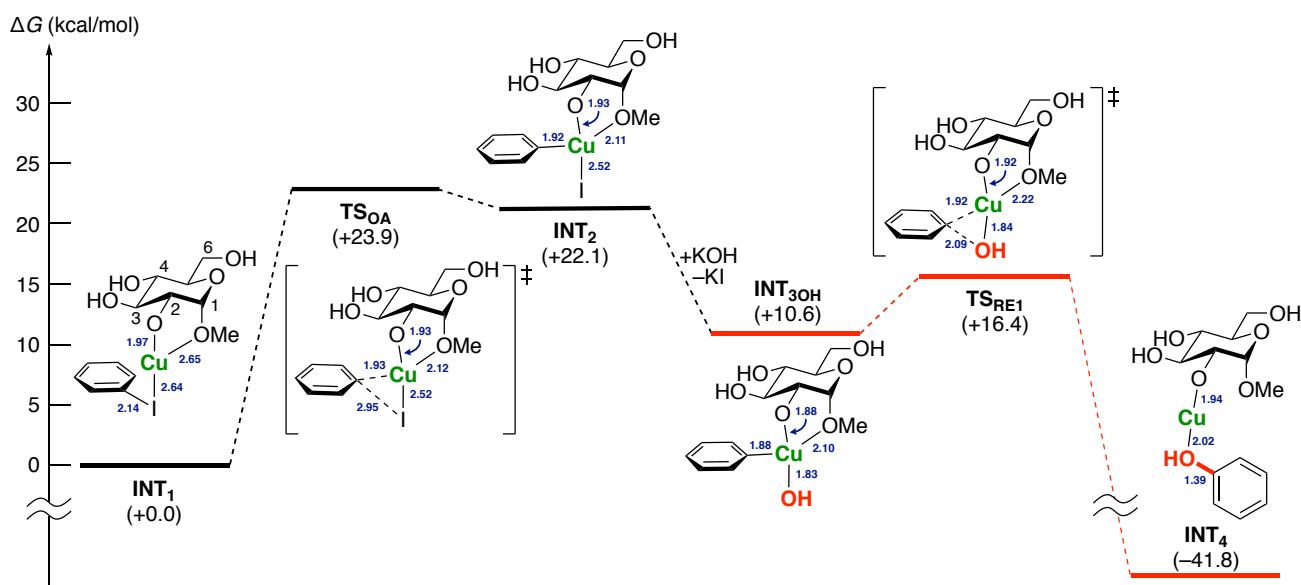

**Figure S4.** Modeled reaction pathway with the neutral 2-position Cu-complex. Energy changes and bond lengths at the M06-2X/SDD and 6-311+G\*/SMD(water)//M06-2X/SDD and 6-31+G\*/SMD (water) level of theory are shown in kcal/mol and Å, respectively.



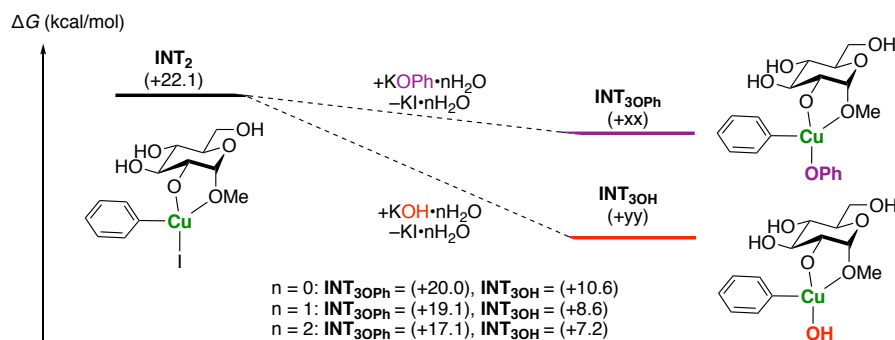

**Figure S5.** Comparison of energy changes in the ligand exchange events between iodide and HO<sup>-</sup>/PhO<sup>-</sup>.

In Figure 1 in the manuscript, we discussed the reaction pathways for the desired hydroxylation as well as the diphenyl ether formation. Before the C–O bond formation to afford phenol (desired) or diphenyl ether (a possible byproduct), the ligand exchange between iodide and HO<sup>-</sup> or PhO<sup>-</sup> should be occurred. This event was modeled as the following isodesmic reactions: LCu(Ph)I + KOH·nH<sub>2</sub>O → LCu(Ph)OH + KI·nH<sub>2</sub>O and LCu(Ph)I + KOPh·nH<sub>2</sub>O → LCu(Ph)OPh + KI·nH<sub>2</sub>O. Irrespective of the number of coordinating water molecules (n = 0–2), the energy changes of these reactions were similar as summarized in **Figure S5**. The discussion on Figure 1 is described with the results of n = 0.

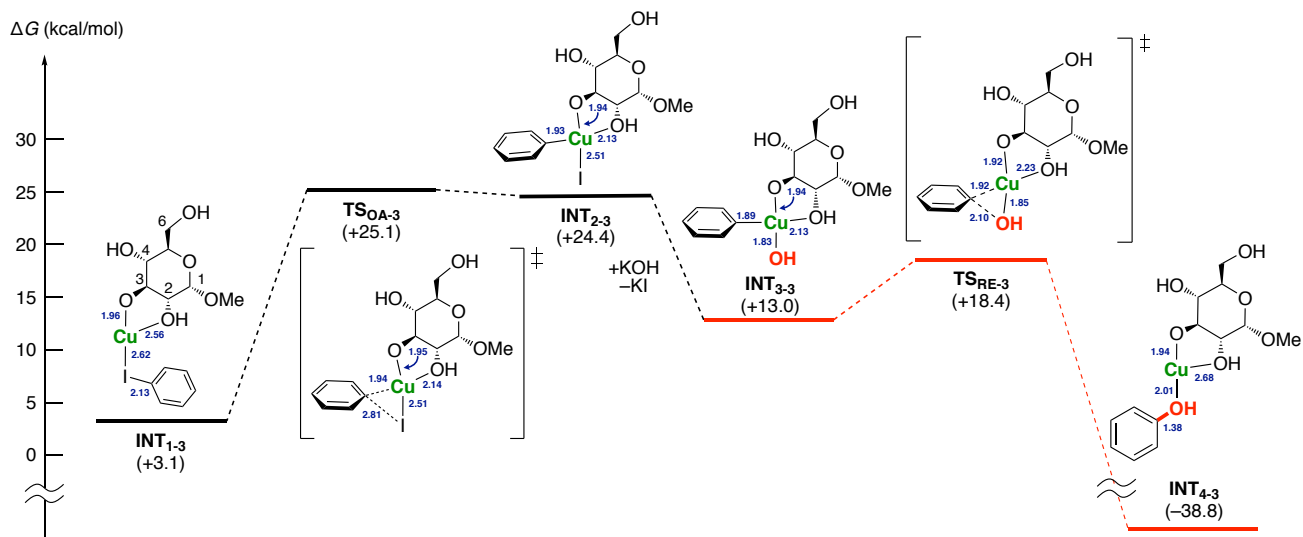

**Figure S6.** Modeled reaction pathway with the neutral 3-position Cu-complex. Energy changes and bond lengths at the M06-2X/SDD and 6-311+G\*/SMD(water)//M06-2X/SDD and 6-31+G\*/SMD (water) level of theory are shown in kcal/mol and Å, respectively.

In the reaction pathway with the 3-position complex, a higher activation barrier is observed for the oxidative addition via  $\text{TS}_{\text{OA-3}}$  ( $\Delta G^\ddagger +25.1$  kcal/mol) than that of the 2-position complex ( $\Delta G^\ddagger +23.9$  kcal/mol). Since the energy changes including the following reductive elimination are similar and not very high, the possibility of the reaction with the 3-position complex is not excluded at this time.

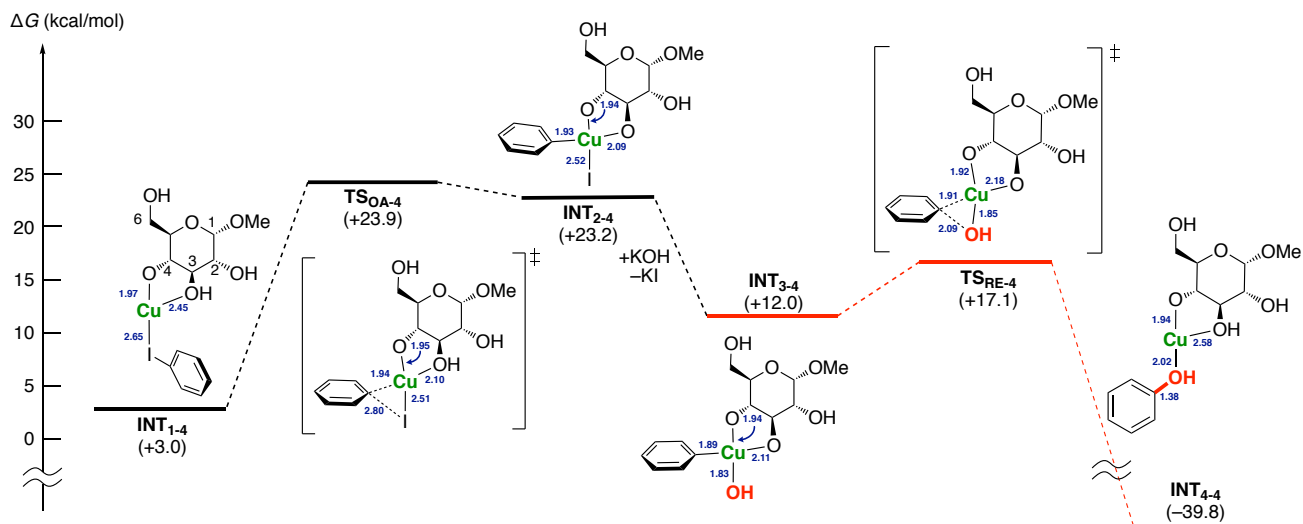

**Figure S7.** Modeled reaction pathway with the neutral 4-position Cu-complex. Energy changes and bond lengths at the M06-2X/SDD and 6-311+G\*/SMD(water)//M06-2X/SDD and 6-31+G\*/SMD (water) level of theory are shown in kcal/mol and Å, respectively.

In the reaction pathway with the 4-position complex, similar activation barriers as the case of the 2-position complex were observed, and this is also a feasible pathway.

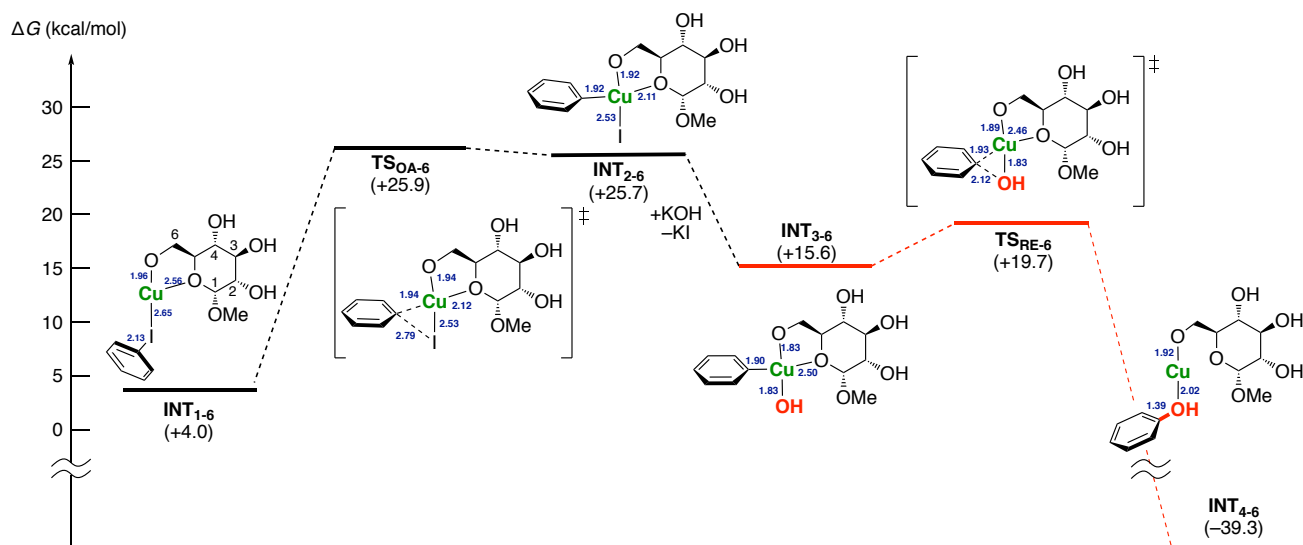

**Figure S8.** Modeled reaction pathway with the neutral 6-position Cu-complex. Energy changes and bond lengths at the M06-2X/SDD and 6-311+G\*/SMD(water)//M06-2X/SDD and 6-31+G\*/SMD (water) level of theory are shown in kcal/mol and Å, respectively.

In the reaction pathway with the 6-position complex, a higher activation barrier is observed for the oxidative addition via **TS<sub>OA-6</sub>** ( $\Delta G^\ddagger$  +25.9 kcal/mol) than that of the 2-position complex ( $\Delta G^\ddagger$  +23.9 kcal/mol). In addition, the 6-position complex **INT<sub>1-6</sub>** is unstable compared with the 2-position complex **INT<sub>1-2</sub>** (4.0 kcal/mol) and should not exist as in a substantial amount as described in **Figure S2**. Therefore, the pathway with the 6-position complex should be unlikely as the major pathway.

### 3-3. Reaction pathways with the anionic Cu-complex bearing a methylglucoside

The pathway with the anionic Cu-complexes generated from Cu(I) with the bidentate anionic ligand, namely an “anionic pathway,” was proposed in the Ullmann-type coupling reaction of aryl halides with phenols.<sup>S2g</sup> To check the possibility of the anionic pathway, we set the Cu-complexes coordinated by iodobenzene, hydroxide, and the alkoxide group of methylglucoside as the model starting complex. We compared the stability among those Cu-complexes, which were similarly re-optimized structures after GRRM search. As a result, 2- and 4-position complexes **INT**<sub>1-2\_anion</sub> and **INT**<sub>1-4\_anion</sub> are stable while **INT**<sub>1-3\_anion</sub> and **INT**<sub>1-6\_anion</sub> are less stable (**Figure S9**). These values are reflected in the following calculations.

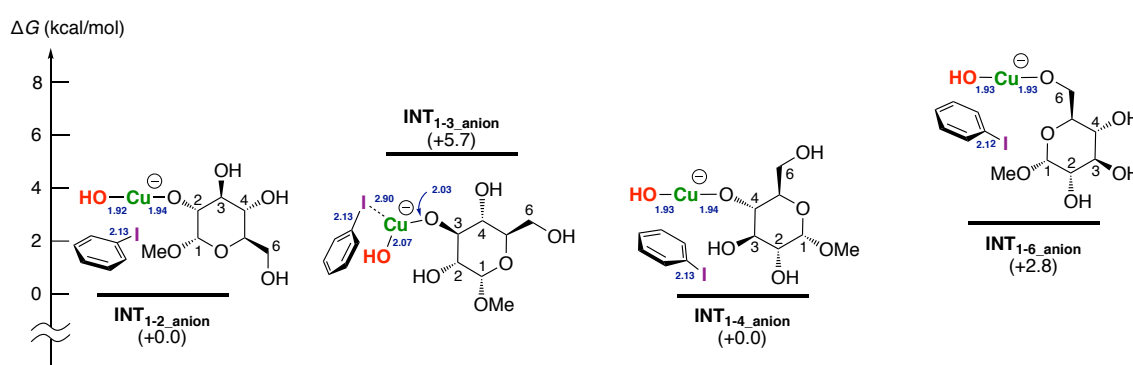

**Figure S9.** Stability of the anionic Cu-complexes bearing iodobenzene, hydroxide, and methylglucoside

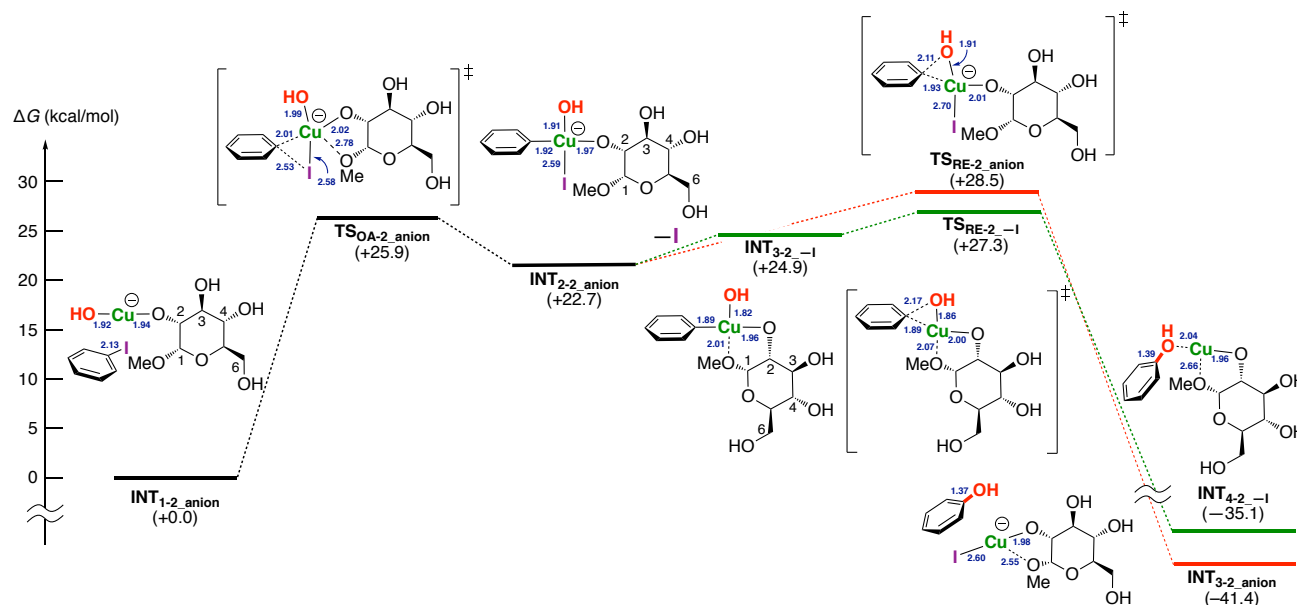

**Figure S10.** Modeled reaction pathways with the anionic 2-position Cu-complex. Energy changes and bond lengths at the M06-2X/SDD and 6-311+G\*/SMD(water)//M06-2X/SDD and 6-31+G\*/SMD (water) level of theory are shown in kcal/mol and Å, respectively.

In the case of the pathway with the anionic 2-position Cu-complex, the higher energy barrier for the oxidative addition via  $\text{TS}_{\text{OA-2\_anion}}$  than the neutral pathway ( $\Delta G^\ddagger +23.9$  kcal/mol in **Figure S4**) is observed. Transition state  $\text{TS}_{\text{RE-2\_anion}}$  for the direct reductive elimination from anionic pentacoordinate species  $\text{INT}_{2-2\_anion}$  lies 2.6 kcal/mol above the  $\text{TS}_{\text{OA-2\_anion}}$ . Moreover, transition state  $\text{TS}_{\text{RE-2\_I}}$  for the reductive elimination via the dissociation of iodide anion also lies 1.6 kcal/mol above  $\text{TS}_{\text{OA-2\_anion}}$ . These results indicate the anionic pathway with the 2-position complex is less likely compared with the corresponding neutral pathway.

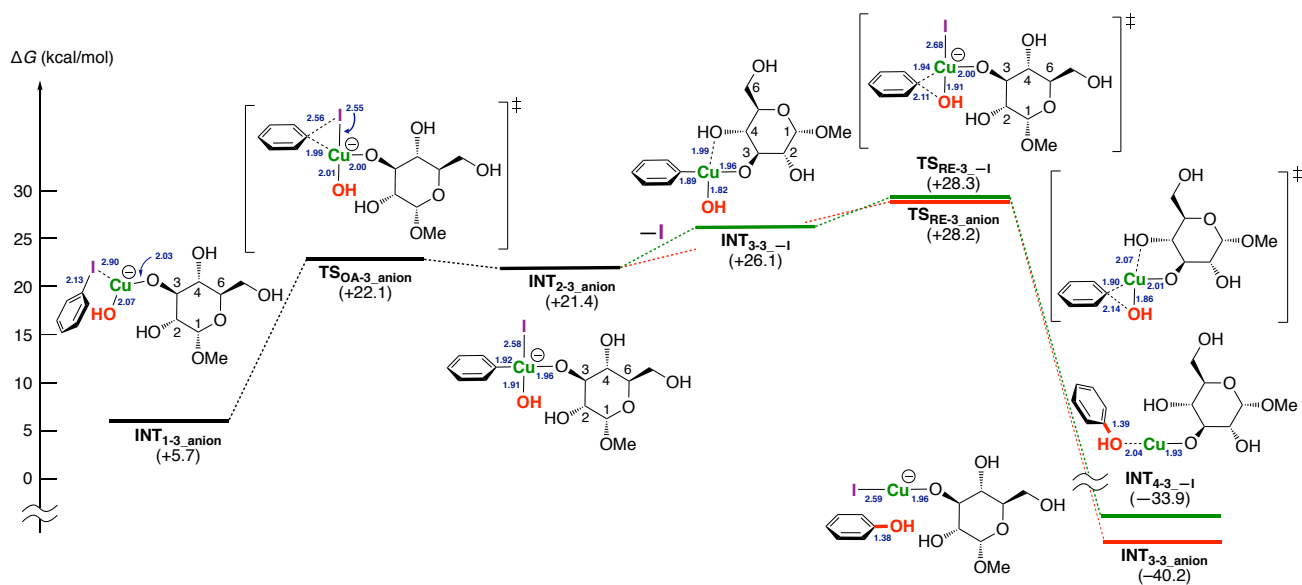

**Figure S11.** Modeled reaction pathways with the anionic 3-position Cu-complex. Energy changes and bond lengths at the M06-2X/SDD and 6-311+G\*/SMD(water)//M06-2X/SDD and 6-31+G\*/SMD (water) level of theory are shown in kcal/mol and Å, respectively.

In the pathway with the anionic 3-position Cu-complex, the low barrier ( $\Delta G^\ddagger +22.1$  kcal/mol) for the oxidative addition  $\text{TS}_{\text{OA-3\_anion}}$  is observed. However, the following reductive elimination events with or without the dissociation of iodide anion lies at +28.2 and +28.3 kcal/mol, respectively. Moreover,  $\text{INT}_{1-3\_anion}$  is unstable compared with  $\text{INT}_{1-2\_anion}$  (+5.7 kcal/mol) and unlikely to participate in this catalytic cycle.

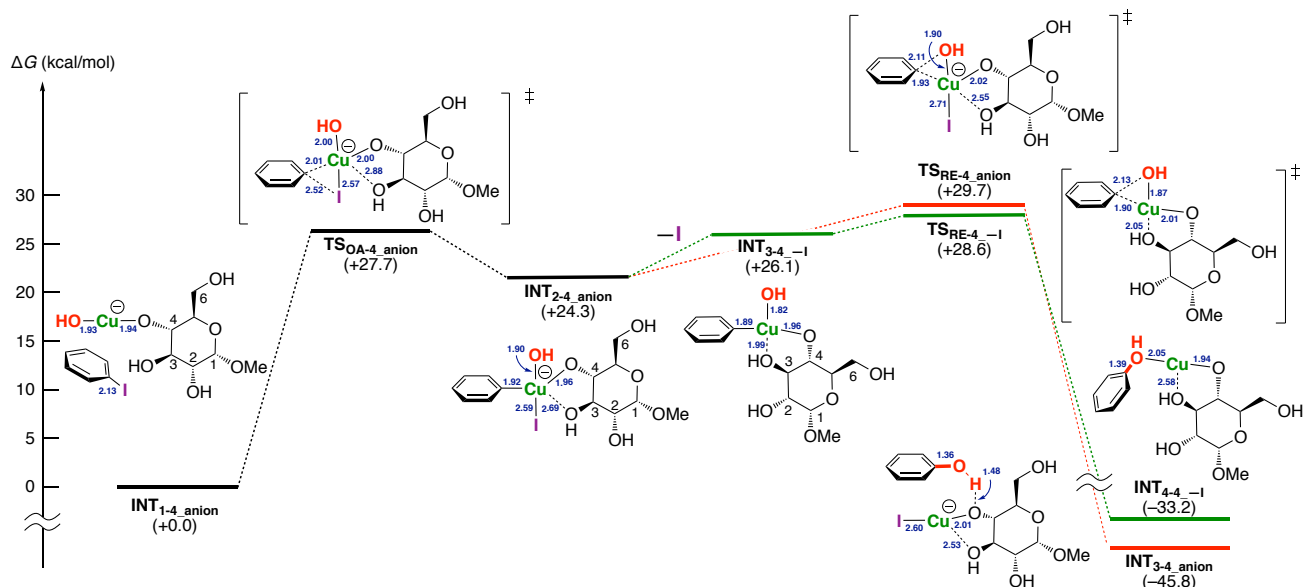

**Figure S12.** Modeled reaction pathways with the anionic 4-position Cu-complex. Energy changes and bond lengths at the M06-2X/SDD and 6-311+G\*/SMD(water)//M06-2X/SDD and 6-31+G\*/SMD (water) level of theory are shown in kcal/mol and Å, respectively.

The pathway with the anionic 4-position complex should be unlikely, due to the high energy barriers for the oxidative addition  $\text{TS}_{\text{OA-4\_anion}}$  ( $\Delta G^\ddagger +27.7$  kcal/mol), reductive eliminations  $\text{TS}_{\text{RE-4\_anion}}$  and  $\text{TS}_{\text{RE-4\_1}}$  ( $\Delta G^\ddagger +29.7$  and  $+28.6$  kcal/mol, respectively).

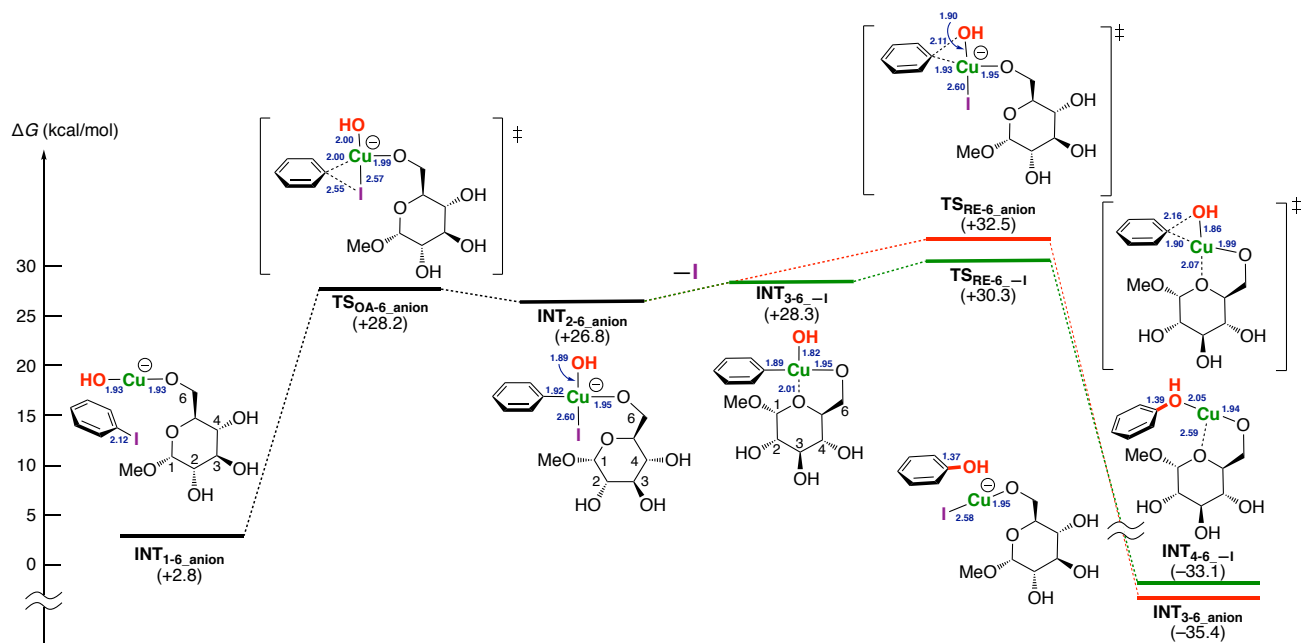

**Figure S13.** Modeled reaction pathways with the anionic 6-position Cu-complex. Energy changes and bond lengths at the M06-2X/SDD and 6-311+G\*/SMD(water)//M06-2X/SDD and 6-31+G\*/SMD (water) level of theory are shown in kcal/mol and Å, respectively.

In the pathways with the anionic 6-position complex, transition states for both reductive elimination events with and without the dissociation of iodide anion lie above +30 kcal/mol. Therefore, these pathways are also unlikely.

Given the comparison of overall free energy barriers among the neutral and anionic pathways, the neutral pathway is likely to be favorable in this Cu-catalyzed hydroxylation reaction although the anionic pathways, especially with the anionic 2-position complex, are not be completely excluded at this time.

### 3-4. $\sigma$ -Bond metathesis pathway

We examined the possibility of the pathway via  $\sigma$ -bond metathesis mechanism by DFT calculation with the 2-position Cu-complex (**Figure S14**). The activation barrier for  $\sigma$ -bond metathesis is +32.1 kcal/mol. Therefore, this pathway is excluded as the feasible pathway to produce phenol product.

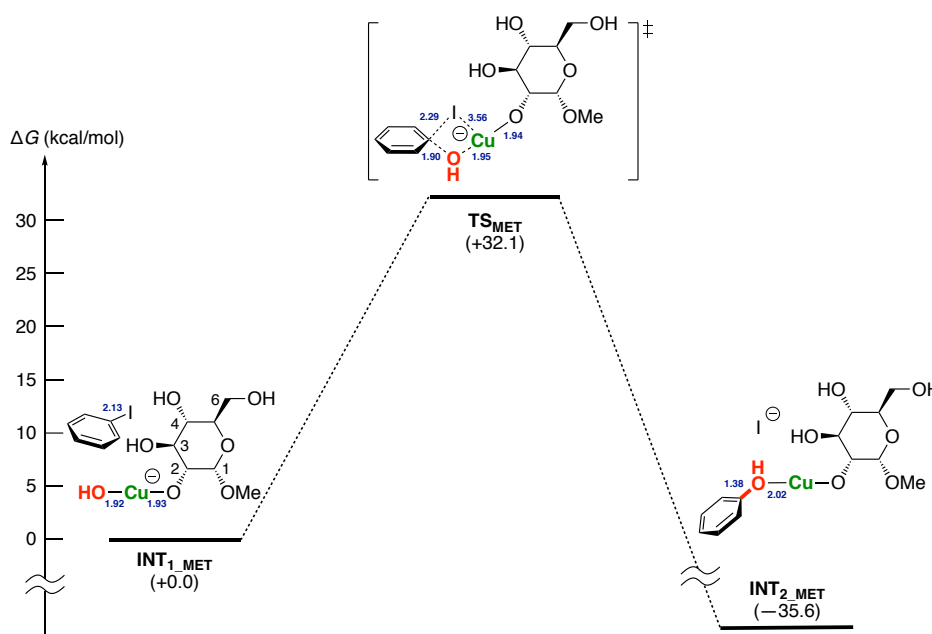

**Figure S14.** Modeled reaction pathway via  $\sigma$ -Bond metathesis mechanism. Energy changes and bond lengths at the M06-2X/SDD and 6-311+G\*/SMD(water)//M06-2X/SDD and 6-31+G\*/SMD(water) level of theory are shown in kcal/mol and Å, respectively.

### 3-5. Other ligands: Cu-TMEDA and Cu-DME complexes

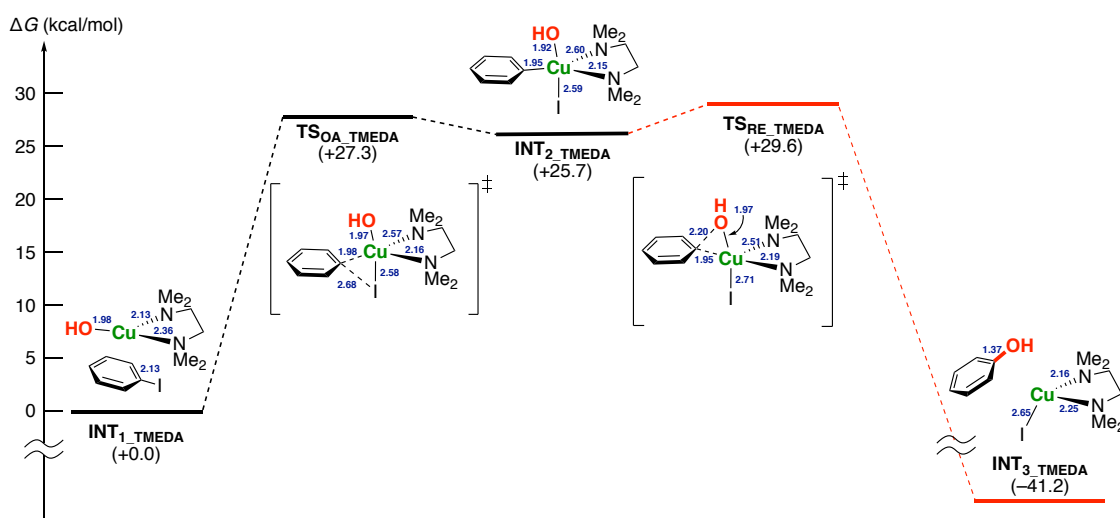

**Figure S15.** Modeled reaction pathway of the Cu-TMEDA -complex. Energy changes and bond lengths at the M06-2X/SDD and 6-311+G\*/SMD(water)//M06-2X/SDD and 6-31+G\*/SMD(water) level of theory are shown in kcal/mol and Å, respectively.

In the case of Cu-TMEDA-complex, the activation barrier was higher than that observed with Cu-complex bearing a methylglucoside and the barrier for the reductive elimination is also high (**Figure 15**).

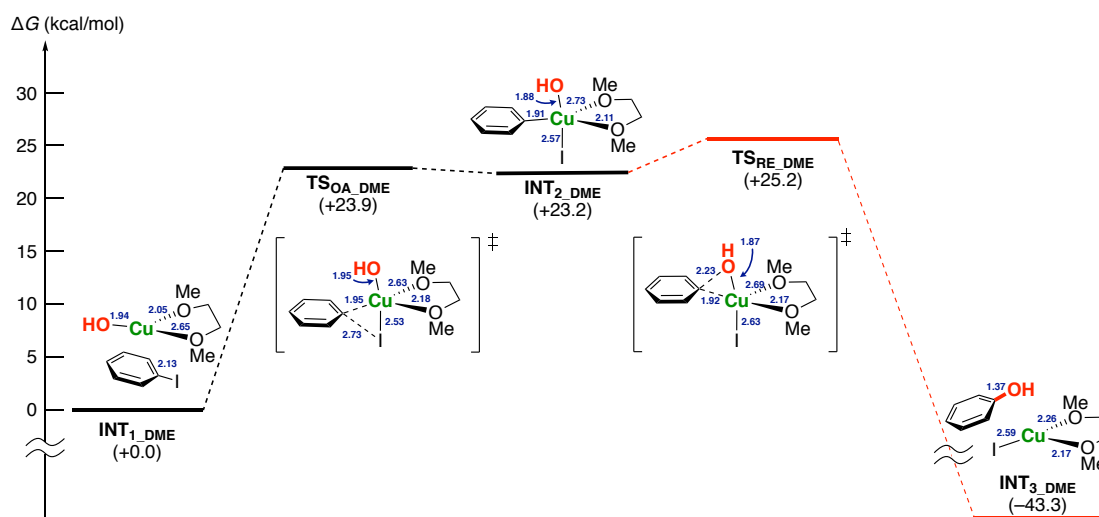

**Figure S16.** Modeled reaction pathway of the Cu-DME-complex. Energy changes and bond lengths at the M06-2X/SDD and 6-311+G\*/SMD(water)//M06-2X/SDD and 6-31+G\*/SMD (water) level of theory are shown in kcal/mol and Å, respectively.



Given that the transition states for the oxidative addition and reductive elimination are located at +23.9 kcal/mol and +25.2 kcal/mol, the reaction with the Cu-DME-complex should proceed rather smoothly (**Figure S16**). So, intrinsically, the coordination of DME would improve the catalytic activity. But, as discussed in Table 1 in the manuscript, the solubility of substrate is poor in the presence of 0.5 equivalents of DME. In total, the moderate yield was observed in the presence of DME in Table 2.

## 4. Experimental section

### 4-1. General procedure for Cu-catalyzed hydroxylation in water

Copper(I) oxide (0.7 mg, 0.005 mmol),  $K_2CO_3$  (207 mg, 1.5 mmol), and iodo(hetero)arene **1** (0.50 mmol) were charged in a 10 mL screw cap tube under air, and 5.0 mL of distilled water was added via a syringe. The tube was closed after roughly purged with  $N_2$  gas flow or without purging. The reaction mixture was heated (oil bath temp: 140 °C) and stirred. After stirring, the tube was cooled in an ice bath before the screw cap was opened. (otherwise, the mixture may spout out under high pressure.) The reaction mixture was diluted with AcOEt (*ca.* 30 mL, generally TLC check at this stage) and transferred to a separation funnel. The solution was washed with saturated ammonium chloride aqueous solution (20 mL), and then, the aqueous layer was re-extracted with AcOEt (20 mL  $\times$  2). The combined organic layer was dried over  $Na_2SO_4$ , and evaporated in vacuo. The chemical yield was determined by  $^1H$  NMR analysis using dimethylsulfone as an internal standard. The obtained material was purified by silica gel flash column chromatography (eluent: AcOEt/n-hexane) to give the corresponding phenol products **2**.

### 4-2. Characterization of the products

#### 4-Acetylphenol (**2a**): CAS# 99-93-4<sup>S3</sup>

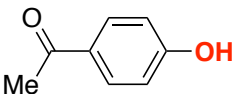 **2a** was obtained as a cream solid in 94% yield (64.2 mg, 0.472 mmol).  $^1H$  NMR (400 MHz,  $CDCl_3$ )  $\delta$  7.92 (d,  $J$  = 8.8 Hz, 2H), 7.51 (br-s, 1H), 6.95 (d,  $J$  = 8.8 Hz, 2H), 2.59 (s, 3H);  $^{13}C$  NMR (100 MHz,  $CDCl_3$ )  $\delta$  198.4, 161.2, 131.2, 129.7, 115.5, 26.3; EI-MS  $m/z$  (rel intensity) 136 ( $M^+$ , 36); mp 106-108 °C.

#### 3-Acetylphenol (**2b**): CAS# 121-71-1<sup>S4</sup>

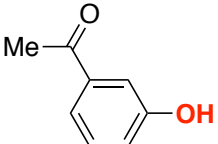 **2b** was obtained as a cream solid in 90% yield (61.4 mg, 0.451 mmol).  $^1H$  NMR (400 MHz,  $CDCl_3$ )  $\delta$  7.55 (dd,  $J$  = 2.3, 1.6 Hz, 1H), 7.52 (ddd,  $J$  = 7.9, 1.6, 0.8 Hz, 1H), 7.34 (dd,  $J$  = 7.9, 7.9 Hz, 1H), 7.12 (ddd,  $J$  = 7.9, 2.3, 0.8 Hz, 1H), 6.60 (br-s, 1H), 2.61 (s, 3H);  $^{13}C$  NMR (100 MHz,  $CDCl_3$ )  $\delta$  199.2, 156.3, 138.3, 129.9, 121.1, 120.8, 114.7, 26.8; EI-MS  $m/z$  (rel intensity) 136 ( $M^+$ , 61); mp 93-94 °C.

#### 2-Acetylphenol (**2c**): CAS# 118-93-4<sup>S5</sup>

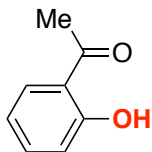 **2c** was obtained as a brown oil in 91% yield (61.8 mg, 0.454 mmol).  $^1H$  NMR (400 MHz,  $CDCl_3$ )  $\delta$  12.27 (s, 1H), 7.74 (dd,  $J$  = 7.8, 1.6 Hz, 1H), 7.48 (ddd,  $J$  = 7.8, 7.8, 1.6 Hz, 1H), 6.98 (dd,  $J$  = 7.8, 1.1 Hz, 1H), 6.91 (ddd,  $J$  = 7.8, 7.8, 1.1 Hz, 1H), 2.64 (s, 3H);  $^{13}C$  NMR (100 MHz,  $CDCl_3$ )  $\delta$  204.5, 162.4, 136.5, 130.7, 119.7, 118.9, 118.4, 26.6; EI-MS  $m/z$  (rel intensity) 136 ( $M^+$ , 55).

**Phenol (2d): CAS# 108-95-2<sup>S6</sup>**

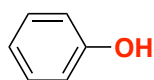

**2d** was obtained as a white solid in 63% yield (29.6 mg, 0.315 mmol)

**<sup>1</sup>H NMR (400 MHz, CDCl<sub>3</sub>)** δ 7.25 (dd, *J* = 8.6, 7.5 Hz, 2H), 6.93 (tt, *J* = 7.5, 0.8 Hz, 1H), 6.83 (dd, *J* = 8.6, 0.8 Hz, 2H), 4.89 (br-s, 1H); **<sup>13</sup>C NMR (100 MHz, CDCl<sub>3</sub>)** δ 155.4, 129.7, 120.9, 115.3; **EI-MS *m/z*** (rel intensity) 94 (M<sup>+</sup>, 100); mp 38-40 °C.

**4-Methoxyphenol (2e): CAS# 150-76-5<sup>S4</sup>**

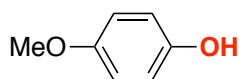

**2e** was obtained as a white solid in 90% yield (55.9 mg, 0.450 mmol).

**<sup>1</sup>H NMR (400 MHz, CDCl<sub>3</sub>)** δ 6.81-6.75 (m, 4H), 4.66 (br-s, 1H), 3.76 (s, 3H); **<sup>13</sup>C NMR (100 MHz, CDCl<sub>3</sub>)** δ 153.7, 149.4, 116.0, 114.8, 55.8; **EI-MS *m/z*** (rel intensity) 124 (M<sup>+</sup>, 94); mp 53-55 °C.

**3-Methoxyphenol (2f): CAS# 150-19-6<sup>S4</sup>**

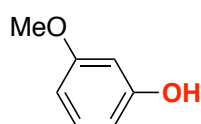

**2f** was obtained as a brown oil in 92% yield (57.1 mg, 0.418 mmol).

**<sup>1</sup>H NMR (400 MHz, CDCl<sub>3</sub>)** δ 7.13 (dd, *J* = 8.3, 8.3 Hz, 1H), 6.50 (dd, *J* = 8.3, 1.3 Hz, 1H), 6.44-6.42 (m, 1H), 6.42 (d, *J* = 1.3 Hz, 1H), 5.08 (br-s, 1H), 3.78 (s, 3H). **<sup>13</sup>C NMR (100 MHz, CDCl<sub>3</sub>)** δ 160.9, 156.7, 130.1, 107.8, 106.4, 101.5, 55.3; **EI-MS *m/z*** (rel intensity) 124 (M<sup>+</sup>, 100).

**2-Methoxyphenol (2g): CAS# 90-05-1<sup>S5</sup>**

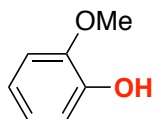

**2g** was obtained as a yellow oil in 83% yield (51.5 mg, 0.415 mmol)

**<sup>1</sup>H NMR (400 MHz, CDCl<sub>3</sub>)** δ 6.92-6.94 (m, 1H), 6.85-6.90 (m, 3H), 5.61 (s, 1H), 3.89 (s, 3H); **<sup>13</sup>C NMR (100 MHz, CDCl<sub>3</sub>)** δ 146.5, 145.6, 121.4, 120.1, 114.5, 110.7, 55.8; **EI-MS *m/z*** (rel intensity) 124 (M<sup>+</sup>, 88).

**4-Aminophenol (2h): CAS# 371-41-5<sup>S7</sup>**

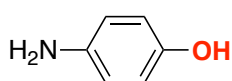

**2h** was obtained as a dark brown solid in 58% yield (31.4 mg, 0.288 mmol).

Unsubstituted aniline (dehalogenation, 14% NMR yield), a trace amount of 4,4'-oxydianiline (detected on GC-MS analysis), and an insoluble purple material (probably due to the oxidation of **2h**) were also formed.

**<sup>1</sup>H NMR (400 MHz, CD<sub>3</sub>OD)** δ 6.65-6.58 (m, 4H), OH peak of phenol and NH<sub>2</sub> peak of aniline were diminished by CD<sub>3</sub>OD; **<sup>13</sup>C NMR (100 MHz, CD<sub>3</sub>OD)** δ 152.2, 141.1, 119.4, 117.6; **EI-MS *m/z*** (rel intensity) 109 (M<sup>+</sup>, 100); mp 183-185 °C.

**4-Methylphenol (2i): CAS# 106-44-5<sup>S8</sup>**

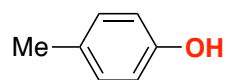

**2i** was obtained as a brown oil in 58% yield (31.7 mg, 0.293 mmol).

**<sup>1</sup>H NMR (400 MHz, CDCl<sub>3</sub>)** δ 7.03 (d, *J* = 8.2 Hz, 2H), 6.73 (d, *J* = 8.2 Hz, 2H), 4.67 (s, 1H), 2.27 (s, 3H); **<sup>13</sup>C NMR (100 MHz, CDCl<sub>3</sub>)** δ 153.2, 130.1, 130.0, 115.0, 20.4; **EI-MS** *m/z* (rel intensity) 108 (M<sup>+</sup>, 55).

**4-Fluorophenol (2j): CAS# 371-41-5<sup>S6</sup>**

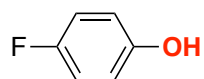

**2j** was obtained as a brown oil in 79% yield (44.3 mg, 0.395 mmol)

**<sup>1</sup>H NMR (400 MHz, CDCl<sub>3</sub>)** δ 6.92 (dd, *J* = 8.9, 8.8 Hz, 2H), 6.77 (dd, *J* = 8.8, 4.3 Hz, 2H), 4.65 (s, 1H); **<sup>13</sup>C NMR (100 MHz, CDCl<sub>3</sub>)** δ 157.3 (d, *J* = 236.0 Hz), 151.4 (d, *J* = 2.1 Hz), 116.2 (d, *J* = 8.0 Hz), 116.0 (d, *J* = 23.2 Hz); **EI-MS** *m/z* (rel intensity) 112 (M<sup>+</sup>, 100).

**4-Chlorophenol (2k): CAS# 106-48-9<sup>S6</sup>**

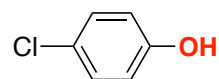

**2k** was obtained as a colorless oil in 59% yield (38.1 mg, 0.296 mmol).

**<sup>1</sup>H NMR (400 MHz, CDCl<sub>3</sub>)** δ 7.19 (d, *J* = 8.8 Hz, 2H), 6.76 (d, *J* = 8.8 Hz, 2H), 5.12 (s, 1H); **<sup>13</sup>C NMR (100 MHz, CDCl<sub>3</sub>)** δ 154.0, 129.5, 125.7, 116.6; **EI-MS** *m/z* (rel intensity) 128 (M<sup>+</sup>, 100).

**3-Chlorophenol (2l): CAS# 108-43-0<sup>S4</sup>**

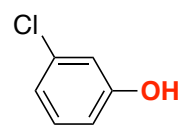

**2l** was obtained as a colorless oil in 52% yield (33.1 mg, 0.259 mmol).

**<sup>1</sup>H NMR (400 MHz, CDCl<sub>3</sub>)** δ 7.15 (dd, *J* = 8.1, 8.1 Hz, 1H), 6.91 (d, *J* = 8.1 Hz, 1H), 6.86 (s, 1H), 6.71 (dd, *J* = 8.1, 1.8 Hz, 1H) 5.16 (br-s, 1H); **<sup>13</sup>C NMR (100 MHz, CDCl<sub>3</sub>)** δ 156.2, 134.9, 130.5, 121.1, 115.9, 113.7; **EI-MS** *m/z* (rel intensity) 128 (M<sup>+</sup>, 100).

**3-Hydroxypyridine (2m): CAS# 109-00-2<sup>S4</sup>**

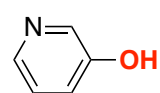

**2m** was obtained as a cream solid in 93% yield (44.1 mg, 0.464 mmol)

**<sup>1</sup>H NMR (400 MHz, DMSO-*d*<sub>6</sub>)** δ 9.88 (s, 1H), 8.15 (br-s, 1H), 8.04 (br-s, 1H), 7.21-7.14 (m, 2H); **<sup>13</sup>C NMR (100 MHz, DMSO-*d*<sub>6</sub>)** δ 153.7, 140.3, 138.0, 124.2, 122.0; **EI-MS** *m/z* (rel intensity) 95 (M<sup>+</sup>, 100); **mp** 122-123 °C.

**5-Hydroxy-2-methoxypyridine (2n): CAS# 51834-97-0<sup>S9</sup>**

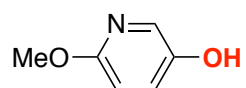

**2n** was obtained as a brown solid in 73% yield (45.7 mg, 0.365 mmol)

**<sup>1</sup>H NMR (400 MHz, DMSO-*d*<sub>6</sub>)** δ 9.28 (s, 1H), 7.68 (d, *J* = 3.0 Hz, 1H), 7.17 (dd, *J* = 8.8, 3.0 Hz, 1H), 6.66 (d, *J* = 8.8 Hz, 1H), 3.75 (s, 3H); **<sup>13</sup>C NMR (100 MHz, DMSO-*d*<sub>6</sub>)** δ 156.9, 148.6, 132.3, 127.3, 110.5, 52.9; **EI-MS** *m/z* (rel intensity) 125 (M<sup>+</sup>, 85); **mp** 72-74 °C.

**3-Hydroxy-2-methoxypyridine (2o): CAS# 13472-83-8** (No data for the title compound is available)

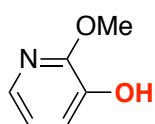

**2o** was obtained as a brown solid in 64% yield (40.0 mg, 0.320 mmol)

**<sup>1</sup>H NMR (400 MHz, DMSO-*d*<sub>6</sub>)** δ. 9.45 (s, 1H), 7.58 (dd, *J* = 5.0, 1.6 Hz, 1H), 7.06 (dd, *J* = 7.6, 1.6 Hz, 1H), 6.80 (dd, *J* = 7.6, 5.0 Hz, 1H), 3.85 (s, 3H); **<sup>13</sup>C NMR (100 MHz, DMSO-*d*<sub>6</sub>)** δ. 153.5, 141.4, 135.6, 121.6, 117.3, 52.8; **HRMS (ESI (+))** *m/z* calcd for C<sub>6</sub>H<sub>8</sub>NO<sub>2</sub><sup>+</sup> [M+H]<sup>+</sup> 126.0550, found 126.0556; **EI-MS** *m/z* (rel intensity) 125 (M<sup>+</sup>, 100); **mp** 63-64 °C.

**2-Fluoro-5-hydroxypyridine (2p): CAS# 55758-32-2** (No data for the title compound is available)

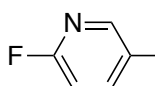

**2p** was obtained as a yellow solid in 71% yield (40.3 mg, 0.356 mmol)

**<sup>1</sup>H NMR (400 MHz, DMSO-*d*<sub>6</sub>)** δ 9.93 (s, 1H), 7.69 (dd, *J* = 3.1, 2.2 Hz, 1H), 7.35 (ddd, *J* = 8.8, 6.8, 3.1 Hz, 1H), 6.99 (dd, *J* = 8.8, 3.4 Hz, 1H); **<sup>13</sup>C NMR (100 MHz, DMSO-*d*<sub>6</sub>)** δ 156.2 (d, *J* = 225.3 Hz), 152.0 (d, *J* = 3.8 Hz), 133.1 (d, *J* = 15.3 Hz), 128.4 (d, *J* = 7.7 Hz), 109.6 (d, *J* = 40.4 Hz); **HRMS (ESI (-))** *m/z* calcd for C<sub>5</sub>H<sub>3</sub>FNO<sup>-</sup> [M-H]<sup>-</sup> 112.0194, found 122.0193; **EI-MS** *m/z* (rel intensity) 113 (M<sup>+</sup>, 100); **mp** 147-149 °C.

**2-Fluoro-3-hydroxypyridine (2q): CAS# 174669-74-0**<sup>S10</sup>

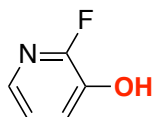

**2q** was obtained as a cream solid in 62% yield (35.1 mg, 0.310 mmol)

**<sup>1</sup>H NMR (400 MHz, DMSO-*d*<sub>6</sub>)** δ 10.40 (s, 1H), 7.61 (ddd, *J* = 4.8, 1.8, 1.7 Hz, 1H), 7.38 (ddd, *J* = 10.8, 7.8, 1.7 Hz, 1H), 7.16 (ddd, *J* = 7.8, 4.8, 1.2 Hz, 1H); **<sup>13</sup>C NMR (100 MHz, DMSO-*d*<sub>6</sub>)** δ 152.4 (d, *J* = 231.8 Hz), 140.2 (d, *J* = 27.2 Hz), 135.6 (d, *J* = 13.1 Hz), 126.2 (d, *J* = 5.6 Hz), 122.6 (d, *J* = 3.9 Hz); **EI-MS** *m/z* (rel intensity) 113 (M<sup>+</sup>, 100); **mp** 124-126 °C.

**6-Hydroxyquinoline (2r): CAS# 580-16-5**<sup>S4</sup>

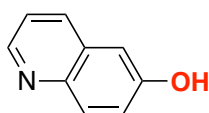

**2r** was obtained as a white solid in 82% yield (59.5 mg, 0.410 mmol)

**<sup>1</sup>H NMR (400 MHz, DMSO-*d*<sub>6</sub>)** δ 10.02 (br-s, 1H), 8.66 (dd, *J* = 4.1, 1.0 Hz, 1H), 8.14 (d, *J* = 8.3 Hz, 1H), 7.86 (d, *J* = 9.0 Hz, 1H), 7.39 (dd, *J* = 8.3, 4.1 Hz, 1H), 7.31 (dd, *J* = 9.0, 2.6 Hz, 1H), 7.14 (d, *J* = 2.6 Hz, 1H); **<sup>13</sup>C NMR (100 MHz, DMSO-*d*<sub>6</sub>)** δ 155.5, 147.1, 143.1, 134.1, 130.4, 129.3, 122.0, 121.4, 108.3; **EI-MS** *m/z* (rel intensity) 145 (M<sup>+</sup>, 100); **mp** 188-190 °C.

**1(2H)-Isoquinolinone (2s): CAS# 491-30-5**<sup>S11</sup>

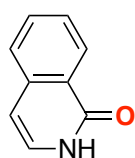

**2s** was obtained as a cream solid in 72% yield (51.9 mg, 0.358 mmol)

**<sup>1</sup>H NMR (400 MHz, DMSO-*d*<sub>6</sub>)** δ 11.25 (br-s, 1H), 8.19 (d, *J* = 7.1 Hz, 1H), 7.70 (ddd, *J* = 6.9, 6.8, 1.3 Hz, 1H), 7.65 (dd, *J* = 6.9, 1.3 Hz, 1H), 7.48 (ddd, *J* = 6.8, 6.7, 1.5 Hz, 1H), 7.18 (dd, *J* = 6.7, 1.5 Hz, 1H), 6.55 (d, *J* = 7.1 Hz, 1H); **<sup>13</sup>C NMR (100 MHz, DMSO-*d*<sub>6</sub>)** δ 161.8, 137.9, 132.3, 129.0, 126.6, 126.3, 126.2, 126.1, 104.6; **EI-MS** *m/z* (rel intensity) 145 (M<sup>+</sup>, 100); **mp** 203-204 °C.

**1-Methyl-1H-pyrazol-4-ol (2t): CAS# 491-30-5<sup>S12</sup>**

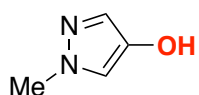

**2t** was obtained as a yellow oil in 31% yield (15.2 mg, 0.155 mmol)

**<sup>1</sup>H NMR (400 MHz, CDCl<sub>3</sub>)** δ 7.63 (br-s, 1H), 7.11 (s, 1H), 7.04 (s, 1H), 3.78 (s, 3H); **<sup>13</sup>C**

**NMR (100 MHz, CDCl<sub>3</sub>)** δ 141.6, 127.9, 117.5, 39.1; **EI-MS** *m/z* (rel intensity) 98 (M<sup>+</sup>,

100).

## 5. Computational details

### 5-1. General information

All calculations were carried with the Gaussian 16 (revision B.01) program package.<sup>S13</sup> The molecular structures and harmonic vibrational frequencies were obtained using the hybrid density functional method based on the M06-2X function.<sup>S14</sup> We used SDD basis set<sup>S15</sup> for Cu and I atoms and 6-31+G\* basis set<sup>S16</sup> for all other atoms. The self-consistent reaction field (SCRF) method based on the *solvation model based on density* (SMD)<sup>S17</sup> was employed to evaluate the solvent reaction field (water;  $\epsilon = 78.39$ ). Geometry optimization and vibrational analysis were performed at the same level. All stationary points were optimized without any symmetry assumptions, and characterized by normal coordinate analysis at the same level of theory (number of imaginary frequencies, NIMAG, 0 for minima and 1 for TSs). The intrinsic reaction coordinate (IRC) method was used to track minimum energy paths from transition structures to the corresponding local minima.<sup>S18</sup> Single point energies were calculated at the M06-2X/6-311+G\*<sup>S16</sup> level of theory and the self-consistent reaction field (SCRF) method based on the SMD was employed to evaluate the solvent reaction field (water;  $\epsilon = 78.39$ ).

### 5.2 Cartesian Coordinates and Energies

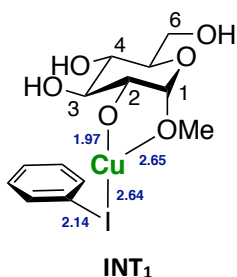

INT<sub>1</sub>

at M06-2X/6-31+G\*&SDD (for Cu & I)/SMD(water)

Energy = -1165.9982679999998 A.U.

Thermal correction to Gibbs Free Energy =

0.253816 A.U.

Sum of electronic and thermal Free Energies =

-1165.744452 A.U.

at M06-2X/6-311+G\*&SDD (for Cu & I)/SMD(water)

Energy = -1166.24631095

|   |             |            |             |
|---|-------------|------------|-------------|
| C | 0.70332900  | 1.99027700 | -1.00269700 |
| C | -1.51599500 | 1.58188300 | 0.05016900  |
| C | -1.29824600 | 2.00918800 | 1.35684900  |
| C | -0.22851900 | 2.86978100 | 1.61024800  |

|    |             |             |             |
|----|-------------|-------------|-------------|
| C  | 0.60322400  | 3.28719700  | 0.57096100  |
| C  | 0.36495300  | 2.84840700  | -0.73125300 |
| H  | -0.88875700 | 1.64704400  | -2.01524400 |
| H  | -1.93975200 | 1.67486700  | 2.16582600  |
| H  | -0.04523100 | 3.20488300  | 2.62692700  |
| H  | 1.43928400  | 3.94875500  | 0.77712400  |
| H  | 1.01166100  | 3.16629800  | -1.54458900 |
| O  | 0.62672100  | -1.02726500 | -1.37216100 |
| I  | -3.11268500 | 0.21394100  | -0.34283000 |
| Cu | -1.35661500 | -1.65734400 | 0.26913500  |
| H  | 1.10596400  | -1.55522000 | -3.32375900 |
| C  | 0.77804600  | -0.68402700 | -2.74322500 |
| H  | 1.50430300  | 0.12852000  | -2.86658700 |
| H  | -0.20008000 | -0.35701600 | -3.10104500 |
| C  | 1.68158500  | -1.79785700 | -0.86169300 |
| H  | 1.79553000  | -2.71216700 | -1.45808000 |
| O  | 2.92382800  | -1.12677600 | -0.98308500 |
| C  | 1.38936400  | -2.12334600 | 0.60788500  |
| C  | 2.99898400  | 0.10939700  | -0.26971500 |

|   |            |             |             |
|---|------------|-------------|-------------|
| H | 2.22706400 | -2.76670200 | 0.93546700  |
| C | 1.47443600 | -0.82974300 | 1.42872400  |
| O | 0.17361900 | -2.76977200 | 0.81664800  |
| H | 2.19619200 | 0.78116000  | -0.61366900 |
| C | 2.80955500 | -0.13879300 | 1.23364900  |
| C | 4.34001800 | 0.73105100  | -0.60517300 |
| H | 0.67683700 | -0.14165300 | 1.09308200  |
| O | 1.28302300 | -1.13376500 | 2.80352900  |
| H | 3.61866500 | -0.78272200 | 1.60661700  |
| O | 2.78545500 | 1.08593000  | 1.95745600  |
| H | 4.48547400 | 1.63889300  | -0.00845300 |
| H | 5.14343700 | 0.02515200  | -0.37333800 |
| O | 4.45455800 | 1.02696200  | -1.99229300 |
| H | 0.56159000 | -1.79076600 | 2.81971600  |
| H | 3.69513500 | 1.35822300  | 2.15543000  |
| H | 3.78475200 | 1.69353000  | -2.21945900 |

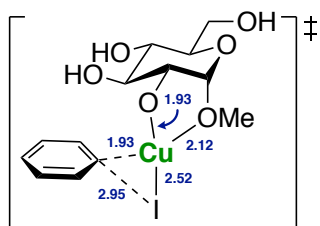

TS<sub>OA</sub>

at M06-2X/6-31+G\*&SDD (for Cu & I)/SMD(water)

Energy = -1165.963524 A.U.

Thermal correction to Gibbs Free Energy =

0.256212 A.U.

Sum of electronic and thermal Free Energies =

-1165.707312 A.U.

at M06-2X/6-311+G\*&SDD (for Cu & I)/SMD(water)

Energy = -1166.21056562

|   |             |            |             |
|---|-------------|------------|-------------|
| C | -2.26811200 | 1.64325100 | -0.98095800 |
| C | -2.30507400 | 0.82766900 | 0.13641600  |
| C | -3.20846700 | 0.96140700 | 1.17478300  |
| C | -4.13814700 | 2.00403900 | 1.08243100  |
| C | -4.13813600 | 2.85641600 | -0.02224600 |
| C | -3.20738100 | 2.67902100 | -1.04688700 |

|    |             |             |             |
|----|-------------|-------------|-------------|
| H  | -1.54207600 | 1.49483900  | -1.77461000 |
| H  | -3.20337000 | 0.29015600  | 2.02762400  |
| H  | -4.86303200 | 2.13833500  | 1.88020800  |
| H  | -4.86622400 | 3.65919400  | -0.08611200 |
| H  | -3.20481400 | 3.34132200  | -1.90788000 |
| O  | 1.19691600  | -1.07644000 | 0.68251000  |
| I  | -2.13538700 | -2.01031900 | -0.63938400 |
| Cu | -0.72868000 | -0.23009800 | 0.46110200  |
| H  | 1.30181900  | -2.66833200 | 2.00854200  |
| C  | 1.46279300  | -2.45507800 | 0.94644600  |
| H  | 2.49258800  | -2.69369300 | 0.66619700  |
| H  | 0.76779600  | -3.03289900 | 0.33740500  |
| C  | 1.99442200  | -0.17641200 | 1.44254200  |
| H  | 1.93916800  | -0.45492300 | 2.50039500  |
| O  | 3.35026600  | -0.26579600 | 1.09102000  |
| C  | 1.42029400  | 1.21630100  | 1.19213100  |
| C  | 3.65500100  | 0.09123400  | -0.26178200 |
| H  | 1.94259800  | 1.91201700  | 1.86869800  |
| C  | 1.71660200  | 1.63951800  | -0.25006600 |
| O  | 0.04454600  | 1.24386200  | 1.43833900  |
| H  | 3.13343400  | -0.59498700 | -0.94638100 |
| C  | 3.19551000  | 1.52697700  | -0.56269100 |
| C  | 5.15340600  | -0.08008000 | -0.42170500 |
| H  | 1.16712000  | 0.96639900  | -0.93247300 |
| O  | 1.28372300  | 2.97468600  | -0.46001200 |
| H  | 3.75908000  | 2.23463500  | 0.06153300  |
| O  | 3.37805800  | 1.82983200  | -1.93964600 |
| H  | 5.46344200  | 0.28723500  | -1.40617000 |
| H  | 5.66935900  | 0.50061600  | 0.34899000  |
| O  | 5.55733700  | -1.43214000 | -0.24669100 |
| H  | 0.36158200  | 3.01405300  | -0.14648000 |
| H  | 4.27368800  | 2.17636300  | -2.07625900 |
| H  | 5.23204000  | -1.94817400 | -1.00243900 |



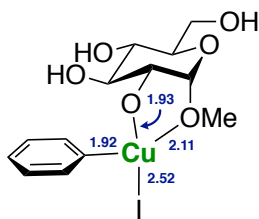

INT<sub>2</sub>

at M06-2X/6-31+G\*&SDD (for Cu & I)/SMD(water)

Energy = -1165.963579 A.U.

Thermal correction to Gibbs Free Energy =

0.253242 A.U.

Sum of electronic and thermal Free Energies =

-1165.710337 A.U.

at M06-2X/6-311+G\*&SDD (for Cu & I)/SMD(water)

Energy = -1166.21052346

|    |             |             |             |
|----|-------------|-------------|-------------|
| C  | -2.30758900 | 1.63705100  | -0.97187600 |
| C  | -2.32882100 | 0.81481900  | 0.14075300  |
| C  | -3.24374200 | 0.91440300  | 1.17251300  |
| C  | -4.20485000 | 1.92844500  | 1.07784300  |
| C  | -4.22140800 | 2.78708400  | -0.02165100 |
| C  | -3.27822200 | 2.64334200  | -1.04036600 |
| H  | -1.56901500 | 1.51747500  | -1.75885900 |
| H  | -3.22365800 | 0.24053400  | 2.02311100  |
| H  | -4.93903700 | 2.03690300  | 1.87109000  |
| H  | -4.97157700 | 3.56930800  | -0.08568600 |
| H  | -3.28829600 | 3.31150200  | -1.89677000 |
| O  | 1.18488900  | -1.03709300 | 0.73808600  |
| I  | -2.03562000 | -2.05116700 | -0.65697600 |
| Cu | -0.73884000 | -0.21394700 | 0.47204600  |
| H  | 1.32245500  | -2.59904600 | 2.09623400  |
| C  | 1.47459500  | -2.40555900 | 1.02910400  |
| H  | 2.50680700  | -2.63250600 | 0.74813700  |
| H  | 0.78694600  | -3.00731400 | 0.43526500  |
| C  | 1.97627000  | -0.10797200 | 1.46745600  |
| H  | 1.92783700  | -0.35496300 | 2.53338200  |
| O  | 3.33123300  | -0.19639000 | 1.11251400  |
| C  | 1.38661200  | 1.27037400  | 1.17593600  |
| C  | 3.62342900  | 0.11947700  | -0.25320900 |

|   |            |             |             |
|---|------------|-------------|-------------|
| H | 1.89680900 | 1.99032300  | 1.83604500  |
| C | 1.68335100 | 1.66218100  | -0.27530800 |
| O | 0.00923500 | 1.28875400  | 1.41797500  |
| H | 3.09235700 | -0.58415300 | -0.91243800 |
| C | 3.16271700 | 1.54726100  | -0.58590500 |
| C | 5.11887500 | -0.06400200 | -0.42569100 |
| H | 1.13593600 | 0.97270600  | -0.94287000 |
| O | 1.24654700 | 2.99123700  | -0.51351000 |
| H | 3.72501500 | 2.26857500  | 0.02365600  |
| O | 3.34373000 | 1.82237500  | -1.96862600 |
| H | 5.41815900 | 0.27025100  | -1.42512800 |
| H | 5.64804400 | 0.53702300  | 0.31999300  |
| O | 5.51702600 | -1.41241600 | -0.21352900 |
| H | 0.32508700 | 3.03585800  | -0.19881900 |
| H | 4.24083300 | 2.16191300  | -2.11313700 |
| H | 5.17094600 | -1.95121900 | -0.94369000 |

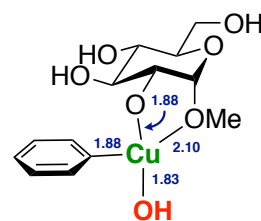

INT<sub>3OH</sub>

at M06-2X/6-31+G\*&SDD (for Cu)/SMD(water)

Energy = -1230.34568 A.U.

Thermal correction to Gibbs Free Energy =

0.268959 A.U.

Sum of electronic and thermal Free Energies =

-1230.076721 A.U.

at M06-2X/6-311+G\*&SDD (for Cu)/SMD(water)

Energy = -1230.61635332

|   |             |             |             |
|---|-------------|-------------|-------------|
| C | -2.86253700 | 1.04777500  | -0.86742800 |
| C | -2.77045800 | -0.13186300 | -0.14826700 |
| C | -3.81256000 | -0.68810800 | 0.57159200  |
| C | -5.03434200 | -0.00391500 | 0.56875900  |
| C | -5.17189300 | 1.19011000  | -0.13955000 |
| C | -4.09360500 | 1.71343500  | -0.85507500 |

|    |             |             |             |
|----|-------------|-------------|-------------|
| H  | -2.01570800 | 1.44982600  | -1.41627300 |
| H  | -3.69460500 | -1.61815800 | 1.11922500  |
| H  | -5.87388600 | -0.41253900 | 1.12377000  |
| H  | -6.12226900 | 1.71499400  | -0.13426400 |
| H  | -4.20045200 | 2.64410600  | -1.40488600 |
| O  | 0.94732900  | -1.49321900 | -0.00705400 |
| Cu | -1.09064300 | -0.98229800 | -0.08260300 |
| H  | 1.31319300  | -3.43776100 | 0.61759200  |
| C  | 1.45519000  | -2.80380300 | -0.26363500 |
| H  | 2.51655300  | -2.74516900 | -0.52022000 |
| H  | 0.89112200  | -3.19928000 | -1.10819900 |
| C  | 1.52962000  | -0.83788200 | 1.11058200  |
| H  | 1.49895400  | -1.50690300 | 1.97704900  |
| O  | 2.88431900  | -0.54962800 | 0.89271800  |
| C  | 0.68761200  | 0.41711000  | 1.33218600  |
| C  | 3.14881800  | 0.35641600  | -0.18479300 |
| H  | 1.00343400  | 0.86572800  | 2.28631400  |
| C  | 0.94868100  | 1.43327600  | 0.21755000  |
| O  | -0.67497800 | 0.09099500  | 1.40024700  |
| H  | 2.78186700  | -0.07923600 | -1.12651600 |
| C  | 2.43358300  | 1.69505100  | 0.05157700  |
| C  | 4.65662900  | 0.50696400  | -0.25346900 |
| H  | 0.56155500  | 1.02558400  | -0.73182700 |
| O  | 0.28697900  | 2.65418000  | 0.51117900  |
| H  | 2.82800600  | 2.16830600  | 0.96181500  |
| O  | 2.60008800  | 2.55708700  | -1.06567900 |
| H  | 4.91881400  | 1.27205900  | -0.99225400 |
| H  | 5.03536600  | 0.81796100  | 0.72495400  |
| O  | 5.29876600  | -0.72319100 | -0.56245600 |
| H  | -0.64697000 | 2.43497100  | 0.67949800  |
| H  | 3.42071300  | 3.06350300  | -0.96172600 |
| H  | 5.09763900  | -0.94963400 | -1.48510900 |
| O  | -1.57699900 | -2.08956800 | -1.45904300 |
| H  | -2.49715200 | -1.96236000 | -1.73293400 |

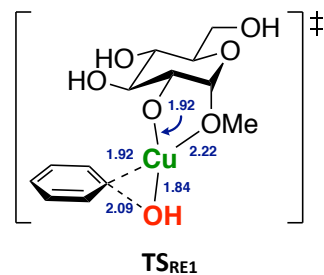

at M06-2X/6-31+G\*&SDD (for Cu)/SMD(water)

Energy = -1230.3369969999999 A.U.

Thermal correction to Gibbs Free Energy =

0.269901 A.U.

Sum of electronic and thermal Free Energies =

-1230.067096 A.U.

at M06-2X/6-311+G\*&SDD (for Cu)/SMD(water)

Energy = -1230.60798551 A.U.

|    |             |             |             |
|----|-------------|-------------|-------------|
| C  | -2.88753000 | 0.94069400  | -1.00932700 |
| C  | -2.88405900 | -0.26962200 | -0.33438600 |
| C  | -3.92554300 | -0.73254000 | 0.45022600  |
| C  | -5.04526500 | 0.09794700  | 0.57692500  |
| C  | -5.09171500 | 1.33191000  | -0.07187000 |
| C  | -4.01647400 | 1.75052600  | -0.85921000 |
| H  | -2.04697200 | 1.25125800  | -1.62263200 |
| H  | -3.87658500 | -1.69322300 | 0.95311600  |
| H  | -5.87903300 | -0.23101700 | 1.19045100  |
| H  | -5.96542700 | 1.96728100  | 0.03344900  |
| H  | -4.04835600 | 2.71145500  | -1.36458300 |
| O  | 1.01851400  | -1.50379000 | -0.04652500 |
| Cu | -1.13902200 | -0.99277000 | -0.00855600 |
| H  | 1.46926800  | -3.44897400 | 0.51901200  |
| C  | 1.53505800  | -2.79471700 | -0.35729500 |
| H  | 2.57570100  | -2.71812000 | -0.68761600 |
| H  | 0.92048300  | -3.19226400 | -1.16615000 |
| C  | 1.60478500  | -0.88920100 | 1.08195200  |
| H  | 1.60040200  | -1.59019500 | 1.92455700  |
| O  | 2.95810200  | -0.57389500 | 0.85652500  |
| C  | 0.76818700  | 0.35705100  | 1.38037600  |
| C  | 3.18906100  | 0.35384700  | -0.20836500 |
| H  | 1.15737000  | 0.78539500  | 2.31884800  |

|   |             |             |             |
|---|-------------|-------------|-------------|
| C | 0.98407700  | 1.38875400  | 0.26884900  |
| O | -0.58873900 | 0.05064600  | 1.50859300  |
| H | 2.80919600  | -0.06914700 | -1.15096900 |
| C | 2.45890800  | 1.67781300  | 0.06507600  |
| C | 4.69279900  | 0.52637000  | -0.30719800 |
| H | 0.57463800  | 0.98492600  | -0.67287600 |
| O | 0.30562300  | 2.59362100  | 0.59523700  |
| H | 2.87012300  | 2.14476700  | 0.97120200  |
| O | 2.58443700  | 2.55997600  | -1.04304100 |
| H | 4.92895200  | 1.30529400  | -1.04050300 |
| H | 5.08964400  | 0.82794000  | 0.66698500  |
| O | 5.34529900  | -0.69051600 | -0.64785900 |
| H | -0.59588000 | 2.33186600  | 0.85770300  |
| H | 3.40618100  | 3.06783700  | -0.95610400 |
| H | 5.11217900  | -0.91672800 | -1.56309700 |
| O | -1.97326800 | -1.77186900 | -1.45793400 |
| H | -2.56371500 | -2.47442000 | -1.13718200 |

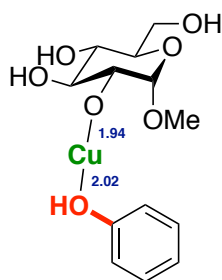

INT<sub>4</sub>

at M06-2X/6-31+G\*&SDD (for Cu & I)/SMD(water)

Energy = -1230.430088 A.U.

Thermal correction to Gibbs Free Energy =

0.270096 A.U.

Sum of electronic and thermal Free Energies =

-1230.159992 A.U.

at M06-2X/6-311+G\*&SDD (for Cu)/SMD(water)

Energy = -1230.70096939 A.U.

|   |             |            |             |
|---|-------------|------------|-------------|
| C | -2.14177900 | 1.08020700 | -0.60659900 |
| C | -3.19291700 | 0.29826300 | -0.13369600 |
| C | -4.31484300 | 0.86955100 | 0.45859300  |
| C | -4.37662500 | 2.25783000 | 0.58368900  |

|    |             |             |             |
|----|-------------|-------------|-------------|
| C  | -3.33403300 | 3.06011600  | 0.11896800  |
| C  | -2.21921500 | 2.46535700  | -0.47579700 |
| H  | -1.27793800 | 0.59619200  | -1.05827900 |
| H  | -5.12317900 | 0.23701900  | 0.81586800  |
| H  | -5.24810800 | 2.70958100  | 1.04806100  |
| H  | -3.38871900 | 4.13929800  | 0.22088900  |
| H  | -1.40075300 | 3.07962200  | -0.84021300 |
| O  | 0.84250800  | -0.34133300 | -1.63471600 |
| Cu | -1.27983800 | -1.95824200 | -0.23524500 |
| H  | 1.65562000  | -0.25866700 | -3.54429400 |
| C  | 1.14304400  | 0.38523200  | -2.81866500 |
| H  | 1.77138200  | 1.25595100  | -2.59928500 |
| H  | 0.19142400  | 0.72039400  | -3.23528100 |
| C  | 1.95077900  | -0.99705000 | -1.08111200 |
| H  | 2.40341100  | -1.66130400 | -1.82870000 |
| O  | 2.97821400  | -0.08335300 | -0.73443600 |
| C  | 1.50039200  | -1.77752000 | 0.15796300  |
| C  | 2.59500200  | 0.89794700  | 0.23036300  |
| H  | 2.41016200  | -2.28629700 | 0.52640200  |
| C  | 1.07617200  | -0.78125300 | 1.24356500  |
| O  | 0.49898200  | -2.71300000 | -0.09494100 |
| H  | 1.74121100  | 1.47933200  | -0.15330200 |
| C  | 2.17179700  | 0.22262200  | 1.54310200  |
| C  | 3.78587200  | 1.81997000  | 0.40976500  |
| H  | 0.18939100  | -0.22501500 | 0.89034100  |
| O  | 0.73984500  | -1.48894200 | 2.42976500  |
| H  | 3.03443300  | -0.29423400 | 1.98682200  |
| O  | 1.64921500  | 1.17965800  | 2.45773100  |
| H  | 3.58051900  | 2.53933900  | 1.21045200  |
| H  | 4.66626200  | 1.23073100  | 0.68391700  |
| O  | 4.11838800  | 2.49956300  | -0.79490600 |
| H  | 0.20029000  | -2.24575400 | 2.13163900  |
| H  | 2.37882200  | 1.57883900  | 2.95671000  |
| H  | 3.38939400  | 3.10129400  | -1.01819900 |
| O  | -3.09048300 | -1.07497200 | -0.29336300 |
| H  | -3.81355500 | -1.53591300 | 0.16665400  |

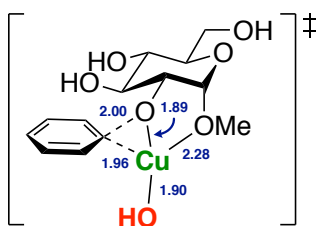

**TS<sub>RE2</sub>**

at M06-2X/6-31+G\*&SDD (for Cu & I)/SMD(water)

Energy = -1230.328143 A.U.

Thermal correction to Gibbs Free Energy =

0.269401 A.U.

Sum of electronic and thermal Free Energies =

-1230.058742 A.U.

at M06-2X/6-311+G\*&SDD (for Cu)/SMD(water)

Energy = -1230.59922519

|    |             |             |             |
|----|-------------|-------------|-------------|
| C  | 2.44469300  | -0.91756200 | -0.97877200 |
| C  | 2.41247300  | -0.09158400 | 0.13188700  |
| C  | 3.45092100  | 0.04447100  | 1.03884800  |
| C  | 4.61045500  | -0.69170200 | 0.79775000  |
| C  | 4.69373800  | -1.54756100 | -0.30508700 |
| C  | 3.61991000  | -1.65598200 | -1.18397000 |
| H  | 1.62376100  | -0.97950400 | -1.68499800 |
| H  | 3.35906800  | 0.69215800  | 1.90452600  |
| H  | 5.44520700  | -0.60174300 | 1.48665600  |
| H  | 5.59583700  | -2.12625700 | -0.47592700 |
| H  | 3.67924300  | -2.30860000 | -2.05010100 |
| O  | -1.09013400 | 1.55504200  | -0.12992600 |
| Cu | 1.18239700  | 1.42379800  | -0.08656200 |
| H  | -1.63809200 | 3.43351900  | 0.56270000  |
| C  | -1.76205200 | 2.79854500  | -0.32151300 |
| H  | -2.82648900 | 2.63109700  | -0.51392300 |
| H  | -1.30084300 | 3.27326000  | -1.18843000 |
| C  | -1.48265000 | 0.86115900  | 1.02956500  |
| H  | -1.47276200 | 1.53792000  | 1.89123500  |
| O  | -2.80213100 | 0.38339000  | 0.93440900  |
| C  | -0.48977200 | -0.28916900 | 1.22283200  |
| C  | -3.01964700 | -0.53421300 | -0.14090600 |
| H  | -0.71500300 | -0.76112100 | 2.18952800  |

|   |             |             |             |
|---|-------------|-------------|-------------|
| C | -0.67086700 | -1.34604700 | 0.13468500  |
| O | 0.83341300  | 0.20193800  | 1.31880000  |
| H | -2.76863000 | -0.04758300 | -1.09536900 |
| C | -2.12863800 | -1.77062000 | 0.03353400  |
| C | -4.49740600 | -0.87676700 | -0.12695400 |
| H | -0.37946900 | -0.92235400 | -0.83810300 |
| O | 0.10029700  | -2.50073800 | 0.42288500  |
| H | -2.41507200 | -2.30273400 | 0.95149500  |
| O | -2.24066100 | -2.62950100 | -1.09210100 |
| H | -4.69881300 | -1.66802600 | -0.85767700 |
| H | -4.77921000 | -1.23631700 | 0.86732400  |
| O | -5.30726300 | 0.26172700  | -0.38856700 |
| H | 1.04120800  | -2.25326600 | 0.41581700  |
| H | -2.98198700 | -3.23973600 | -0.95602300 |
| H | -5.16183100 | 0.53524600  | -1.30919000 |
| O | 1.96522100  | 2.47176000  | -1.46308300 |
| H | 1.34748800  | 3.20714700  | -1.59997700 |

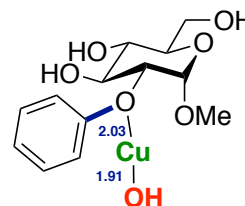

**INT<sub>5</sub>**

at M06-2X/6-31+G\*&SDD (for Cu)/SMD(water)

Energy = -1230.422456 A.U.

Thermal correction to Gibbs Free Energy =

0.269591 A.U.

Sum of electronic and thermal Free Energies =

-1230.152865 A.U.

at M06-2X/6-311+G\*&SDD (for Cu)/SMD(water)

Energy = -1230.6930125 A.U.

|   |             |             |             |
|---|-------------|-------------|-------------|
| C | -3.36909800 | -0.30751700 | 0.52514800  |
| C | -2.24284400 | -0.83728000 | -0.09796500 |
| C | -2.26368400 | -2.09835000 | -0.68764000 |
| C | -3.44370100 | -2.84164100 | -0.63827900 |
| C | -4.58363700 | -2.32652100 | -0.02069000 |

|    |             |             |             |
|----|-------------|-------------|-------------|
| C  | -4.54367600 | -1.05648800 | 0.55715200  |
| H  | -3.30944900 | 0.68292800  | 0.97189100  |
| H  | -1.38257000 | -2.49081800 | -1.18635300 |
| H  | -3.46909500 | -3.82561700 | -1.09656900 |
| H  | -5.49827500 | -2.91029000 | 0.00819300  |
| H  | -5.42498700 | -0.64649400 | 1.04091000  |
| O  | 1.13687600  | 0.65762200  | -1.59301500 |
| Cu | -1.31612600 | 1.98816700  | -0.15837500 |
| H  | 1.47673600  | 0.05891400  | -3.55316000 |
| C  | 1.88118200  | 0.75057900  | -2.80471200 |
| H  | 2.93912500  | 0.52580100  | -2.63149900 |
| H  | 1.77886400  | 1.77711300  | -3.15785300 |
| C  | 1.03827100  | -0.65219900 | -1.11289900 |
| H  | 0.62747800  | -1.31395100 | -1.88507000 |
| O  | 2.29307500  | -1.20101600 | -0.77309800 |
| C  | 0.16490600  | -0.63477100 | 0.13572300  |
| C  | 3.01055900  | -0.46468900 | 0.22255800  |
| H  | 0.00528500  | -1.66571900 | 0.46669400  |
| C  | 0.82379700  | 0.15457700  | 1.26020300  |
| O  | -1.10810600 | -0.03552200 | -0.14412700 |
| H  | 3.17927500  | 0.56363600  | -0.13035500 |
| C  | 2.20928300  | -0.40964300 | 1.53284300  |
| C  | 4.34617100  | -1.16333600 | 0.39542000  |
| H  | 0.92232300  | 1.20818000  | 0.95506600  |
| O  | 0.04501800  | 0.06733900  | 2.44048300  |
| H  | 2.10731000  | -1.42401900 | 1.94381700  |
| O  | 2.84247700  | 0.44389500  | 2.47259900  |
| H  | 4.89450100  | -0.70942900 | 1.22864900  |
| H  | 4.17768100  | -2.22102000 | 0.61951400  |
| O  | 5.12325300  | -1.12232700 | -0.79421200 |
| H  | -0.78863500 | 0.54449600  | 2.28004200  |
| H  | 3.48606700  | -0.06945200 | 2.98570200  |
| H  | 5.37754000  | -0.19978700 | -0.96142500 |
| O  | -1.61110700 | 3.87814600  | -0.14425200 |
| H  | -0.86856300 | 4.27724100  | -0.62149900 |

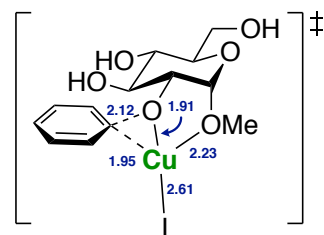

TS<sub>RE4</sub>

at M06-2X/6-31+G\*&SDD (for Cu & I)/SMD(water)

Energy = -1165.954966 A.U.

Thermal correction to Gibbs Free Energy =

0.253873 A.U.

Sum of electronic and thermal Free Energies =

-1165.701093 A.U.

at M06-2X/6-311+G\*&SDD (for Cu & I)/SMD(water)

Energy = -1166.20141351 A.U.

|    |             |             |             |
|----|-------------|-------------|-------------|
| C  | 1.77120800  | 1.92000900  | 0.93243300  |
| C  | 1.78824400  | 1.39799100  | -0.34543100 |
| C  | 2.68064200  | 1.72669300  | -1.34442600 |
| C  | 3.67629300  | 2.64719500  | -1.00633400 |
| C  | 3.72054800  | 3.21023100  | 0.27206500  |
| C  | 2.77698600  | 2.85065300  | 1.23208700  |
| H  | 1.04708300  | 1.61386900  | 1.68151100  |
| H  | 2.61244700  | 1.29610000  | -2.33804500 |
| H  | 4.40989900  | 2.92836900  | -1.75595600 |
| H  | 4.49129000  | 3.93404200  | 0.51669100  |
| H  | 2.81045300  | 3.28065200  | 2.22874600  |
| O  | -1.18991800 | -1.20582800 | -0.62081400 |
| I  | 2.33406000  | -2.16225400 | 0.58890700  |
| Cu | 0.84318700  | -0.30543800 | -0.48405200 |
| H  | -1.30147600 | -2.79855600 | -1.94583800 |
| C  | 1.47471200  | -2.57872100 | -0.88664900 |
| H  | -2.51144700 | -2.80663700 | -0.62134800 |
| H  | -0.79599000 | -3.16565200 | -0.26739700 |
| C  | -1.94315700 | -0.30099000 | -1.39692600 |
| H  | -1.89260700 | -0.58768200 | -2.45307400 |
| O  | -3.30747300 | -0.33573400 | -1.05688800 |
| C  | -1.34247100 | 1.09211400  | -1.17374700 |

|   |             |             |             |
|---|-------------|-------------|-------------|
| C | -3.59422800 | 0.01693100  | 0.29877700  |
| H | -1.83347900 | 1.78311200  | -1.87423300 |
| C | -1.63718100 | 1.56798600  | 0.24777900  |
| O | 0.03341400  | 1.10158700  | -1.48935600 |
| H | -3.06960600 | -0.67137600 | 0.97804400  |
| C | -3.12217400 | 1.44596300  | 0.56050300  |
| C | -5.09182600 | -0.13607500 | 0.48347400  |
| H | -1.07778400 | 0.93998100  | 0.96108300  |
| O | -1.28837600 | 2.93259800  | 0.42085000  |
| H | -3.68174400 | 2.13290500  | -0.09287900 |
| O | -3.37383800 | 1.75018900  | 1.92312300  |
| H | -5.37707200 | 0.23192600  | 1.47414100  |
| H | -5.61353800 | 0.45390900  | -0.27609600 |
| O | -5.51158500 | -1.48321000 | 0.30748600  |
| H | -0.32374200 | 3.02546900  | 0.33595300  |
| H | -3.01500800 | 2.63635500  | 2.10077300  |
| H | -5.18211700 | -2.00631700 | 1.05651100  |

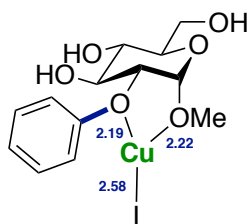

INT<sub>5</sub>

at M06-2X/6-31+G\*&SDD (for Cu & I)/SMD(water)

Energy = -1166.059562 A.U.

Thermal correction to Gibbs Free Energy =

0.256807 A.U.

Sum of electronic and thermal Free Energies =

-1165.802755 A.U.

at M06-2X/6-311+G\*&SDD (for Cu & I)/SMD(water)

Energy = -1166.30548572 A.U.

|   |            |            |             |
|---|------------|------------|-------------|
| C | 1.57036900 | 2.45315800 | 0.34867500  |
| C | 0.52634400 | 2.35029600 | -0.56587200 |
| C | 0.07641900 | 3.45671900 | -1.28239300 |
| C | 0.68134400 | 4.69283800 | -1.05745800 |
| C | 1.72557200 | 4.81699400 | -0.13872900 |

|    |             |             |             |
|----|-------------|-------------|-------------|
| C  | 2.17115800  | 3.69429800  | 0.55958500  |
| H  | 1.89597600  | 1.56041500  | 0.88003300  |
| H  | -0.72708100 | 3.35457600  | -2.00562800 |
| H  | 0.33757500  | 5.56127100  | -1.61136300 |
| H  | 2.19150700  | 5.78318600  | 0.02804800  |
| H  | 2.98501500  | 3.78081100  | 1.27317500  |
| O  | -0.94261000 | -1.40326900 | -0.68329100 |
| I  | 3.39706800  | -1.77283600 | 0.33872800  |
| Cu | 1.10475100  | -0.69964300 | -0.18278100 |
| H  | -0.79733900 | -2.59272600 | -2.37940600 |
| C  | -1.03101900 | -2.68289600 | -1.31299700 |
| H  | -2.03331500 | -3.10281500 | -1.18332900 |
| H  | -0.29496300 | -3.32040100 | -0.82241800 |
| C  | -1.75907300 | -0.42360100 | -1.27701000 |
| H  | -1.58358200 | -0.38999000 | -2.35771600 |
| O  | -3.12391200 | -0.71412500 | -1.11330400 |
| C  | -1.42122900 | 0.91338000  | -0.61825300 |
| C  | -3.54442000 | -0.83394400 | 0.24954300  |
| H  | -1.96312600 | 1.70483100  | -1.14632100 |
| C  | -1.82237900 | 0.88907000  | 0.85369800  |
| O  | -0.01073500 | 1.08715500  | -0.78200600 |
| H  | -2.97688000 | -1.63767400 | 0.74078700  |
| C  | -3.28874700 | 0.48379700  | 0.97787600  |
| C  | -5.01590400 | -1.20006600 | 0.22092800  |
| H  | -1.20025500 | 0.15662500  | 1.38666800  |
| O  | -1.69764900 | 2.16625100  | 1.46429400  |
| H  | -3.90914200 | 1.27108600  | 0.52208000  |
| O  | -3.63963400 | 0.30867300  | 2.33952000  |
| H  | -5.41323200 | -1.19216200 | 1.24101100  |
| H  | -5.56257900 | -0.46458700 | -0.37683400 |
| O  | -5.23286900 | -2.46269700 | -0.39494400 |
| H  | -0.78702100 | 2.28438600  | 1.78118600  |
| H  | -3.41286000 | 1.12921400  | 2.81007700  |
| H  | -4.86245400 | -3.15222100 | 0.18029900  |

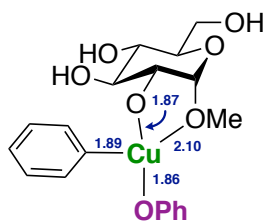

**INT<sub>30Ph</sub>**

at M06-2X/6-31+G\*&SDD (for Cu)/SMD(water)

Energy = -1461.307181 A.U.

Thermal correction to Gibbs Free Energy =

0.345813 A.U.

Sum of electronic and thermal Free Energies =

-1460.961368 A.U.

at M06-2X/6-311+G\*&SDD (for Cu)/SMD(water)

Energy = -1461.62517189 A.U.

|    |             |             |             |
|----|-------------|-------------|-------------|
| C  | 1.54890900  | 2.54990400  | 0.84234100  |
| C  | 1.77919600  | 1.53665200  | -0.07020200 |
| C  | 2.84798900  | 1.48850500  | -0.94327200 |
| C  | 3.76285300  | 2.54854200  | -0.88765600 |
| C  | 3.57809700  | 3.59270800  | 0.01850000  |
| C  | 2.47867500  | 3.59546500  | 0.87915100  |
| H  | 0.68741900  | 2.54082700  | 1.50405100  |
| H  | 2.98269100  | 0.66897200  | -1.64377000 |
| H  | 4.61678100  | 2.54843200  | -1.55899300 |
| H  | 4.29242000  | 4.40959900  | 0.05344100  |
| H  | 2.33509400  | 4.40977900  | 1.58346100  |
| O  | -1.10650000 | -1.20031900 | -0.26639900 |
| Cu | 0.50675200  | 0.14454000  | -0.15691000 |
| H  | -0.58641900 | -2.93126600 | -1.28692500 |
| C  | -0.91605600 | -2.61643900 | -0.29137500 |
| H  | -1.85092000 | -3.11917000 | -0.02749900 |
| H  | -0.15010200 | -2.84403900 | 0.45059500  |
| C  | -2.00877000 | -0.70339300 | -1.24436700 |
| H  | -1.76552200 | -1.14254800 | -2.21751400 |
| O  | -3.32976300 | -1.08114300 | -0.96576200 |
| C  | -1.81852400 | 0.81248500  | -1.24342600 |
| C  | -3.85467700 | -0.57725000 | 0.26816000  |
| H  | -2.39162600 | 1.22069200  | -2.08971800 |

|   |             |             |             |
|---|-------------|-------------|-------------|
| C | -2.38234400 | 1.41096800  | 0.04807400  |
| O | -0.46407300 | 1.14684800  | -1.40251700 |
| H | -3.24639100 | -0.95442700 | 1.10412700  |
| C | -3.81210900 | 0.95829000  | 0.28096000  |
| C | -5.26416900 | -1.12361300 | 0.38812700  |
| H | -1.76758200 | 1.06453200  | 0.89672700  |
| O | -2.34355900 | 2.82803400  | -0.01517600 |
| H | -4.45638600 | 1.35120700  | -0.51818100 |
| O | -4.22756400 | 1.46169500  | 1.54308900  |
| H | -5.75757900 | -0.68107800 | 1.26044000  |
| H | -5.83400800 | -0.86308900 | -0.50893400 |
| O | -5.27645700 | -2.54270700 | 0.47584900  |
| H | -1.43002500 | 3.07359300  | -0.24679500 |
| H | -5.19227000 | 1.56377800  | 1.54530300  |
| H | -4.87953100 | -2.79973300 | 1.32441600  |
| O | 1.51407700  | -0.78589300 | 1.10088500  |
| C | 2.60473800  | -1.46056200 | 0.70592700  |
| C | 3.65432700  | -1.66663400 | 1.61994200  |
| C | 2.72682700  | -1.99419700 | -0.59065800 |
| C | 4.78109100  | -2.39632000 | 1.24705900  |
| H | 3.56538200  | -1.25026900 | 2.61989600  |
| C | 3.86234400  | -2.71380600 | -0.95691300 |
| H | 1.91860000  | -1.82407300 | -1.30164800 |
| C | 4.89638500  | -2.92412600 | -0.04161700 |
| H | 5.57931700  | -2.54789900 | 1.96890900  |
| H | 3.93771100  | -3.11360800 | -1.96467300 |
| H | 5.77917400  | -3.48705900 | -0.32859200 |

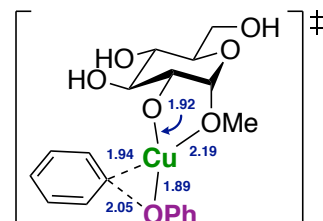

**TS<sub>RES</sub>**

at M06-2X/6-31+G\*&SDD (for Cu)/SMD(water)

Energy = -1461.2978859999999 A.U.

Thermal correction to Gibbs Free Energy =

0.34469 A.U.

Sum of electronic and thermal Free Energies =  
 -1460.953196 A.U.  
 at M06-2X/6-311+G\*&SDD (for Cu)/SMD(water)  
 Energy = -1461.61603848 A.U.

|    |             |             |             |
|----|-------------|-------------|-------------|
| C  | -1.49152900 | 2.33503000  | -0.99468200 |
| C  | -1.89573800 | 1.32882700  | -0.13545200 |
| C  | -2.91625900 | 1.43173000  | 0.78852900  |
| C  | -3.56554800 | 2.66955000  | 0.87367500  |
| C  | -3.19068800 | 3.72545400  | 0.04287600  |
| C  | -2.15954500 | 3.55841800  | -0.88503900 |
| H  | -0.69328100 | 2.18507800  | -1.71534600 |
| H  | -3.19962500 | 0.59801700  | 1.42552000  |
| H  | -4.36583300 | 2.79638700  | 1.59700900  |
| H  | -3.70469500 | 4.67872300  | 0.11447500  |
| H  | -1.86833400 | 4.37835600  | -1.53511600 |
| O  | 1.22589200  | -1.32310500 | 0.12799200  |
| Cu | -0.52465800 | -0.00544900 | 0.21505100  |
| H  | 0.81224000  | -3.19144700 | 0.93320800  |
| C  | 1.10568700  | -2.73600200 | -0.01907000 |
| H  | 2.05397800  | -3.16351500 | -0.35959000 |
| H  | 0.33307300  | -2.90882400 | -0.76989900 |
| C  | 2.10047000  | -0.90654000 | 1.15743700  |
| H  | 1.88372200  | -1.47090800 | 2.07160900  |
| O  | 3.44294400  | -1.18929800 | 0.84325800  |
| C  | 1.86243100  | 0.59322700  | 1.35426200  |
| C  | 3.94249900  | -0.52415100 | -0.32149000 |
| H  | 2.46912700  | 0.89938000  | 2.22281700  |
| C  | 2.38046300  | 1.35274300  | 0.12958100  |
| O  | 0.51277500  | 0.87821500  | 1.57463700  |
| H  | 3.35511500  | -0.83342600 | -1.19946200 |
| C  | 3.82508600  | 0.99999800  | -0.16677600 |
| C  | 5.37867300  | -0.98117000 | -0.49301000 |
| H  | 1.76766000  | 1.07383100  | -0.74471900 |
| O  | 2.27137300  | 2.75171200  | 0.35073400  |
| H  | 4.46254100  | 1.33730700  | 0.66270200  |
| O  | 4.19893800  | 1.65523500  | -1.37261800 |
| H  | 5.85511000  | -0.41162800 | -1.29871100 |

|   |             |             |             |
|---|-------------|-------------|-------------|
| H | 5.92983400  | -0.80452700 | 0.43567200  |
| O | 5.46362200  | -2.37655300 | -0.75397600 |
| H | 1.36887000  | 2.90203400  | 0.68662300  |
| H | 5.15724100  | 1.80474400  | -1.37189500 |
| H | 5.10036900  | -2.54329500 | -1.63919800 |
| O | -1.82699000 | -0.49432900 | -1.06268900 |
| C | -2.89125900 | -1.23455100 | -0.66062800 |
| C | -4.09650600 | -1.10932200 | -1.36545700 |
| C | -2.80851200 | -2.12168500 | 0.42174700  |
| C | -5.19510400 | -1.88686600 | -1.00523800 |
| H | -4.15168600 | -0.40546500 | -2.19158100 |
| C | -3.91538600 | -2.88897800 | 0.77984100  |
| H | -1.86877400 | -2.19518200 | 0.96781300  |
| C | -5.11141700 | -2.77841700 | 0.06717500  |
| H | -6.12360300 | -1.79071100 | -1.56095900 |
| H | -3.84177400 | -3.57670400 | 1.61745600  |
| H | -5.97153500 | -3.37898400 | 0.34670800  |

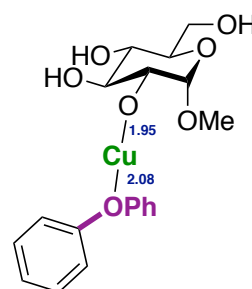

INT<sub>7</sub>

at M06-2X/6-31+G\*&SDD (for Cu)/SMD(water)  
 Energy = -1461.378656 A.U.

Thermal correction to Gibbs Free Energy =  
 0.346054 A.U.

Sum of electronic and thermal Free Energies =  
 -1461.032602 A.U.

at M06-2X/6-311+G\*&SDD (for Cu & I)/SMD(water)  
 Energy = -1461.69639014 A.U.

|   |             |            |             |
|---|-------------|------------|-------------|
| C | -0.47780300 | 1.51298500 | -1.50574500 |
| C | -1.36833200 | 1.18606400 | -0.49134900 |
| C | -1.36732500 | 1.84262400 | 0.73540200  |



|    |             |             |             |
|----|-------------|-------------|-------------|
| C  | -0.43211400 | 2.85556500  | 0.94400600  |
| C  | 0.48578200  | 3.19114400  | -0.05384300 |
| C  | 0.46068300  | 2.51888200  | -1.27671600 |
| H  | -0.50709400 | 0.96204900  | -2.44131400 |
| H  | -2.06775900 | 1.55543500  | 1.51432800  |
| H  | -0.41149800 | 3.37137500  | 1.89925100  |
| H  | 1.21964100  | 3.97143000  | 0.12340400  |
| H  | 1.17380600  | 2.77130500  | -2.05662500 |
| O  | 1.70063100  | -0.76691200 | -1.61945500 |
| Cu | -0.99551000 | -1.60198200 | -0.46564700 |
| H  | 2.84829400  | -1.10274600 | -3.31797000 |
| C  | 2.36877900  | -0.27881300 | -2.77426500 |
| H  | 3.12646800  | 0.46746700  | -2.50808000 |
| H  | 1.61114900  | 0.18426900  | -3.40931500 |
| C  | 2.49868600  | -1.58758400 | -0.81059100 |
| H  | 2.86836000  | -2.44145400 | -1.39333500 |
| O  | 3.66691400  | -0.91327900 | -0.37322600 |
| C  | 1.67035900  | -2.04934400 | 0.39389300  |
| C  | 3.41947200  | 0.25614300  | 0.40945500  |
| H  | 2.34101900  | -2.71107600 | 0.97259900  |
| C  | 1.37399000  | -0.83080400 | 1.27878000  |
| O  | 0.50683400  | -2.73576800 | 0.04667000  |
| H  | 2.81242500  | 0.96990400  | -0.17212700 |
| C  | 2.64197900  | -0.10537800 | 1.68281900  |
| C  | 4.77111700  | 0.87841400  | 0.70046800  |
| H  | 0.74730300  | -0.12184400 | 0.70939500  |
| O  | 0.66931000  | -1.24490800 | 2.44240600  |
| H  | 3.25546000  | -0.75392300 | 2.32412200  |
| O  | 2.26168800  | 1.06995400  | 2.39118800  |
| H  | 4.65233900  | 1.71187800  | 1.40214400  |
| H  | 5.42956400  | 0.13043400  | 1.15249800  |
| O  | 5.41860900  | 1.31896600  | -0.48726600 |
| H  | -0.01399900 | -1.86428400 | 2.12343200  |
| H  | 2.98616400  | 1.34320200  | 2.97523500  |
| H  | 4.89245100  | 2.04026600  | -0.87100100 |
| O  | -2.19606900 | 0.07945300  | -0.71999700 |
| C  | -3.51817900 | 0.13143200  | -0.27577200 |
| C  | -4.30440100 | 1.25051700  | -0.53341800 |

|   |             |             |             |
|---|-------------|-------------|-------------|
| C | -4.02523400 | -0.98941400 | 0.36879700  |
| C | -5.63663300 | 1.23716300  | -0.12379800 |
| H | -3.88213800 | 2.11120400  | -1.04391400 |
| C | -5.36261700 | -0.99194100 | 0.76575200  |
| H | -3.37096500 | -1.84081500 | 0.54825200  |
| C | -6.16918400 | 0.12009500  | 0.52354700  |
| H | -6.26124500 | 2.10337800  | -0.31986400 |
| H | -5.76894200 | -1.86388600 | 1.26899800  |
| H | -7.20849000 | 0.11737200  | 0.83656500  |

### KI

at M06-2X/6-31+G\*&SDD (for I)/SMD(water)

Energy = -611.366752 A.U.

Thermal correction to Gibbs Free Energy =

-0.025597 A.U.

Sum of electronic and thermal Free Energies =

-611.392349 A.U.

at M06-2X/6-311+G\*&SDD (for I)/SMD(water)

Energy = -611.410443256 A.U.

|   |            |            |             |
|---|------------|------------|-------------|
| I | 0.00000000 | 0.00000000 | 0.88066000  |
| K | 0.00000000 | 0.00000000 | -2.45657800 |

### KI•H<sub>2</sub>O

at M06-2X/6-31+G\*&SDD (for I)/SMD(water)

Energy = -687.778039 A.U.

Thermal correction to Gibbs Free Energy =

-0.009155 A.U.

Sum of electronic and thermal Free Energies =

-687.787194 A.U.

at M06-2X/6-311+G\*& SDD (for I)/SMD(water)

Energy = -687.847549640 A.U.

|   |             |             |             |
|---|-------------|-------------|-------------|
| I | -1.51604400 | 0.03773300  | 0.00032500  |
| K | 1.85113200  | -0.24021500 | -0.00046300 |
| O | 4.40227400  | 0.23635100  | -0.01773200 |
| H | 5.11042600  | -0.42072500 | 0.07605300  |
| H | 4.85022600  | 1.09414600  | 0.05736200  |

**KI•2H<sub>2</sub>O**

at M06-2X/6-31+G\*&amp;SDD (for I)/SMD(water)

Energy = -764.1874339999999 A.U.

Thermal correction to Gibbs Free Energy =

0.00577 A.U.

Sum of electronic and thermal Free Energies =

-764.181664 A.U.

at M06-2X/6-311+G\*&amp;SDD SDD (for I)/SMD(water)

Energy = -764.282533028 A.U.

|   |             |             |             |
|---|-------------|-------------|-------------|
| I | 1.77954200  | 0.00884300  | 0.00547400  |
| K | -1.63192600 | 0.00489900  | -0.03767500 |
| O | -3.04633500 | -2.20272200 | -0.02130500 |
| H | -4.01343800 | -2.26390800 | -0.07234900 |
| H | -2.76417000 | -3.05614800 | 0.34444700  |
| O | -3.18256900 | 2.12887500  | -0.00000600 |
| H | -2.96855300 | 2.96916800  | -0.43584900 |
| H | -3.73173900 | 2.37991300  | 0.75994900  |

**KOH**

at M06-2X/6-31+G\*/SMD(water)

Energy = -675.725548 A.U.

Thermal correction to Gibbs Free Energy =

-0.014186 A.U.

Sum of electronic and thermal Free Energies =

-675.739734 A.U.

at M06-2X/6-311+G\*/SMD(water)

Energy = -675.793621185 A.U.

|   |             |             |            |
|---|-------------|-------------|------------|
| K | 0.03225100  | -0.83433700 | 0.00000000 |
| O | 0.03225100  | 1.72235400  | 0.00000000 |
| H | -0.87077400 | 2.07357700  | 0.00000000 |

**KOH•H<sub>2</sub>O**

at M06-2X/6-31+G\*/SMD(water)

Energy = -752.1355560000001 A.U.

Thermal correction to Gibbs Free Energy =

0.003093 A.U.

Sum of electronic and thermal Free Energies =

-752.132463 A.U.

at M06-2X/6-311+G\*/SMD(water)

Energy = -752.228356213 A.U.

|   |             |             |             |
|---|-------------|-------------|-------------|
| K | -0.11051000 | -0.28395400 | -0.03707100 |
| O | -2.60486900 | 0.22641100  | 0.11434400  |
| H | -2.93565200 | 0.91295500  | -0.48335600 |
| O | 2.47737200  | 0.24453200  | -0.01051300 |
| H | 3.16551300  | -0.39680200 | 0.22682600  |
| H | 2.88979800  | 1.11142300  | 0.13023200  |

**KOH•2H<sub>2</sub>O**

at M06-2X/6-31+G\*/SMD(water)

Energy = -828.5436639999999 A.U.

Thermal correction to Gibbs Free Energy =

0.017851 A.U.

Sum of electronic and thermal Free Energies =

-828.525813 A.U.

at M06-2X/6-311+G\*/SMD(water)

Energy = -828.660928036 A.U.

|   |             |            |             |
|---|-------------|------------|-------------|
| K | -3.75092744 | 1.14525132 | -0.01023680 |
| O | -1.06092744 | 1.14525132 | -0.01023680 |
| H | -0.74047285 | 1.17683313 | 0.89414777  |
| O | -5.28652589 | 2.07709465 | 1.28071223  |
| H | -5.49620981 | 1.69992191 | 2.13825137  |
| H | -5.96841764 | 2.70519795 | 1.03149365  |
| O | -5.19203250 | 1.02738368 | -1.68268051 |
| H | -5.16582003 | 0.71756452 | -2.59093432 |
| H | -6.10415666 | 1.07829406 | -1.38765905 |

**KOPh**

at M06-2X/6-31+G\*/SMD(water)

Energy = -906.701068 A.U.

Thermal correction to Gibbs Free Energy =

0.05977 A.U.

Sum of electronic and thermal Free Energies =

-906.641298 A.U.  
 at M06-2X/6-311+G\*&SDD (for Cu & I)/SMD(water)  
 Energy = -906.814544911 A.U.

|   |             |             |             |
|---|-------------|-------------|-------------|
| C | 0.39275500  | 0.76606800  | 0.83516800  |
| C | 1.55728400  | 1.36425300  | 0.35298000  |
| C | 2.47336200  | 0.63863800  | -0.41041400 |
| C | 2.19900700  | -0.70735400 | -0.68175600 |
| C | 1.04015800  | -1.31468800 | -0.20999100 |
| C | 0.08952300  | -0.59837900 | 0.56931100  |
| H | -0.29388400 | 1.33879800  | 1.45917000  |
| H | 1.75037000  | 2.40983600  | 0.58280800  |
| H | 3.37886100  | 1.10647100  | -0.78451100 |
| H | 2.90008300  | -1.29145100 | -1.27413400 |
| H | 0.83750000  | -2.36056200 | -0.43142100 |
| O | -1.02955200 | -1.14676700 | 0.98429800  |
| K | -2.46574000 | 0.37262200  | -0.53463600 |

**KOPh•H<sub>2</sub>O**

at M06-2X/6-31+G\*/SMD(water)  
 Energy = -983.111765 A.U.  
 Thermal correction to Gibbs Free Energy =  
 0.076114 A.U.  
 Sum of electronic and thermal Free Energies =  
 -983.035651 A.U.  
 at M06-2X/6-311+G\*/SMD(water)  
 Energy = -983.250148834 A.U.

|   |             |             |             |
|---|-------------|-------------|-------------|
| K | -1.87035200 | -0.48361100 | 0.32426700  |
| O | 0.09222900  | -1.73716400 | -0.88819900 |
| O | -3.98114700 | 1.06428200  | 0.24724400  |
| H | -4.82849300 | 0.90112400  | 0.69085000  |
| H | -4.19053600 | 1.69465400  | -0.46006300 |
| C | 0.92715800  | -0.80085300 | -0.50293800 |
| C | 0.87937300  | 0.51170400  | -1.05117100 |
| C | 1.89215900  | -1.02014100 | 0.51985300  |
| C | 1.73393700  | 1.52129200  | -0.60915100 |
| H | 0.16701200  | 0.71101200  | -1.85144600 |

|   |            |             |             |
|---|------------|-------------|-------------|
| C | 2.74035900 | -0.00454900 | 0.95039000  |
| H | 1.95300500 | -2.01200600 | 0.96332900  |
| C | 2.67393800 | 1.27856200  | 0.39478000  |
| H | 1.66403300 | 2.50939800  | -1.05885700 |
| H | 3.46396200 | -0.21534100 | 1.73500200  |
| H | 3.33751500 | 2.06673000  | 0.73716700  |

**KOPh•2H<sub>2</sub>O**

at M06-2X/6-31+G\*/SMD(water)  
 Energy = -1059.524642 A.U.  
 Thermal correction to Gibbs Free Energy =  
 0.097222 A.U.  
 Sum of electronic and thermal Free Energies =  
 -1059.42742 A.U.  
 at M06-2X/6-311+G\*/SMD(water)  
 Energy = -1059.68803324 A.U.

|   |             |             |             |
|---|-------------|-------------|-------------|
| K | 1.74669100  | -0.04644100 | 0.34753700  |
| O | 0.10084800  | -2.09588200 | -0.20315300 |
| O | 0.21025200  | 2.08982400  | -0.11136800 |
| H | -0.73533400 | 1.85307200  | -0.14543000 |
| H | 0.24648000  | 2.87817100  | 0.45293100  |
| O | 4.31817100  | 0.27878700  | -0.20937200 |
| H | 4.89094900  | -0.46769700 | -0.44680700 |
| H | 4.58609900  | 0.99124000  | -0.81125900 |
| C | -0.87195500 | -1.22184200 | -0.12989900 |
| C | -1.38299600 | -0.77706700 | 1.12283600  |
| C | -1.42986000 | -0.61292300 | -1.28934000 |
| C | -2.35942700 | 0.21235000  | 1.20466600  |
| H | -0.98340600 | -1.22892500 | 2.02953600  |
| C | -2.40879100 | 0.37245300  | -1.19524900 |
| H | -1.06198600 | -0.92944600 | -2.26329300 |
| C | -2.88170300 | 0.80623600  | 0.04999300  |
| H | -2.71377300 | 0.52966100  | 2.18303900  |
| H | -2.80179500 | 0.81911000  | -2.10604700 |
| H | -3.64013700 | 1.58012700  | 0.11722500  |

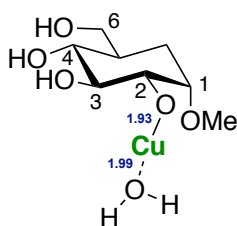

INT<sub>0-2</sub>

at M06-2X/6-31+G\*&SDD (for Cu & I)/SMD(water)

Energy = -999.480285 A.U.

Thermal correction to Gibbs Free Energy =

0.194706 A.U.

Sum of electronic and thermal Free Energies =

-999.285579 A.U.

at M06-2X/6-311+G\*&SDD (for Cu)/SMD(water)

Energy = -999.704285455 A.U.

|    |             |             |             |
|----|-------------|-------------|-------------|
| O  | -0.25978600 | 1.70670700  | 0.17423300  |
| Cu | -2.67863900 | -0.12768000 | 0.08285800  |
| H  | -0.02937000 | 3.71226900  | -0.31360800 |
| C  | 0.12933800  | 3.02805600  | 0.52913000  |
| H  | 1.18172700  | 3.06174200  | 0.83130700  |
| H  | -0.49918800 | 3.32909700  | 1.36848500  |
| C  | 0.33713400  | 1.25319300  | -1.00996400 |
| H  | 0.15941700  | 1.97417900  | -1.81798900 |
| O  | 1.75216000  | 1.19111200  | -0.88652800 |
| C  | -0.23010000 | -0.12633100 | -1.36553800 |
| C  | 2.21595000  | 0.29978600  | 0.12598300  |
| H  | 0.26331000  | -0.40411200 | -2.31515900 |
| C  | 0.23642400  | -1.13535700 | -0.31153800 |
| O  | -1.61194100 | -0.14355600 | -1.52547100 |
| H  | 1.81825700  | 0.60197700  | 1.10618700  |
| C  | 1.74742900  | -1.12150500 | -0.19267600 |
| C  | 3.73422700  | 0.43099100  | 0.14547500  |
| H  | -0.20114200 | -0.86525800 | 0.66424400  |
| O  | -0.19120800 | -2.44341300 | -0.66933300 |
| H  | 2.19350300  | -1.43723800 | -1.14724800 |
| O  | 2.20892900  | -1.97078200 | 0.85629600  |
| H  | 4.15162200  | 0.01755300  | -0.78284700 |
| H  | 3.99728300  | 1.49045300  | 0.20321300  |

|   |             |             |             |
|---|-------------|-------------|-------------|
| O | 4.30882400  | -0.19948300 | 1.28236600  |
| H | -1.12256800 | -2.34889800 | -0.94411100 |
| H | 2.03122600  | -2.89264500 | 0.60617000  |
| H | 3.95772800  | -1.10795700 | 1.31833600  |
| O | -3.84545400 | -0.13240000 | 1.69879100  |
| H | -3.44510300 | -0.70663300 | 2.37421300  |
| H | -4.69077600 | -0.56027100 | 1.47787800  |

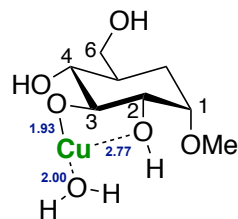

INT<sub>0-3</sub>

at M06-2X/6-31+G\*&SDD (for Cu)/SMD(water)

Energy = -999.4803099999999 A.U.

Thermal correction to Gibbs Free Energy =

0.195489 A.U.

Sum of electronic and thermal Free Energies =

-999.284821 A.U.

at M06-2X/6-311+G\*&SDD (for Cu)/SMD(water)

Energy = -999.704302671 A.U.

|    |             |             |             |
|----|-------------|-------------|-------------|
| O  | 1.29371600  | 1.96431900  | 0.68593500  |
| Cu | -3.06122800 | -0.36514600 | 0.04670500  |
| H  | 2.37284200  | 3.23963400  | 1.83676400  |
| C  | 2.47494800  | 2.73524100  | 0.87514800  |
| H  | 2.57597400  | 3.48013700  | 0.07622700  |
| H  | 3.36308700  | 2.09413500  | 0.89072800  |
| C  | 1.21157900  | 1.38512600  | -0.58964700 |
| H  | 1.32416700  | 2.15948700  | -1.35873500 |
| O  | 2.26729100  | 0.47606600  | -0.82376400 |
| C  | -0.14894300 | 0.68971400  | -0.69747000 |
| C  | 2.29470000  | -0.63841000 | 0.07671400  |
| H  | -0.28611600 | 0.37556300  | -1.73817500 |
| C  | -0.21686800 | -0.54628600 | 0.20742300  |
| O  | -1.18901700 | 1.61783800  | -0.42723000 |
| H  | 2.38506700  | -0.27375200 | 1.11009000  |

|   |             |             |             |
|---|-------------|-------------|-------------|
| C | 1.00206600  | -1.42357100 | -0.08865200 |
| C | 3.53091900  | -1.43523300 | -0.28605900 |
| H | -0.11742500 | -0.19546500 | 1.25470700  |
| O | -1.37487600 | -1.30718200 | 0.04295500  |
| H | 0.93442400  | -1.77558900 | -1.13130000 |
| O | 1.01513300  | -2.53807000 | 0.79331300  |
| H | 3.62034400  | -2.30172400 | 0.37225100  |
| H | 3.45034400  | -1.78425700 | -1.32440100 |
| O | 4.71233100  | -0.66203000 | -0.11135900 |
| H | -5.50702000 | -0.07288100 | -0.35010300 |
| H | 0.08355000  | -2.81683600 | 0.86804100  |
| H | 4.62705700  | 0.13356300  | -0.66353100 |
| O | -4.85295200 | 0.51288500  | 0.06816400  |
| H | -1.08943600 | 1.91548500  | 0.49404700  |
| H | -4.82466100 | 1.30163500  | -0.49990500 |

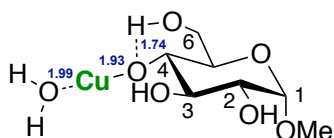

INT<sub>0-4</sub>

at M06-2X/6-31+G\*&SDD (for Cu)/SMD(water)

Energy = -999.481997 A.U.

Thermal correction to Gibbs Free Energy =

0.196681 A.U.

Sum of electronic and thermal Free Energies =

-999.285316 A.U.

at M06-2X/6-311+G\*&SDD (for Cu)/SMD(water)

Energy = -999.705544487 A.U.

|   |             |             |             |
|---|-------------|-------------|-------------|
| O | -3.06250300 | -0.65198400 | 0.85154800  |
| C | -2.66846200 | -0.57311400 | -0.49254000 |
| H | -3.50855700 | -0.83837900 | -1.14591100 |
| O | -2.30215000 | 0.73726600  | -0.86600900 |
| C | -1.18792600 | 1.25858100  | -0.13465400 |
| H | -1.42588900 | 1.27942800  | 0.93946200  |
| C | 0.06832900  | 0.39905900  | -0.35606100 |
| H | 0.26565400  | 0.38708800  | -1.44647300 |
| C | -1.49547800 | -1.53284100 | -0.67991900 |

|    |             |             |             |
|----|-------------|-------------|-------------|
| H  | -1.27118900 | -1.58511100 | -1.75022100 |
| C  | -0.25411300 | -1.03610900 | 0.05773000  |
| H  | -0.43644300 | -1.05881000 | 1.14353100  |
| C  | -0.98579900 | 2.68544100  | -0.62726900 |
| H  | -0.72133200 | 2.66343300  | -1.69475400 |
| H  | -1.91569200 | 3.25148500  | -0.51452100 |
| O  | 0.02534900  | 3.33943000  | 0.12817100  |
| O  | 1.14304600  | 0.95081500  | 0.35176400  |
| O  | 0.85700300  | -1.86994500 | -0.25289900 |
| O  | -1.84193400 | -2.85119600 | -0.28508000 |
| C  | -4.22111800 | 0.12108200  | 1.14471500  |
| H  | -4.00276200 | 1.19223900  | 1.08062600  |
| H  | -5.03249200 | -0.12957400 | 0.45062600  |
| H  | -4.51872300 | -0.12968300 | 2.16352200  |
| H  | 0.70368800  | 2.63568800  | 0.29456800  |
| H  | -2.13237900 | -2.81891100 | 0.64369100  |
| H  | 0.61320700  | -2.78356700 | -0.02660400 |
| Cu | 2.84105100  | 0.04427500  | 0.21261800  |
| O  | 4.63105900  | -0.83094300 | 0.18068100  |
| H  | 4.58888200  | -1.62300900 | -0.38193300 |
| H  | 5.27200000  | -0.24642800 | -0.25897200 |

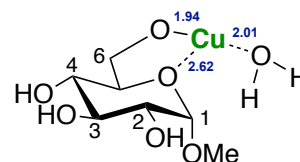

INT<sub>0-6</sub>

at M06-2X/6-31+G\*&SDD (for Cu)/SMD(water)

Energy = -999.4790200000001 A.U.

Thermal correction to Gibbs Free Energy =

0.198287 A.U.

Sum of electronic and thermal Free Energies =

-999.280733 A.U.

at M06-2X/6-311+G\*&SDD (for Cu)/SMD(water)

Energy = -999.702942425 A.U.

|    |             |             |            |
|----|-------------|-------------|------------|
| Cu | -2.27800900 | 0.88253300  | 0.56176600 |
| O  | 1.95555800  | -1.35331200 | 1.09231600 |

|   |             |             |             |
|---|-------------|-------------|-------------|
| C | 2.20564700  | -1.02285900 | -0.24754700 |
| H | 2.98956500  | -1.67399700 | -0.65358500 |
| O | 1.07728800  | -1.24177600 | -1.06652900 |
| C | -0.08056800 | -0.47048600 | -0.70502700 |
| H | -0.36162600 | -0.71077000 | 0.33372800  |
| C | 0.21326400  | 1.03948000  | -0.78692100 |
| H | 0.48164300  | 1.26725100  | -1.83773400 |
| C | 2.61906600  | 0.44445600  | -0.31593500 |
| H | 2.89748200  | 0.65586500  | -1.35711800 |
| C | 1.44536900  | 1.32384000  | 0.07487600  |
| H | 1.17983300  | 1.12839800  | 1.12554800  |
| C | -1.20229900 | -0.91570600 | -1.62886600 |
| H | -1.93062700 | -0.11007300 | -1.75142000 |
| H | -0.78749600 | -1.16432800 | -2.61308900 |
| O | -1.93943100 | -2.02425100 | -1.10573400 |
| O | -0.84811700 | 1.84469300  | -0.36437300 |
| H | -1.32284700 | -2.75308200 | -0.92197900 |
| O | 1.84123800  | 2.68364500  | -0.06374200 |
| H | 1.02293100  | 3.20684900  | 0.01420000  |
| O | 3.74104100  | 0.62979500  | 0.53380600  |
| H | 4.07532900  | 1.53140800  | 0.39521700  |
| O | -3.38108500 | -0.76294200 | 0.97334800  |
| H | -2.98870800 | -1.36494700 | 0.29831100  |
| H | -4.30583200 | -0.63551000 | 0.70400700  |
| C | 1.62074900  | -2.72461000 | 1.27281200  |
| H | 0.63598100  | -2.94877500 | 0.84764400  |
| H | 2.37555800  | -3.36766700 | 0.80375400  |
| H | 1.60178500  | -2.90561100 | 2.34821700  |

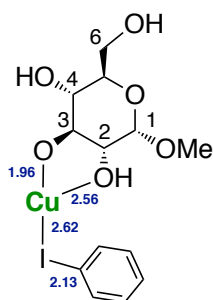

INT<sub>1-3</sub>

at M06-2X/6-31+G\*&SDD (for Cu & I)/SMD(water)

Energy = -1165.9916070000002 A.U.  
 Thermal correction to Gibbs Free Energy =  
 0.251602 A.U.  
 Sum of electronic and thermal Free Energies =  
 -1165.740005 A.U.  
 at M06-2X/6-31+G\*&SDD (for Cu & I)/SMD(water)  
 Energy = -1166.23919559 A.U.

|    |             |             |             |
|----|-------------|-------------|-------------|
| O  | 2.89196300  | 0.94777200  | 1.93310700  |
| H  | 3.86232400  | 1.46551100  | 3.63757200  |
| C  | 3.84824400  | 1.77133000  | 2.59077600  |
| H  | 3.55734500  | 2.82640400  | 2.51798800  |
| H  | 4.84542600  | 1.63713100  | 2.15735500  |
| C  | 2.64327100  | 1.33937300  | 0.60895600  |
| H  | 2.35465000  | 2.39753200  | 0.58026700  |
| O  | 3.79784100  | 1.24684600  | -0.19764700 |
| C  | 1.53569300  | 0.44482800  | 0.05634700  |
| C  | 4.33457800  | -0.07784700 | -0.29339500 |
| H  | 1.23605300  | 0.84525200  | -0.91956000 |
| C  | 1.99298800  | -1.01185600 | -0.13197400 |
| O  | 0.38120000  | 0.52990600  | 0.88196000  |
| H  | 4.58713000  | -0.44334200 | 0.71261500  |
| C  | 3.30254400  | -1.01273300 | -0.92798200 |
| C  | 5.60484300  | 0.05900800  | -1.10976700 |
| H  | 2.23527100  | -1.41144900 | 0.87466600  |
| O  | 1.02244800  | -1.78961600 | -0.76146800 |
| H  | 3.09044800  | -0.67707100 | -1.95431000 |
| O  | 3.79299000  | -2.35004800 | -0.94543900 |
| H  | 6.08580300  | -0.91505700 | -1.22522700 |
| H  | 5.35928200  | 0.45440700  | -2.10487400 |
| O  | 6.54671600  | 0.90227300  | -0.45804700 |
| H  | 4.37981000  | -2.46411900 | -1.70909400 |
| H  | 6.11464700  | 1.75950700  | -0.30436400 |
| H  | 0.61673500  | 0.18203900  | 1.76022500  |
| Cu | -0.81005300 | -1.48826900 | -0.13620500 |
| C  | -3.30704900 | 0.88633500  | -0.28765400 |
| I  | -3.34238000 | -1.11816200 | 0.44084900  |
| C  | -4.31905800 | 1.76004200  | 0.09731700  |

|   |             |            |             |
|---|-------------|------------|-------------|
| C | -2.27681400 | 1.28453100 | -1.13525300 |
| C | -4.29121000 | 3.07188100 | -0.38083700 |
| H | -5.11612900 | 1.43242400 | 0.75685900  |
| C | -2.26174200 | 2.60030200 | -1.60147800 |
| H | -1.49548600 | 0.58649100 | -1.42659000 |
| C | -3.26554800 | 3.49348300 | -1.22658500 |
| H | -5.07665100 | 3.76122900 | -0.08581200 |
| H | -1.46022700 | 2.92105900 | -2.26042000 |
| H | -3.24847700 | 4.51527300 | -1.59290100 |

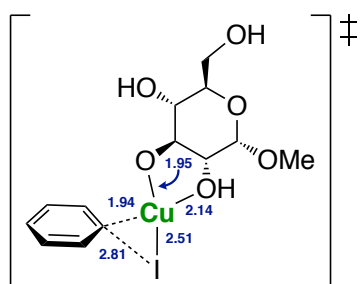

TS<sub>OA-3</sub>

at M06-2X/6-31+G\*&SDD (for Cu & I)/SMD(water)

Energy = -1165.960694 A.U.

Thermal correction to Gibbs Free Energy =

0.255587 A.U.

Sum of electronic and thermal Free Energies =

-1165.705107 A.U.

at M06-2X/6-311+G\*&SDD (for Cu)/SMD(water)

Energy = -1166.20819504 A.U.

|   |             |             |             |
|---|-------------|-------------|-------------|
| O | -3.02259000 | -1.81390600 | 0.82816400  |
| H | -4.00040900 | -2.97327500 | 2.17615200  |
| C | -4.18059500 | -2.56416700 | 1.18154900  |
| H | -4.33595800 | -3.38173500 | 0.46748600  |
| H | -5.06790500 | -1.92250500 | 1.20374600  |
| C | -3.05070600 | -1.34912800 | -0.49295900 |
| H | -3.24115200 | -2.18105600 | -1.18140000 |
| O | -4.09474400 | -0.42758200 | -0.72247200 |
| C | -1.71876900 | -0.66977800 | -0.77427300 |
| C | -4.02144400 | 0.76921500  | 0.06420800  |
| H | -1.66317600 | -0.44897000 | -1.84478500 |
| C | -1.53170100 | 0.62689400  | 0.01248800  |

|    |             |             |             |
|----|-------------|-------------|-------------|
| O  | -0.61341800 | -1.53776000 | -0.49859400 |
| H  | -4.03156900 | 0.50443500  | 1.13147200  |
| C  | -2.72927800 | 1.53670600  | -0.24839800 |
| C  | -5.27789400 | 1.54772200  | -0.27101600 |
| H  | -1.55493400 | 0.37489200  | 1.09084900  |
| O  | -0.30777600 | 1.21120900  | -0.33453900 |
| H  | -2.72890700 | 1.84879100  | -1.30286800 |
| O  | -2.60757200 | 2.67000600  | 0.60116500  |
| H  | -5.29697500 | 2.48616100  | 0.28772200  |
| H  | -5.29253600 | 1.77339200  | -1.34586800 |
| O  | -6.44546600 | 0.82751900  | 0.10330800  |
| H  | -3.10828600 | 3.40954300  | 0.22268600  |
| H  | -6.42218300 | -0.02983500 | -0.35430400 |
| H  | -0.73674500 | -1.91541300 | 0.39336200  |
| Cu | 1.04405300  | -0.19937300 | -0.28628800 |
| C  | 2.51045800  | 1.03196100  | 0.03576800  |
| I  | 2.99909700  | -1.73166300 | 0.04645300  |
| C  | 2.61198600  | 1.54879800  | 1.31753000  |
| C  | 3.02690600  | 1.64783300  | -1.09206900 |
| C  | 3.25937300  | 2.77938200  | 1.46573000  |
| H  | 2.20246900  | 1.02663200  | 2.17615300  |
| C  | 3.66905200  | 2.87944200  | -0.91626900 |
| H  | 2.93834300  | 1.20070000  | -2.07693800 |
| C  | 3.78636100  | 3.44094700  | 0.35504300  |
| H  | 3.34940700  | 3.21361500  | 2.45730000  |
| H  | 4.07941600  | 3.39021000  | -1.78263900 |
| H  | 4.29150500  | 4.39351700  | 0.48198900  |

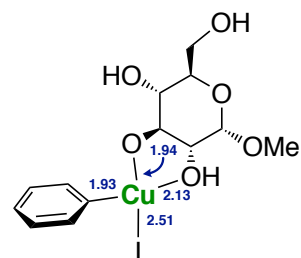

INT<sub>2-3</sub>

at M06-2X/6-31+G\*&SDD (for Cu & I)/SMD(water)

Energy = -1165.96074 A.U.

Thermal correction to Gibbs Free Energy =

0.254389 A.U.

Sum of electronic and thermal Free Energies =

-1165.706351 A.U.

at M06-2X/6-311+G\*&SDD (for Cu & I)/SMD(water)

Energy = -1166.20795173 A.U.

|    |             |             |             |
|----|-------------|-------------|-------------|
| O  | -2.99501600 | -1.79718100 | 0.86546400  |
| H  | -3.96268700 | -2.92042700 | 2.25065500  |
| C  | -4.15165000 | -2.53532500 | 1.24814700  |
| H  | -4.31651400 | -3.36947400 | 0.55582700  |
| H  | -5.03675300 | -1.89042800 | 1.26355500  |
| C  | -3.03518700 | -1.36220700 | -0.46523300 |
| H  | -3.23029000 | -2.20885600 | -1.13405900 |
| O  | -4.08130500 | -0.44590200 | -0.70685700 |
| C  | -1.70814000 | -0.68475900 | -0.77173100 |
| C  | -4.00676100 | 0.76687800  | 0.05467100  |
| H  | -1.66507500 | -0.47758100 | -1.84536000 |
| C  | -1.51899600 | 0.62020900  | -0.00154000 |
| O  | -0.59295200 | -1.54170000 | -0.49673300 |
| H  | -4.01742200 | 0.52459900  | 1.12723300  |
| C  | -2.71440800 | 1.52923800  | -0.27180100 |
| C  | -5.26146900 | 1.54064100  | -0.29813000 |
| H  | -1.53590200 | 0.38390300  | 1.07975500  |
| O  | -0.29596300 | 1.20091100  | -0.36283000 |
| H  | -2.71562600 | 1.82693300  | -1.33029700 |
| O  | -2.58952900 | 2.67272200  | 0.56281700  |
| H  | -5.27751900 | 2.49173400  | 0.23888100  |
| H  | -5.27513700 | 1.74177000  | -1.37784300 |
| O  | -6.43105800 | 0.83275900  | 0.09236200  |
| H  | -3.08241700 | 3.41090200  | 0.17166900  |
| H  | -6.41353600 | -0.03266900 | -0.34996800 |
| H  | -0.70648800 | -1.91655800 | 0.39795500  |
| Cu | 1.04629700  | -0.19591000 | -0.29656900 |
| C  | 2.43754700  | 1.09950400  | 0.03832400  |
| I  | 2.98436000  | -1.75771500 | 0.03230100  |
| C  | 2.55602300  | 1.58719500  | 1.32858100  |
| C  | 2.97512500  | 1.71364400  | -1.07905900 |
| C  | 3.25361700  | 2.78780200  | 1.49876000  |

|   |            |            |             |
|---|------------|------------|-------------|
| H | 2.12442000 | 1.06708600 | 2.17768400  |
| C | 3.66785100 | 2.91453200 | -0.88136400 |
| H | 2.86759800 | 1.28872300 | -2.07197700 |
| C | 3.80748500 | 3.44722300 | 0.40000900  |
| H | 3.36076400 | 3.20020500 | 2.49793400  |
| H | 4.09910800 | 3.42361400 | -1.73855500 |
| H | 4.35015900 | 4.37647900 | 0.54385400  |

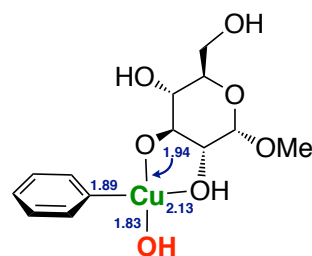

INT<sub>3-3</sub>

at M06-2X/6-31+G\*&SDD (for Cu)/SMD(water)

Energy = -1230.342511 A.U.

Thermal correction to Gibbs Free Energy =

0.269814 A.U.

Sum of electronic and thermal Free Energies =

-1230.072697 A.U.

at M06-2X/6-311+G\*&SDD (for Cu)/SMD(water)

Energy = -1230.61328015

|   |             |             |             |
|---|-------------|-------------|-------------|
| O | -2.77327000 | -1.67109000 | 0.85620000  |
| H | -4.04449000 | -2.53653600 | 2.17944300  |
| C | -4.09175500 | -2.10320800 | 1.17998600  |
| H | -4.43102900 | -2.86012800 | 0.46301100  |
| H | -4.78865300 | -1.25829500 | 1.17916200  |
| C | -2.64980000 | -1.22422500 | -0.46483800 |
| H | -3.00335700 | -1.99381300 | -1.16120400 |
| O | -3.44072500 | -0.08545700 | -0.73102200 |
| C | -1.19139000 | -0.86371000 | -0.70080700 |
| C | -3.12786200 | 1.06602800  | 0.06441800  |
| H | -1.06145600 | -0.63081900 | -1.76195700 |
| C | -0.74663300 | 0.33296100  | 0.13516100  |
| O | -0.30437200 | -1.95708200 | -0.43617700 |
| H | -3.26510700 | 0.82318500  | 1.12795400  |



|    |             |             |             |
|----|-------------|-------------|-------------|
| C  | -1.67414300 | 1.50581300  | -0.16437800 |
| C  | -4.13460900 | 2.12195000  | -0.34651800 |
| H  | -0.86942800 | 0.07791900  | 1.20333900  |
| O  | 0.59470000  | 0.63386300  | -0.15211600 |
| H  | -1.54083300 | 1.81190900  | -1.21202900 |
| O  | -1.33399900 | 2.57367500  | 0.70801400  |
| H  | -3.96084900 | 3.04336000  | 0.21394300  |
| H  | -4.02425500 | 2.33229600  | -1.41898400 |
| O  | -5.46320400 | 1.71031300  | -0.05317500 |
| H  | -1.62444200 | 3.41143100  | 0.31390400  |
| H  | -5.62005700 | 0.87008400  | -0.51621700 |
| H  | -0.51297100 | -2.31971200 | 0.44659300  |
| Cu | 1.57193800  | -0.96990200 | -0.19815800 |
| C  | 3.14751000  | 0.04617200  | 0.02326200  |
| C  | 3.63557400  | 0.22860500  | 1.30505800  |
| C  | 3.71422000  | 0.59642300  | -1.11268300 |
| C  | 4.77441800  | 1.02948700  | 1.45077200  |
| H  | 3.15918400  | -0.22657500 | 2.16783700  |
| C  | 4.85399300  | 1.39116600  | -0.94165500 |
| H  | 3.29719600  | 0.42304800  | -2.10002600 |
| C  | 5.37900600  | 1.60651700  | 0.33313700  |
| H  | 5.18277600  | 1.19709600  | 2.44326300  |
| H  | 5.32549300  | 1.83832700  | -1.81203300 |
| H  | 6.26294800  | 2.22486700  | 0.45592900  |
| O  | 2.60262700  | -2.48039900 | -0.29591200 |
| H  | 3.54790600  | -2.29492900 | -0.19734200 |

0.270857 A.U.

Sum of electronic and thermal Free Energies =  
-1230.063878 A.U.

at M06-2X/6-311+G\*&SDD (for Cu)/SMD(water)  
Energy = -1230.60582078

|    |             |             |             |
|----|-------------|-------------|-------------|
| O  | -2.80075700 | -1.66788800 | 0.90637400  |
| H  | -4.05041100 | -2.52873500 | 2.25289900  |
| C  | -4.10912800 | -2.11697600 | 1.24483000  |
| H  | -4.43750200 | -2.89509700 | 0.54542300  |
| H  | -4.82242900 | -1.28585900 | 1.22957200  |
| C  | -2.68889100 | -1.25138400 | -0.42688100 |
| H  | -3.03340000 | -2.04583700 | -1.10002800 |
| O  | -3.50574800 | -0.13686000 | -0.71519100 |
| C  | -1.23381800 | -0.88261600 | -0.68011700 |
| C  | -3.20573500 | 1.03707600  | 0.05134000  |
| H  | -1.11347500 | -0.68510000 | -1.75026500 |
| C  | -0.79769600 | 0.35594500  | 0.10573100  |
| O  | -0.35423000 | -1.96819600 | -0.38678100 |
| H  | -3.32362300 | 0.81366600  | 1.12158700  |
| C  | -1.76481300 | 1.49478000  | -0.20963300 |
| C  | -4.24147000 | 2.06258000  | -0.36506600 |
| H  | -0.90675300 | 0.12989600  | 1.18414600  |
| O  | 0.52817500  | 0.67883900  | -0.20275800 |
| H  | -1.65408000 | 1.77824500  | -1.26677300 |
| O  | -1.43320800 | 2.59362000  | 0.62983500  |
| H  | -4.08322200 | 2.99795400  | 0.17653600  |
| H  | -4.15059200 | 2.25607900  | -1.44253500 |
| O  | -5.55663300 | 1.62609200  | -0.04632500 |
| H  | -1.77680900 | 3.41113800  | 0.23641600  |
| H  | -5.69695100 | 0.77050700  | -0.48593600 |
| H  | -0.52359700 | -2.25735100 | 0.52951800  |
| Cu | 1.60498000  | -0.90775400 | -0.25586800 |
| C  | 3.34676500  | -0.14978600 | 0.00500600  |
| C  | 3.71989200  | 0.08835900  | 1.31734700  |
| C  | 3.92352300  | 0.46143400  | -1.09511000 |
| C  | 4.73033200  | 1.02951600  | 1.53271800  |
| H  | 3.24717200  | -0.43102600 | 2.14473500  |

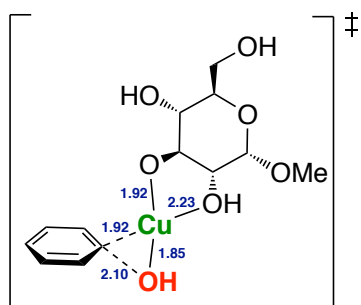

TS<sub>RE-3</sub>

at M06-2X/6-31+G\*&SDD (for Cu)/SMD(water)

Energy = -1230.334735 A.U.

Thermal correction to Gibbs Free Energy =

|   |            |             |             |
|---|------------|-------------|-------------|
| C | 4.93737500 | 1.39447100  | -0.84919400 |
| H | 3.60175700 | 0.23392100  | -2.10662900 |
| C | 5.33913500 | 1.67845500  | 0.45599800  |
| H | 5.04046800 | 1.24793600  | 2.55050700  |
| H | 5.40705500 | 1.89670500  | -1.69002300 |
| H | 6.12762900 | 2.40265700  | 0.63492000  |
| O | 2.94441500 | -2.18468000 | -0.27120400 |
| H | 3.29540800 | -2.22336300 | -1.17731900 |

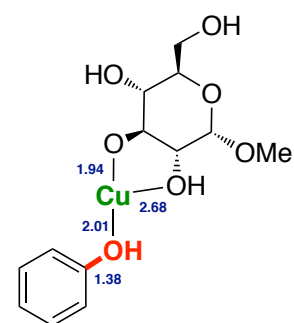

INT<sub>4-3</sub>

at M06-2X/6-31+G\*&SDD (for Cu)/SMD(water)

Energy = -1230.426137 A.U.

Thermal correction to Gibbs Free Energy =

0.271078 A.U.

Sum of electronic and thermal Free Energies =

-1230.155059 A.U.

at M06-2X/6-311+G\*&SDD (for Cu)/SMD(water)

Energy = -1230.69719468

|   |             |             |             |
|---|-------------|-------------|-------------|
| O | -2.71767000 | -1.82612400 | 0.99423300  |
| H | -3.55170700 | -2.88349900 | 2.51149100  |
| C | -3.84097300 | -2.52077800 | 1.52439200  |
| H | -4.10289100 | -3.36950900 | 0.88089300  |
| H | -4.70511100 | -1.85399900 | 1.61873900  |
| C | -2.88933600 | -1.43925500 | -0.34381600 |
| H | -3.15343200 | -2.31233700 | -0.95365500 |
| O | -3.96273400 | -0.53689200 | -0.50130000 |
| C | -1.58311800 | -0.80448600 | -0.81661000 |
| C | -3.80350000 | 0.68653800  | 0.22594200  |
| H | -1.66335400 | -0.63822200 | -1.89666100 |
| C | -1.30782400 | 0.54642400  | -0.13504600 |

|    |             |             |             |
|----|-------------|-------------|-------------|
| O  | -0.50890700 | -1.71854400 | -0.64032500 |
| H  | -3.69550500 | 0.46383500  | 1.29747400  |
| C  | -2.55646600 | 1.42562600  | -0.26532100 |
| C  | -5.08731900 | 1.46096400  | 0.00397800  |
| H  | -1.17285100 | 0.34752400  | 0.94792000  |
| O  | -0.19214300 | 1.18684900  | -0.67472200 |
| H  | -2.68687400 | 1.69737500  | -1.32358300 |
| O  | -2.33998600 | 2.59741900  | 0.51517700  |
| H  | -5.04502600 | 2.41630300  | 0.53194400  |
| H  | -5.21720400 | 1.65403700  | -1.06966700 |
| O  | -6.21071700 | 0.75958500  | 0.52269300  |
| H  | -2.89245000 | 3.31703800  | 0.17210000  |
| H  | -6.23702200 | -0.11166100 | 0.09244200  |
| H  | -0.43984400 | -1.91514400 | 0.31063100  |
| Cu | 1.43070100  | 0.12687900  | -0.67995500 |
| C  | 4.37039200  | -0.33923100 | -0.11749200 |
| C  | 4.33274400  | 0.92709600  | 0.45877600  |
| C  | 5.53200800  | -1.10598400 | -0.11215500 |
| C  | 5.48755400  | 1.43537500  | 1.05016900  |
| H  | 3.40326700  | 1.49227000  | 0.43414500  |
| C  | 6.67971800  | -0.58436900 | 0.48495000  |
| H  | 5.53436200  | -2.09256200 | -0.56800200 |
| C  | 6.66445300  | 0.68403500  | 1.06638600  |
| H  | 5.46431500  | 2.42339500  | 1.50000300  |
| H  | 7.58905900  | -1.17786600 | 0.49247200  |
| H  | 7.56148700  | 1.08398400  | 1.52830500  |
| O  | 3.20931400  | -0.80550700 | -0.70088900 |
| H  | 3.31321000  | -1.70647600 | -1.05214000 |

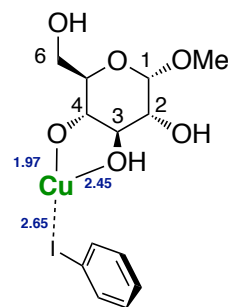

INT<sub>1-4</sub>

at M06-2X/6-31+G\*&SDD (for Cu & I)/SMD(water)

Energy = -1165.991789 A.U.

Thermal correction to Gibbs Free Energy =  
0.251711 A.U.

Sum of electronic and thermal Free Energies =  
-1165.740078 A.U.

at M06-2X/6-311+G\*&SDD (for Cu & I)/SMD(water)

Energy = -1166.23938465 A.U.

|    |             |             |             |
|----|-------------|-------------|-------------|
| O  | -4.45693100 | 0.90984200  | -1.52205800 |
| C  | -4.05481200 | 1.46629600  | -0.29677200 |
| H  | -4.66836500 | 2.34646000  | -0.06805200 |
| O  | -4.24864600 | 0.58167700  | 0.78157400  |
| C  | -3.51196300 | -0.64573100 | 0.68068900  |
| H  | -3.80594300 | -1.17063600 | -0.24216100 |
| C  | -1.99765200 | -0.38096900 | 0.64274100  |
| H  | -1.73777500 | 0.15791400  | 1.57817100  |
| C  | -2.57945800 | 1.83672900  | -0.42755500 |
| H  | -2.29325800 | 2.40251500  | 0.46481600  |
| C  | -1.71645500 | 0.58296700  | -0.51587000 |
| H  | -1.92288700 | 0.05771200  | -1.46069200 |
| C  | -3.91354200 | -1.48453200 | 1.87614500  |
| H  | -3.30892200 | -2.39622800 | 1.89843800  |
| H  | -3.73596800 | -0.92045600 | 2.79734000  |
| O  | -5.30212300 | -1.80494400 | 1.86635300  |
| O  | -1.28727300 | -1.57430700 | 0.52040700  |
| O  | -0.33451700 | 0.93554200  | -0.46743500 |
| O  | -2.36759600 | 2.70270900  | -1.53217900 |
| C  | -5.84323900 | 0.59035200  | -1.56281100 |
| H  | -6.07100900 | -0.24901000 | -0.89673200 |
| H  | -6.44389300 | 1.46089400  | -1.27213200 |
| H  | -6.07370900 | 0.31205100  | -2.59189500 |
| H  | -5.47573900 | -2.37194600 | 1.09700200  |
| H  | -2.71448400 | 2.25953300  | -2.32675900 |
| H  | -0.09547200 | 1.37027400  | -1.30230700 |
| Cu | 0.59234300  | -1.28453900 | 0.00311100  |
| C  | 3.45386400  | 0.59271800  | 0.28990700  |
| I  | 3.15633500  | -1.28086800 | -0.68385500 |
| C  | 4.47867200  | 1.42944800  | -0.14119200 |

|   |            |            |             |
|---|------------|------------|-------------|
| C | 2.61315300 | 0.94340800 | 1.34320300  |
| C | 4.66006100 | 2.65445700 | 0.50497300  |
| H | 5.12516700 | 1.14083500 | -0.96363600 |
| C | 2.80636300 | 2.17232700 | 1.97628200  |
| H | 1.81842700 | 0.27357900 | 1.66248900  |
| C | 3.82718100 | 3.02705200 | 1.55978400  |
| H | 5.45640300 | 3.31556700 | 0.17627900  |
| H | 2.15433200 | 2.45585400 | 2.79712000  |
| H | 3.97306200 | 3.98142500 | 2.05637400  |

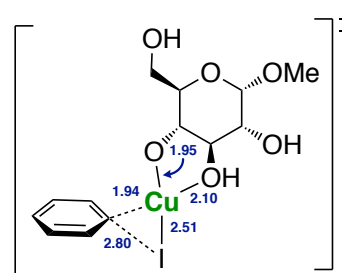

TS<sub>0A-4</sub>

at M06-2X/6-31+G\*&SDD (for Cu & I)/SMD(water)

Energy = -1165.962566 A.U.

Thermal correction to Gibbs Free Energy =  
0.255847 A.U.

Sum of electronic and thermal Free Energies =  
-1165.706719 A.U.

at M06-2X/6-311+G\*&SDD (for Cu & I)/SMD(water)

Energy = -1166.21023019 A.U.

|   |             |             |             |
|---|-------------|-------------|-------------|
| O | -4.38708000 | -0.77278700 | 1.20776500  |
| C | -4.21299700 | -0.87646600 | -0.18079400 |
| H | -5.10958400 | -1.30871700 | -0.64120900 |
| O | -4.04800800 | 0.38342000  | -0.79088200 |
| C | -2.91249100 | 1.12883600  | -0.32824200 |
| H | -2.99398400 | 1.28490000  | 0.75854900  |
| C | -1.62971900 | 0.34929400  | -0.63786300 |
| H | -1.60458000 | 0.18855100  | -1.73369200 |
| C | -2.98837600 | -1.76677400 | -0.41673700 |
| H | -2.92531800 | -1.98423600 | -1.48728200 |
| C | -1.73747500 | -1.02282000 | 0.02028600  |
| H | -1.73470600 | -0.89734400 | 1.11165500  |

|    |             |             |             |
|----|-------------|-------------|-------------|
| C  | -2.95250200 | 2.46878000  | -1.03254600 |
| H  | -2.04514300 | 3.03106200  | -0.78878900 |
| H  | -2.99053200 | 2.31298800  | -2.11523000 |
| O  | -4.11558800 | 3.21678400  | -0.69383200 |
| O  | -0.48086700 | 1.00979100  | -0.19221100 |
| O  | -0.54258700 | -1.72491400 | -0.36339000 |
| O  | -3.12739200 | -3.01507800 | 0.23949600  |
| C  | -5.55165000 | -0.03906700 | 1.57249900  |
| H  | -5.44086500 | 1.02092900  | 1.31953300  |
| H  | -6.43333600 | -0.44622700 | 1.06311500  |
| H  | -5.66766900 | -0.14643600 | 2.65154400  |
| H  | -4.06233300 | 3.45289200  | 0.24687700  |
| H  | -3.30051100 | -2.84100500 | 1.18193400  |
| H  | -0.39994800 | -2.48375100 | 0.22845000  |
| Cu | 0.97398200  | -0.28844100 | -0.15534500 |
| C  | 2.30520900  | 1.08233200  | 0.18143400  |
| I  | 3.12212800  | -1.58830200 | -0.07894400 |
| C  | 2.37203700  | 1.51495900  | 1.49575100  |
| C  | 2.74115100  | 1.82636400  | -0.90292900 |
| C  | 2.89552000  | 2.79214400  | 1.72749300  |
| H  | 2.03248700  | 0.89388000  | 2.31853200  |
| C  | 3.26077600  | 3.09893100  | -0.64428300 |
| H  | 2.68359900  | 1.44212900  | -1.91616600 |
| C  | 3.33916400  | 3.57887900  | 0.66399700  |
| H  | 2.95681800  | 3.16189700  | 2.74699900  |
| H  | 3.60715200  | 3.70785600  | -1.47446000 |
| H  | 3.75049100  | 4.56534500  | 0.85470000  |

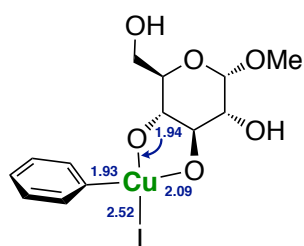

INT<sub>2-4</sub>

at M06-2X/6-31+G\*&SDD (for Cu & I)/SMD(water)

Energy = -1165.9625839999999 A.U.

Thermal correction to Gibbs Free Energy =

0.254485 A.U.

Sum of electronic and thermal Free Energies =

-1165.708099 A.U.

at M06-2X/6-311+G\*&SDD (for Cu & I)/SMD(water)

Energy = -1166.21000127 A.U.

|    |             |             |             |
|----|-------------|-------------|-------------|
| O  | -4.39846600 | -0.77829400 | 1.17974700  |
| C  | -4.20593600 | -0.86306100 | -0.20751800 |
| H  | -5.09735600 | -1.28562000 | -0.68650500 |
| O  | -4.02882200 | 0.40505900  | -0.79720300 |
| C  | -2.89830600 | 1.14033800  | -0.30814900 |
| H  | -2.99424200 | 1.28171600  | 0.77936400  |
| C  | -1.61585100 | 0.35837400  | -0.61111400 |
| H  | -1.57465900 | 0.21306200  | -1.70810700 |
| C  | -2.98092900 | -1.75501400 | -0.43887400 |
| H  | -2.90264800 | -1.95666800 | -1.51147700 |
| C  | -1.73515500 | -1.02071200 | 0.02794800  |
| H  | -1.74737900 | -0.91085300 | 1.12071300  |
| C  | -2.92215500 | 2.49009500  | -0.99425800 |
| H  | -2.01425200 | 3.04335300  | -0.73246100 |
| H  | -2.94877500 | 2.34947700  | -2.07931800 |
| O  | -4.08446100 | 3.23982700  | -0.65765100 |
| O  | -0.47122700 | 1.01053500  | -0.13997500 |
| O  | -0.53310600 | -1.71586500 | -0.34944600 |
| O  | -3.13440500 | -3.01197600 | 0.19666300  |
| C  | -5.56412700 | -0.04343400 | 1.53917900  |
| H  | -5.44378500 | 1.01954100  | 1.30376500  |
| H  | -6.44082300 | -0.43771100 | 1.01143100  |
| H  | -5.69582000 | -0.16631500 | 2.61474900  |
| H  | -4.03722600 | 3.46731800  | 0.28550400  |
| H  | -3.32246500 | -2.85146700 | 1.13866300  |
| H  | -0.39231900 | -2.47982700 | 0.23653200  |
| Cu | 0.97068700  | -0.28202800 | -0.13077800 |
| C  | 2.25195800  | 1.12849400  | 0.16967400  |
| I  | 3.09923400  | -1.62420600 | -0.07301500 |
| C  | 2.35834800  | 1.56635800  | 1.47872700  |
| C  | 2.70271700  | 1.84179400  | -0.92781200 |
| C  | 2.94769000  | 2.81803300  | 1.69220300  |

|   |            |            |             |
|---|------------|------------|-------------|
| H | 2.00203900 | 0.96843900 | 2.31165600  |
| C | 3.28798800 | 3.08973500 | -0.68762700 |
| H | 2.61019200 | 1.45354000 | -1.93700200 |
| C | 3.41154300 | 3.57434000 | 0.61535600  |
| H | 3.04395200 | 3.19143200 | 2.70769700  |
| H | 3.64987800 | 3.67513800 | -1.52804500 |
| H | 3.87357000 | 4.54085500 | 0.79167400  |

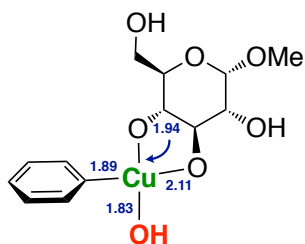

INT<sub>3-4</sub>

at M06-2X/6-31+G\*&SDD (for Cu)/SMD(water)

Energy = -1230.3441930000001 A.U.

Thermal correction to Gibbs Free Energy =

0.270087 A.U.

Sum of electronic and thermal Free Energies =

-1230.074106 A.U.

at M06-2X/6-311+G\*&SDD (for Cu & I)/SMD(water)

Energy = -1230.61516798 A.U.

|   |             |             |             |
|---|-------------|-------------|-------------|
| O | -3.86454400 | -0.19478700 | 1.10845600  |
| C | -3.66700300 | -0.23984700 | -0.27953700 |
| H | -4.62701100 | -0.36475600 | -0.79448000 |
| O | -3.12743600 | 0.96324400  | -0.78066200 |
| C | -1.84683000 | 1.31962200  | -0.24275400 |
| H | -1.91973000 | 1.40826400  | 0.85199900  |
| C | -0.83463200 | 0.22509100  | -0.59738600 |
| H | -0.81190700 | 0.13429400  | -1.69899400 |
| C | -2.73244700 | -1.42258200 | -0.55944100 |
| H | -2.67974600 | -1.57071500 | -1.64227500 |
| C | -1.34864600 | -1.08944200 | -0.02748900 |
| H | -1.36942800 | -1.02337800 | 1.06852400  |
| C | -1.47794500 | 2.66509100  | -0.83083500 |
| H | -0.45855800 | 2.92379500  | -0.52561000 |

|    |             |             |             |
|----|-------------|-------------|-------------|
| H  | -1.51682200 | 2.61328700  | -1.92319800 |
| O  | -2.39398900 | 3.68360900  | -0.44440000 |
| O  | 0.44096000  | 0.50706400  | -0.08381300 |
| O  | -0.37360300 | -2.07171800 | -0.40788700 |
| O  | -3.24545000 | -2.62362000 | -0.01278900 |
| C  | -4.80200100 | 0.79797500  | 1.51218800  |
| H  | -4.39958400 | 1.80381400  | 1.35079500  |
| H  | -5.73991500 | 0.68449400  | 0.95544300  |
| H  | -4.98486800 | 0.64455200  | 2.57632600  |
| H  | -2.32782800 | 3.80485300  | 0.51729800  |
| H  | -3.40494000 | -2.47708000 | 0.93650600  |
| H  | -0.46002200 | -2.86123100 | 0.15442500  |
| Cu | 1.45695100  | -1.07808600 | -0.09211000 |
| C  | 3.00936300  | -0.02669400 | 0.11836000  |
| C  | 3.29830300  | 0.43569300  | 1.39017400  |
| C  | 3.76033600  | 0.26816500  | -1.00611700 |
| C  | 4.42236000  | 1.25677000  | 1.53690000  |
| H  | 2.68108200  | 0.17680900  | 2.24511100  |
| C  | 4.87718400  | 1.09494300  | -0.83532000 |
| H  | 3.49927700  | -0.12171100 | -1.98510700 |
| C  | 5.20536100  | 1.58491500  | 0.42929000  |
| H  | 4.67883800  | 1.63623900  | 2.52181500  |
| H  | 5.48657500  | 1.34970200  | -1.69764000 |
| H  | 6.07495600  | 2.22325200  | 0.55235000  |
| O  | 2.49085600  | -2.58329700 | 0.04825000  |
| H  | 3.43329900  | -2.38212900 | 0.14246900  |

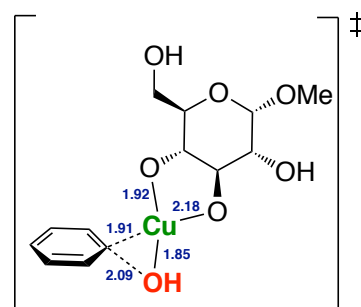

TS<sub>RE-4</sub>

at M06-2X/6-31+G\*&SDD (for Cu)/SMD(water)

Energy = -1230.335871 A.U.

Thermal correction to Gibbs Free Energy =

0.270204 A.U.

Sum of electronic and thermal Free Energies =

-1230.065667 A.U.

at M06-2X/6-311+G\*&SDD (for Cu)/SMD(water)

Energy = -1230.60717253 A.U.

|    |             |             |             |
|----|-------------|-------------|-------------|
| O  | -3.88018700 | -0.25680900 | 1.15349300  |
| C  | -3.71898900 | -0.28624300 | -0.24038400 |
| H  | -4.69086200 | -0.42772400 | -0.72861700 |
| O  | -3.21960100 | 0.93177300  | -0.74499100 |
| C  | -1.92957400 | 1.30579200  | -0.23964400 |
| H  | -1.97607900 | 1.38586300  | 0.85768400  |
| C  | -0.89503300 | 0.24167800  | -0.62642100 |
| H  | -0.90358100 | 0.16113100  | -1.73112900 |
| C  | -2.76666900 | -1.44315500 | -0.55638100 |
| H  | -2.74354500 | -1.58139200 | -1.64176200 |
| C  | -1.37112900 | -1.09451100 | -0.06308700 |
| H  | -1.36647300 | -1.03685900 | 1.03456800  |
| C  | -1.60613700 | 2.66436700  | -0.82415400 |
| H  | -0.58585500 | 2.94382800  | -0.54162900 |
| H  | -1.67063300 | 2.62133800  | -1.91584000 |
| O  | -2.53433300 | 3.66100300  | -0.40793100 |
| O  | 0.38233600  | 0.54960800  | -0.14752800 |
| O  | -0.40684400 | -2.07012400 | -0.47432500 |
| O  | -3.24022800 | -2.66071500 | -0.00721900 |
| C  | -4.82281100 | 0.71628900  | 1.59044600  |
| H  | -4.44020400 | 1.73026200  | 1.43140100  |
| H  | -5.77190000 | 0.59467200  | 1.05457300  |
| H  | -4.97849500 | 0.54829200  | 2.65677100  |
| H  | -2.45496400 | 3.76836200  | 0.55436300  |
| H  | -3.36975700 | -2.52702400 | 0.94852600  |
| H  | -0.50161200 | -2.86833500 | 0.07213500  |
| Cu | 1.48188700  | -1.02722200 | -0.13042800 |
| C  | 3.19583200  | -0.21343300 | 0.12824600  |
| C  | 3.50014900  | 0.16774200  | 1.42489200  |
| C  | 3.82247500  | 0.28849100  | -1.00000500 |
| C  | 4.49099200  | 1.13908500  | 1.59088500  |
| H  | 2.99302100  | -0.27232900 | 2.27770100  |

|   |            |             |             |
|---|------------|-------------|-------------|
| C | 4.81325600 | 1.25715700  | -0.80315600 |
| H | 3.55445500 | -0.04720600 | -1.99696000 |
| C | 5.14695300 | 1.68114900  | 0.48337800  |
| H | 4.74961200 | 1.46405600  | 2.59456800  |
| H | 5.31908100 | 1.67741400  | -1.66768100 |
| H | 5.91978100 | 2.43028600  | 0.62401000  |
| O | 2.84359700 | -2.26781900 | 0.06892200  |
| H | 3.22946600 | -2.41698300 | -0.81134900 |

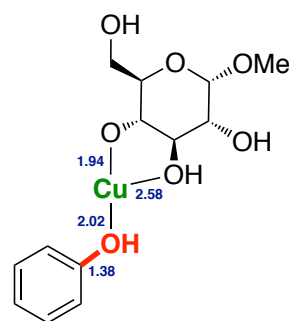

INT<sub>4-4</sub>

at M06-2X/6-31+G\*&SDD (for Cu)/SMD(water)

Energy = -1230.426389 A.U.

Thermal correction to Gibbs Free Energy =

0.269669 A.U.

Sum of electronic and thermal Free Energies =

-1230.15672 A.U.

at M06-2X/6-311+G\*&SDD (for Cu)/SMD(water)

Energy = -1230.69738294 A.U.

|   |             |             |             |
|---|-------------|-------------|-------------|
| O | -4.07490200 | -0.70969800 | 1.38748000  |
| C | -4.07134800 | -0.77730500 | -0.01508000 |
| H | -5.03617800 | -1.15720400 | -0.37343300 |
| O | -3.91943000 | 0.48977300  | -0.61098300 |
| C | -2.70303000 | 1.16361000  | -0.25756800 |
| H | -2.66824200 | 1.29811200  | 0.83503500  |
| C | -1.46794100 | 0.36002200  | -0.69865000 |
| H | -1.52263100 | 0.25486000  | -1.80213100 |
| C | -2.92444100 | -1.69553300 | -0.42738700 |
| H | -2.99804900 | -1.86033800 | -1.50708900 |
| C | -1.57733100 | -1.05221800 | -0.11467900 |
| H | -1.44922400 | -0.98425600 | 0.97694400  |

|    |             |             |             |                                                |
|----|-------------|-------------|-------------|------------------------------------------------|
| C  | -2.76015400 | 2.52250900  | -0.92454000 | 0.254733 A.U.                                  |
| H  | -1.81234700 | 3.04556200  | -0.76535300 | Sum of electronic and thermal Free Energies =  |
| H  | -2.91640700 | 2.39558900  | -2.00063400 | -1165.738015 A.U.                              |
| O  | -3.85230100 | 3.30821600  | -0.45471200 | at M06-2X/6-311+G*&SDD (for Cu & I)/SMD(water) |
| O  | -0.30123900 | 1.01168700  | -0.29887500 | Energy = -1166.24082370 A.U.                   |
| O  | -0.52327100 | -1.84011200 | -0.66381100 |                                                |
| O  | -3.04480600 | -2.97447200 | 0.17703000  | Cu 1.00329200 1.09342700 -0.21034100           |
| C  | -5.14701700 | 0.06826300  | 1.90788100  | C 2.81736200 0.19827200 1.45326000             |
| H  | -5.01052100 | 1.12958600  | 1.67316800  | C 2.82067900 -0.08774600 0.07802800            |
| H  | -6.10354500 | -0.27644100 | 1.49641600  | C 3.42542300 0.79305500 -0.83397300            |
| H  | -5.14158400 | -0.06946700 | 2.98980500  | C 4.05952500 1.94372200 -0.35353400            |
| H  | -3.70028700 | 3.51047000  | 0.48297800  | C 4.08121200 2.21966500 1.01217300             |
| H  | -3.06688400 | -2.84852900 | 1.14224100  | C 3.45084400 1.35617800 1.90960700             |
| H  | -0.53065800 | -2.70507300 | -0.22156400 | H 2.34946800 -0.48603300 2.15414200            |
| Cu | 1.31660400  | -0.06722800 | -0.30642400 | H 3.42978600 0.56412500 -1.89474100            |
| C  | 4.28622600  | -0.37936200 | 0.01263300  | H 4.53852300 2.61638200 -1.05829700            |
| C  | 4.20808200  | 0.73029600  | 0.84891500  | H 4.58150700 3.11071700 1.37810400             |
| C  | 5.50859900  | -0.85179300 | -0.45681800 | H 3.45508000 1.57201300 2.97362900             |
| C  | 5.38353700  | 1.37932700  | 1.22178400  | C -2.17503200 1.29463200 -0.19668400           |
| H  | 3.23158200  | 1.07059800  | 1.18701000  | O -1.45227300 0.06503300 -0.36386700           |
| C  | 6.67637500  | -0.18940600 | -0.07819500 | C -1.94020600 -1.01762000 0.39770500           |
| H  | 5.53978000  | -1.72091600 | -1.10887000 | C -3.37408900 -1.32679600 -0.01843200          |
| C  | 6.62069500  | 0.92417600  | 0.76070700  | H -3.34958800 -1.61497900 -1.07846300          |
| H  | 5.32938900  | 2.24654500  | 1.87302200  | C -3.62577100 1.08345800 -0.62934600           |
| H  | 7.63296900  | -0.55068000 | -0.44373800 | H -3.65123200 0.85882200 -1.70654300           |
| H  | 7.53327000  | 1.43501000  | 1.05114100  | C -4.24162600 -0.08650800 0.13317000           |
| O  | 3.10050500  | -1.00815100 | -0.32094600 | H -4.31637800 0.17995000 1.19555900            |
| H  | 3.23810700  | -1.69728700 | -0.99414600 | I 2.00903300 -1.92956400 -0.62866700           |

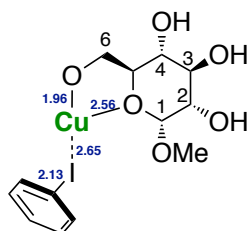

INT<sub>1-6</sub>

at M06-2X/6-31+G\*&SDD (for Cu & I)/SMD(water)

Energy = -1165.992748 A.U.

Thermal correction to Gibbs Free Energy =

|   |             |             |             |
|---|-------------|-------------|-------------|
| C | -1.44570600 | 2.34521600  | -1.02583000 |
| H | -1.42649000 | 1.97441900  | -2.06890800 |
| H | -2.07040300 | 3.25282000  | -1.02180400 |
| O | -0.16281700 | 2.62833400  | -0.54449200 |
| O | -3.85115300 | -2.40175800 | 0.77025700  |
| H | -4.75277600 | -2.60718100 | 0.47160400  |
| O | -5.53321100 | -0.41229300 | -0.37057300 |
| H | -6.19318100 | 0.15155400  | 0.06309300  |
| O | -4.33630300 | 2.28604200  | -0.36456000 |
| H | -5.23326900 | 2.20053400  | -0.72714000 |

|   |             |             |            |
|---|-------------|-------------|------------|
| H | -2.14917600 | 1.58872800  | 0.86332200 |
| O | -1.92569500 | -0.74836200 | 1.77338100 |
| C | -0.61421000 | -0.52696500 | 2.27983300 |
| H | -0.70020100 | -0.46782500 | 3.36599100 |
| H | 0.04584800  | -1.35924600 | 2.00525600 |
| H | -0.19821400 | 0.41359000  | 1.89572900 |
| H | -1.27230500 | -1.85821500 | 0.17170100 |

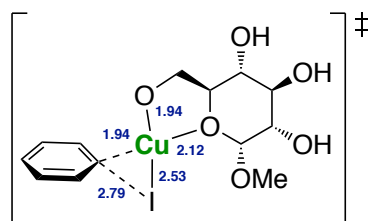

TS<sub>0A-6</sub>

at M06-2X/6-31+G\*&SDD (for Cu & I)/SMD(water)

Energy = -1165.9613080000001 A.U.

Thermal correction to Gibbs Free Energy =

0.257749 A.U.

Sum of electronic and thermal Free Energies =

-1165.703559 A.U.

at M06-2X/6-311+G\*&SDD (for Cu & I)/SMD(water)

Energy = -1166.20898919 A.U.

|    |             |             |             |
|----|-------------|-------------|-------------|
| Cu | 0.72301300  | 0.32524400  | -0.20305400 |
| C  | 3.01824500  | 0.73401600  | 1.36646300  |
| C  | 2.62551800  | 0.62650300  | 0.04211900  |
| C  | 3.33794900  | 1.15375400  | -1.02266400 |
| C  | 4.51313900  | 1.85222700  | -0.72815000 |
| C  | 4.94179500  | 1.99303400  | 0.59303200  |
| C  | 4.19720900  | 1.43915800  | 1.63445500  |
| H  | 2.44007900  | 0.28781500  | 2.16994500  |
| H  | 3.00046600  | 1.03478100  | -2.04713500 |
| H  | 5.09116500  | 2.28176300  | -1.54134800 |
| H  | 5.85965000  | 2.53069700  | 0.81010700  |
| H  | 4.52932100  | 1.54258300  | 2.66348300  |
| C  | -1.94876000 | 1.42138700  | 0.03095600  |
| O  | -1.38645200 | 0.12136800  | -0.26301900 |
| C  | -2.07514500 | -0.97511700 | 0.32919000  |

|   |             |             |             |
|---|-------------|-------------|-------------|
| C | -3.49196000 | -1.00726300 | -0.23414400 |
| H | -3.40799600 | -1.16292800 | -1.31848300 |
| C | -3.36001300 | 1.47206700  | -0.54137100 |
| H | -3.30727900 | 1.37337000  | -1.63566300 |
| C | -4.19312200 | 0.32152900  | 0.01934500  |
| H | -4.32307100 | 0.46713900  | 1.09980000  |
| I | 1.74725300  | -1.96261200 | -0.51411900 |
| C | -0.98095700 | 2.42290600  | -0.58101200 |
| H | -1.03066500 | 2.31684800  | -1.67971900 |
| H | -1.33338000 | 3.43442100  | -0.33159600 |
| O | 0.32185800  | 2.22132200  | -0.09664600 |
| O | -4.18316500 | -2.08665500 | 0.36516400  |
| H | -5.07755000 | -2.10990100 | -0.01522300 |
| O | -5.46528200 | 0.24806500  | -0.61189300 |
| H | -6.06512500 | 0.87922100  | -0.18281700 |
| O | -3.91707600 | 2.72938100  | -0.18905700 |
| H | -4.75369100 | 2.84056400  | -0.67015000 |
| H | -1.97640700 | 1.55218800  | 1.12109300  |
| O | -2.14709900 | -0.85701800 | 1.71603700  |
| C | -0.88253200 | -0.94329000 | 2.36676900  |
| H | -1.08428000 | -0.94182000 | 3.43861500  |
| H | -0.37068000 | -1.87042500 | 2.08539100  |
| H | -0.24990100 | -0.08236900 | 2.11525000  |
| H | -1.50292800 | -1.86474000 | 0.04069600  |

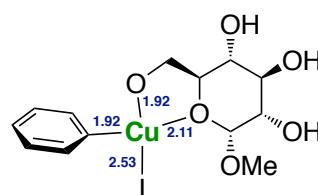

INT<sub>2-6</sub>

at M06-2X/6-31+G\*&SDD (for Cu & I)/SMD(water)

Energy = -1165.961403 A.U.

Thermal correction to Gibbs Free Energy =

0.257125 A.U.

Sum of electronic and thermal Free Energies =

-1165.704278 A.U.

at M06-2X/6-311+G\*&SDD (for Cu & I)/SMD(water)



Energy = -1166.20868312 A.U.

|    |             |             |             |
|----|-------------|-------------|-------------|
| Cu | 0.73308000  | 0.32797700  | -0.20040500 |
| C  | 3.00071000  | 0.81016300  | 1.37785700  |
| C  | 2.60083300  | 0.71585100  | 0.05655600  |
| C  | 3.34344100  | 1.17426300  | -1.01739400 |
| C  | 4.57185200  | 1.78142600  | -0.73553200 |
| C  | 5.01480300  | 1.90457800  | 0.58261000  |
| C  | 4.23309700  | 1.42427600  | 1.63337000  |
| H  | 2.39138900  | 0.42259100  | 2.18897400  |
| H  | 2.99345500  | 1.06835800  | -2.03917900 |
| H  | 5.17916000  | 2.15314100  | -1.55593400 |
| H  | 5.97222000  | 2.37263700  | 0.79018900  |
| H  | 4.57602100  | 1.51538600  | 2.66002200  |
| C  | -1.92229800 | 1.43172700  | 0.01422900  |
| O  | -1.36437700 | 0.12198900  | -0.25066700 |
| C  | -2.06206000 | -0.95746900 | 0.36646600  |
| C  | -3.47766300 | -0.99235300 | -0.20037600 |
| H  | -3.39155600 | -1.17716300 | -1.27993500 |
| C  | -3.32804800 | 1.47795600  | -0.57036300 |
| H  | -3.26812000 | 1.35087800  | -1.66129800 |
| C  | -4.17112300 | 0.34729800  | 0.01523400  |
| H  | -4.30504000 | 0.52168600  | 1.09096500  |
| I  | 1.67945500  | -1.99867900 | -0.52604800 |
| C  | -0.94162800 | 2.41165900  | -0.60770500 |
| H  | -0.97390400 | 2.28358500  | -1.70397200 |
| H  | -1.28056100 | 3.43266300  | -0.38230400 |
| O  | 0.35284600  | 2.20884800  | -0.09713400 |
| O  | -4.17851000 | -2.05035400 | 0.42525600  |
| H  | -5.07263100 | -2.07595500 | 0.04429700  |
| O  | -5.44046900 | 0.26563600  | -0.62020000 |
| H  | -6.03832000 | 0.91143500  | -0.21049900 |
| O  | -3.87799500 | 2.74761600  | -0.25346900 |
| H  | -4.71125300 | 2.85300300  | -0.74177600 |
| H  | -1.95726800 | 1.58341000  | 1.10119300  |
| O  | -2.13527600 | -0.80481600 | 1.74913000  |
| C  | -0.87226200 | -0.88549000 | 2.40414700  |
| H  | -1.07561200 | -0.85193900 | 3.47513900  |

|   |             |             |            |
|---|-------------|-------------|------------|
| H | -0.36900700 | -1.82487600 | 2.14932500 |
| H | -0.23149400 | -0.03782300 | 2.12963900 |
| H | -1.49556400 | -1.85702200 | 0.09952400 |

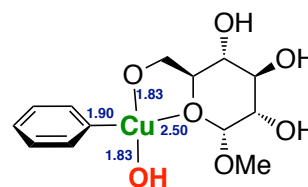

INT<sub>3-6</sub>

at M06-2X/6-31+G\*&SDD (for Cu)/SMD(water)

Energy = -1230.339072 A.U.

Thermal correction to Gibbs Free Energy =  
0.270529 A.U.

Sum of electronic and thermal Free Energies =  
-1230.068543 A.U.

at M06-2X/6-311+G\*&SDD (for Cu)/SMD(water)

Energy = -1230.6099395 A.U.

|    |             |             |             |
|----|-------------|-------------|-------------|
| Cu | 1.39435900  | 1.02194200  | -0.56975100 |
| C  | 4.03611900  | 0.05305000  | -0.38368600 |
| C  | 2.76630400  | -0.07374300 | 0.14856900  |
| C  | 2.41999400  | -0.94158900 | 1.16594500  |
| C  | 3.43832300  | -1.75232800 | 1.68356600  |
| C  | 4.73558300  | -1.66627100 | 1.17797200  |
| C  | 5.03473900  | -0.76860300 | 0.15205300  |
| H  | 4.25447300  | 0.75113700  | -1.18548800 |
| H  | 1.40646800  | -1.00059900 | 1.55142900  |
| H  | 3.20585400  | -2.44790600 | 2.48467300  |
| H  | 5.51689500  | -2.30094400 | 1.58469900  |
| H  | 6.04455100  | -0.70175700 | -0.24230800 |
| C  | -1.19407600 | -0.59464900 | -0.90143300 |
| O  | -0.81973700 | 0.19567500  | 0.23519900  |
| C  | -1.86112900 | 0.97076500  | 0.79413900  |
| C  | -2.98059400 | 0.04665500  | 1.26455300  |
| H  | -2.56560300 | -0.58863600 | 2.05799900  |
| C  | -2.26892700 | -1.59141300 | -0.48314200 |
| H  | -1.85358700 | -2.27368600 | 0.27488900  |
| C  | -3.45093000 | -0.84418400 | 0.11814700  |

|   |             |             |             |
|---|-------------|-------------|-------------|
| H | -3.91544800 | -0.22669800 | -0.66187100 |
| C | 0.08867000  | -1.24885400 | -1.38986000 |
| H | 0.48137500  | -1.89256300 | -0.58346600 |
| H | -0.14813300 | -1.89604500 | -2.24462200 |
| O | 1.03897800  | -0.29615000 | -1.79474000 |
| O | -4.03382200 | 0.84437700  | 1.77602100  |
| H | -4.63532200 | 0.26835100  | 2.27546400  |
| O | -4.38275500 | -1.81625700 | 0.57788800  |
| H | -5.26839400 | -1.41940000 | 0.59675900  |
| O | -2.66282000 | -2.32101700 | -1.63427000 |
| H | -3.41449700 | -2.88447700 | -1.38299600 |
| H | -1.59009600 | 0.06405000  | -1.68783000 |
| O | -2.38920600 | 1.88184200  | -0.12734700 |
| C | -1.43180100 | 2.83546900  | -0.57387900 |
| H | -1.97931400 | 3.59143900  | -1.13839700 |
| H | -0.92945200 | 3.30247200  | 0.28140900  |
| H | -0.68580900 | 2.36656300  | -1.22818200 |
| H | -1.40278000 | 1.50439300  | 1.63582500  |
| O | 1.79046200  | 2.41171400  | 0.55131200  |
| H | 2.71996100  | 2.40068200  | 0.82463200  |

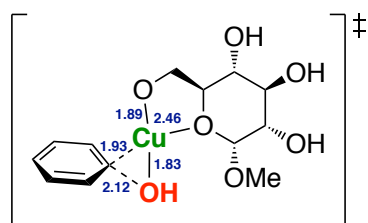

**TS<sub>RE-6</sub>**

at M06-2X/6-31+G\*&SDD (for Cu)/SMD(water)

Energy = -1230.3322 A.U.

Thermal correction to Gibbs Free Energy =

0.270248 A.U.

Sum of electronic and thermal Free Energies =

-1230.061952 A.U.

at M06-2X/6-311+G\*&SDD (for Cu)/ SMD(water)

Energy = -1230.60318610 A.U.

|    |            |            |             |
|----|------------|------------|-------------|
| Cu | 1.38261200 | 0.94747700 | -0.64864800 |
| C  | 4.09328800 | 0.15199400 | -0.26237100 |

|   |             |             |             |
|---|-------------|-------------|-------------|
| C | 2.83202100  | 0.09838100  | 0.30282300  |
| C | 2.43629800  | -0.80768800 | 1.27050100  |
| C | 3.38353400  | -1.75223100 | 1.67883300  |
| C | 4.66865900  | -1.74936500 | 1.13375200  |
| C | 5.02001100  | -0.80348600 | 0.16966000  |
| H | 4.35354500  | 0.89239400  | -1.01180900 |
| H | 1.43741900  | -0.78729600 | 1.69537900  |
| H | 3.10802100  | -2.48429400 | 2.43237000  |
| H | 5.39816900  | -2.48202100 | 1.46420900  |
| H | 6.01884900  | -0.79953100 | -0.25695100 |
| C | -1.27120600 | -0.56966100 | -0.96474700 |
| O | -0.80793800 | 0.18009200  | 0.16793000  |
| C | -1.78857100 | 0.97975100  | 0.79427400  |
| C | -2.90636200 | 0.08278300  | 1.31739700  |
| H | -2.46569000 | -0.56949300 | 2.08253900  |
| C | -2.33619300 | -1.55193100 | -0.49083900 |
| H | -1.88642700 | -2.25071600 | 0.23169000  |
| C | -3.46198800 | -0.78746300 | 0.19267900  |
| H | -3.96081900 | -0.15192500 | -0.55113200 |
| C | -0.03439600 | -1.22180400 | -1.56726900 |
| H | 0.40400200  | -1.88805100 | -0.79962600 |
| H | -0.35413400 | -1.85598200 | -2.40655200 |
| O | 0.89074700  | -0.26405800 | -2.00950100 |
| O | -3.90977300 | 0.90261000  | 1.89174500  |
| H | -4.48059500 | 0.34488000  | 2.44514200  |
| O | -4.38414600 | -1.74621700 | 0.69827400  |
| H | -5.25028800 | -1.32221900 | 0.81052600  |
| O | -2.82238900 | -2.26225500 | -1.61896600 |
| H | -3.56460600 | -2.81481500 | -1.31973800 |
| H | -1.70912900 | 0.11949200  | -1.70145000 |
| O | -2.33849000 | 1.92029300  | -0.08493500 |
| C | -1.37094400 | 2.83240200  | -0.59357500 |
| H | -1.92051400 | 3.61157400  | -1.12356200 |
| H | -0.79540800 | 3.27695100  | 0.22732800  |
| H | -0.68682000 | 2.33208700  | -1.29071100 |
| H | -1.26688900 | 1.48831000  | 1.61474200  |
| O | 2.01387300  | 2.01492200  | 0.70308100  |
| H | 2.80559400  | 2.49064400  | 0.40068100  |

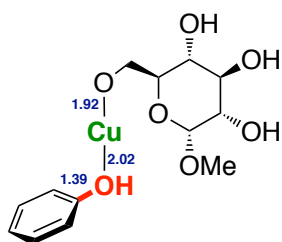

INT<sub>4-6</sub>

at M06-2X/6-31+G\*&SDD (for Cu)/SMD(water)

Energy = -1230.429038 A.U.

Thermal correction to Gibbs Free Energy =

0.273672 A.U.

Sum of electronic and thermal Free Energies =

-1230.155366 A.U.

at M06-2X/6-311+G\*&SDD (for Cu)/ SMD(water)

Energy = -1230.70050210 A.U.

|    |             |             |             |
|----|-------------|-------------|-------------|
| Cu | 1.18841500  | 2.17575100  | -0.01121300 |
| C  | 4.07516000  | -0.65243900 | 0.70315800  |
| C  | 3.25994800  | 0.10733000  | -0.12932200 |
| C  | 2.58928200  | -0.45867000 | -1.20880600 |
| C  | 2.73177200  | -1.82349600 | -1.45030800 |
| C  | 3.53664200  | -2.60912100 | -0.62204800 |
| C  | 4.20669800  | -2.01824500 | 0.44992600  |
| H  | 4.58581500  | -0.18266100 | 1.53980200  |
| H  | 1.95406200  | 0.16866300  | -1.83000600 |
| H  | 2.20504800  | -2.27397500 | -2.28651900 |
| H  | 3.64077900  | -3.67275300 | -0.81164000 |
| H  | 4.83574000  | -2.62016600 | 1.09898300  |
| C  | -1.84277700 | 1.01276700  | 0.06486600  |
| O  | -0.81631800 | 0.17376200  | -0.48739400 |
| C  | -0.83433300 | -1.16702400 | -0.04366400 |
| C  | -2.16030000 | -1.81771700 | -0.42347600 |
| H  | -2.22666000 | -1.80850800 | -1.51925600 |
| C  | -3.21281900 | 0.43845300  | -0.29822800 |
| H  | -3.34156200 | 0.48353000  | -1.39143200 |
| C  | -3.31873800 | -1.01144800 | 0.14746000  |
| H  | -3.29033400 | -1.05051400 | 1.24462300  |
| C  | -1.63664900 | 2.41425700  | -0.50112100 |

|   |             |             |             |
|---|-------------|-------------|-------------|
| H | -1.59916400 | 2.30806600  | -1.60221800 |
| H | -2.54768400 | 2.98892900  | -0.26884300 |
| O | -0.51120200 | 3.07540400  | 0.00299300  |
| O | -2.15789400 | -3.15243000 | 0.05560700  |
| H | -2.88042000 | -3.63479900 | -0.37863400 |
| O | -4.56991000 | -1.50719300 | -0.31682900 |
| H | -4.80852900 | -2.29411300 | 0.19938800  |
| O | -4.20872300 | 1.22447700  | 0.34045000  |
| H | -5.06439300 | 0.78700100  | 0.19181400  |
| H | -1.73934500 | 1.04240600  | 1.15970900  |
| O | -0.67038000 | -1.26750900 | 1.34418500  |
| C | 0.64190100  | -0.91708400 | 1.77169700  |
| H | 0.66757500  | -1.04930300 | 2.85438200  |
| H | 1.38056700  | -1.57781000 | 1.30013600  |
| H | 0.87033200  | 0.12903200  | 1.52540700  |
| H | 0.00151900  | -1.65682900 | -0.55848900 |
| O | 3.07658300  | 1.46325900  | 0.08662100  |
| H | 3.54066900  | 1.75346600  | 0.89207800  |

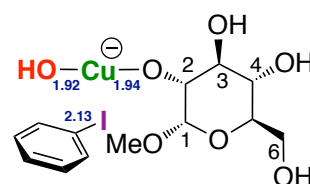

INT<sub>1-2\_anion</sub>

at M06-2X/6-31+G\*&SDD (for Cu & I)/SMD(water)

Energy = -1241.935354 A.U.

Thermal correction to Gibbs Free Energy =

0.261459 A.U.

Sum of electronic and thermal Free Energies =

-1241.673895 A.U.

at M06-2X/6-311+G\*&SDD (for Cu & I)/SMD(water)

Energy = -1242.20863135 A.U.

|   |            |             |             |
|---|------------|-------------|-------------|
| C | 2.52473900 | -0.12574800 | 1.61611000  |
| C | 2.83535100 | -0.29692300 | 0.26913700  |
| C | 3.45328400 | 0.71260600  | -0.46634700 |
| C | 3.78615700 | 1.90868000  | 0.17257800  |
| C | 3.49947900 | 2.08944600  | 1.52592700  |

|    |             |             |             |
|----|-------------|-------------|-------------|
| C  | 2.85858300  | 1.07787500  | 2.24117800  |
| H  | 2.04139500  | -0.91917000 | 2.17760300  |
| H  | 3.68056300  | 0.57139600  | -1.51824100 |
| H  | 4.27205400  | 2.69774700  | -0.39397300 |
| H  | 3.76688500  | 3.01966700  | 2.01952600  |
| H  | 2.62145300  | 1.21562700  | 3.29220200  |
| O  | -0.90619100 | -0.52818000 | 1.02872200  |
| I  | 2.39362800  | -2.15244600 | -0.67019800 |
| Cu | 0.36670100  | 2.20849900  | -0.26415600 |
| H  | -0.20720000 | -2.38616800 | 1.64263200  |
| C  | -0.80429400 | -1.54433300 | 2.01726800  |
| H  | -1.79543200 | -1.90688700 | 2.31348500  |
| H  | -0.31072000 | -1.09894200 | 2.88263500  |
| C  | -1.39311700 | -0.99898700 | -0.20022700 |
| H  | -0.77582000 | -1.83694300 | -0.54724900 |
| O  | -2.69789700 | -1.54037400 | -0.07542100 |
| C  | -1.38697600 | 0.14943900  | -1.21439800 |
| C  | -3.68621600 | -0.61164100 | 0.36978300  |
| H  | -1.74392000 | -0.30151700 | -2.15960800 |
| C  | -2.43929200 | 1.18635600  | -0.79924900 |
| O  | -0.13220600 | 0.72032100  | -1.39904600 |
| H  | -3.39638400 | -0.20623800 | 1.35202200  |
| C  | -3.80664500 | 0.55510200  | -0.62122000 |
| C  | -4.97975200 | -1.39077300 | 0.51525000  |
| H  | -2.13656000 | 1.63515600  | 0.16203400  |
| O  | -2.51971900 | 2.20840100  | -1.78485900 |
| H  | -4.16852300 | 0.18064300  | -1.58924600 |
| O  | -4.68996300 | 1.55338100  | -0.12096600 |
| H  | -5.80059200 | -0.70604600 | 0.75684000  |
| H  | -5.20977200 | -1.89634000 | -0.42761700 |
| O  | -4.87765000 | -2.41056300 | 1.50196200  |
| H  | -1.59789200 | 2.48315900  | -1.95070600 |
| H  | -5.60115700 | 1.32525100  | -0.36286900 |
| H  | -4.75664500 | -1.98773000 | 2.36815300  |
| O  | 0.74052100  | 3.78542800  | 0.76310300  |
| H  | 1.51871400  | 3.57660700  | 1.30067900  |

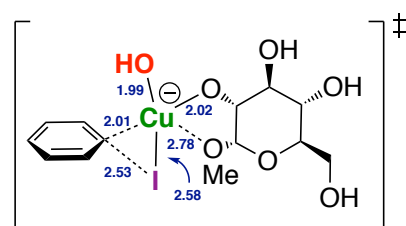

TS<sub>OA-2\_anion</sub>

at M06-2X/6-31+G\*&SDD (for Cu & I)/SMD(water)

Energy = -1241.8956369999999 A.U.

Thermal correction to Gibbs Free Energy =

0.263346 A.U.

Sum of electronic and thermal Free Energies =

-1241.632291 A.U.

at M06-2X/6-311+G\*&SDD (for Cu & I)/SMD(water)

Energy = -1242.16926554 A.U.

|    |             |             |             |
|----|-------------|-------------|-------------|
| C  | 2.38957400  | 0.56352100  | 1.80881100  |
| C  | 2.66171000  | 0.48519900  | 0.44587400  |
| C  | 3.74740100  | 1.13763200  | -0.13417700 |
| C  | 4.56039100  | 1.92755300  | 0.68158100  |
| C  | 4.29771600  | 2.04047800  | 2.04846900  |
| C  | 3.21507100  | 1.35946700  | 2.60722300  |
| H  | 1.55046900  | 0.02844600  | 2.24206900  |
| H  | 3.95240700  | 1.04446900  | -1.19613200 |
| H  | 5.40390400  | 2.45159700  | 0.24098500  |
| H  | 4.93854600  | 2.65161400  | 2.67657400  |
| H  | 3.00656400  | 1.44003600  | 3.67037300  |
| O  | -1.09264300 | -0.62052700 | 0.78925400  |
| I  | 2.18231300  | -1.77523900 | -0.58671800 |
| Cu | 0.99065400  | 0.51231900  | -0.66662100 |
| H  | -0.66081200 | -2.54698200 | 1.43759700  |
| C  | -1.00945000 | -1.58383000 | 1.83138000  |
| H  | -1.98278900 | -1.72124500 | 2.31635300  |
| H  | -0.29394400 | -1.20751700 | 2.56398000  |
| C  | -1.87962600 | -1.04944900 | -0.29043200 |
| H  | -1.53842400 | -2.03591700 | -0.63222400 |
| O  | -3.23000000 | -1.23967500 | 0.10180900  |
| C  | -1.80817000 | -0.01528700 | -1.41698700 |
| C  | -3.86582300 | -0.06417700 | 0.60806400  |

|   |             |             |             |    |             |             |             |
|---|-------------|-------------|-------------|----|-------------|-------------|-------------|
| H | -2.48382900 | -0.40673200 | -2.20165200 | C  | 4.05149200  | 2.38609100  | 2.05070600  |
| C | -2.43505700 | 1.28939500  | -0.91004700 | C  | 2.76695100  | 2.02152200  | 2.45446900  |
| O | -0.53949300 | 0.19087900  | -1.93950300 | H  | 0.93256600  | 1.01086800  | 1.90215600  |
| H | -3.32424400 | 0.29221700  | 1.49806500  | H  | 4.03794900  | 1.05907300  | -1.09324200 |
| C | -3.85934100 | 1.05708400  | -0.44415300 | H  | 5.50788200  | 2.32515600  | 0.45924100  |
| C | -5.26954700 | -0.47293000 | 1.01177100  | H  | 4.69697500  | 2.93760700  | 2.72762100  |
| H | -1.84928800 | 1.67245900  | -0.06067800 | H  | 2.40650000  | 2.28763700  | 3.44423700  |
| O | -2.42230700 | 2.25073900  | -1.95801100 | O  | -1.27245900 | -1.06727500 | 0.70947500  |
| H | -4.47986200 | 0.76103400  | -1.30191600 | I  | 2.10295500  | -1.97452400 | -0.14586500 |
| O | -4.34787400 | 2.27226300  | 0.11500600  | Cu | 1.07272300  | 0.28993700  | -0.85904100 |
| H | -5.84162800 | 0.41149900  | 1.31432300  | H  | -1.28676800 | -3.07792100 | 1.22600000  |
| H | -5.77260400 | -0.94285400 | 0.16116700  | C  | -1.41992100 | -2.08946600 | 1.68391000  |
| O | -5.26234100 | -1.43857700 | 2.05656600  | H  | -2.40539900 | -2.03918100 | 2.16184700  |
| H | -1.54905800 | 2.14357400  | -2.38152800 | H  | -0.64415100 | -1.92893800 | 2.43501400  |
| H | -5.31575400 | 2.28567600  | 0.05360000  | C  | -2.10962500 | -1.22682400 | -0.40306400 |
| H | -4.88935000 | -1.02370100 | 2.85181000  | H  | -2.02540500 | -2.24965600 | -0.79318000 |
| O | 0.74213500  | 2.47365400  | -0.41884700 | O  | -3.47472800 | -1.07518300 | -0.04740400 |
| H | 1.48923800  | 2.77475300  | 0.12081800  | C  | -1.71776100 | -0.19434600 | -1.46368500 |

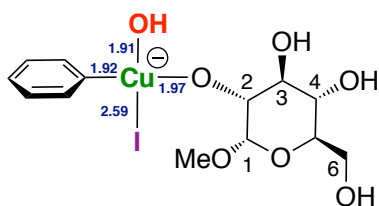

INT<sub>2-2</sub>\_anion

at M06-2X/6-31+G\*&SDD (for Cu & I)/SMD(water)

Energy = -1241.904159 A.U.

Thermal correction to Gibbs Free Energy =

0.265844 A.U.

Sum of electronic and thermal Free Energies =

-1241.638315 A.U.

at M06-2X/6-311+G\*&SDD (for Cu & I)/SMD(water)

Energy = -1242.1767782 A.U.

|   |            |            |             |   |             |             |             |
|---|------------|------------|-------------|---|-------------|-------------|-------------|
| C | 1.93174200 | 1.30487200 | 1.58888400  | H | -5.15941000 | -0.57892700 | 2.67075000  |
| C | 2.41629300 | 0.97682300 | 0.33086700  | O | 0.93554400  | 2.06643700  | -1.56030600 |
| C | 3.68588500 | 1.32958200 | -0.10209100 | H | 1.35074800  | 2.71056200  | -0.96756600 |
| C | 4.50821700 | 2.04166200 | 0.77669700  |   |             |             |             |

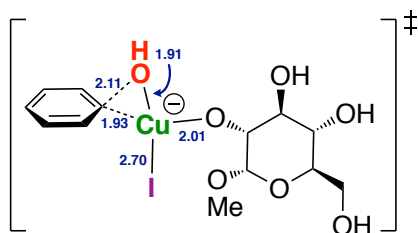

**TS<sub>RE-2</sub>\_anion**

at M06-2X/6-31+G\*&SDD (for Cu & I)/SMD(water)

Energy = -1241.8943290000002 A.U.

Thermal correction to Gibbs Free Energy =

0.26455 A.U.

Sum of electronic and thermal Free Energies =

-1241.629779 A.U.

at M06-2X/6-311+G\*&SDD (for Cu & I)/SMD(water)

Energy = -1242.16636544

|    |             |             |             |
|----|-------------|-------------|-------------|
| C  | 1.72345000  | 1.59747900  | 1.49817000  |
| C  | 2.21960000  | 1.41056700  | 0.21880800  |
| C  | 3.53701800  | 1.62769400  | -0.14642700 |
| C  | 4.42458700  | 2.01276600  | 0.86307900  |
| C  | 3.97863800  | 2.18197300  | 2.17553700  |
| C  | 2.63404100  | 1.97442800  | 2.49005100  |
| H  | 0.67174500  | 1.44305600  | 1.72583000  |
| H  | 3.87490200  | 1.48202400  | -1.16805400 |
| H  | 5.46947000  | 2.17511900  | 0.61414900  |
| H  | 4.67649600  | 2.48267300  | 2.95065900  |
| H  | 2.28144700  | 2.11110900  | 3.50835800  |
| O  | -1.22078500 | -1.08112400 | 0.68404500  |
| I  | 2.20961200  | -1.99196300 | -0.16071300 |
| Cu | 1.04867300  | 0.33991000  | -0.87929100 |
| H  | -1.18824300 | -3.07953300 | 1.24531000  |
| C  | -1.32426800 | -2.08313100 | 1.68477900  |
| H  | -2.29634000 | -2.03705100 | 2.18997200  |
| H  | -0.52975200 | -1.89369700 | 2.40906700  |
| C  | -2.08339100 | -1.27979800 | -0.40277400 |
| H  | -1.98898300 | -2.30902800 | -0.77319500 |
| O  | -3.44207700 | -1.14771000 | -0.01414300 |
| C  | -1.73658300 | -0.26344800 | -1.49526800 |
| C  | -3.76050000 | 0.12788000  | 0.54148000  |

|   |             |             |             |
|---|-------------|-------------|-------------|
| H | -2.47518900 | -0.43846400 | -2.30060400 |
| C | -2.01601000 | 1.14183300  | -0.93733500 |
| O | -0.44481400 | -0.42108300 | -1.98495100 |
| H | -3.15420500 | 0.29683600  | 1.44505600  |
| C | -3.45520300 | 1.25531800  | -0.45817700 |
| C | -5.22607300 | 0.07976800  | 0.92984500  |
| H | -1.35373700 | 1.32348300  | -0.07488600 |
| O | -1.76554200 | 2.13338300  | -1.92183900 |
| H | -4.13166700 | 1.17520400  | -1.32150600 |
| O | -3.61514800 | 2.52347800  | 0.16902700  |
| H | -5.54980000 | 1.06646700  | 1.27999100  |
| H | -5.82695800 | -0.19862800 | 0.05866900  |
| O | -5.48164000 | -0.90596900 | 1.92383600  |
| H | -0.78966000 | 2.25617400  | -1.91360700 |
| H | -4.54703300 | 2.78792700  | 0.12070500  |
| H | -5.02938300 | -0.64077100 | 2.74164000  |
| O | 0.88048800  | 2.21669800  | -1.19182000 |
| H | 1.59023700  | 2.47239100  | -1.80413900 |

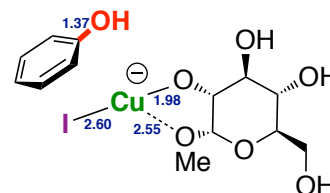

**INT<sub>3-2</sub>\_anion**

at M06-2X/6-31+G\*&SDD (for Cu & I)/SMD(water)

Energy = -1242.0056980000002 A.U.

Thermal correction to Gibbs Free Energy =

0.263779 A.U.

Sum of electronic and thermal Free Energies =

-1241.741919 A.U.

at M06-2X/6-311+G\*&SDD (for Cu & I)/SMD(water)

Energy = -1242.27693361

|   |            |            |             |
|---|------------|------------|-------------|
| C | 1.00212200 | 2.67776600 | 1.18140500  |
| C | 1.49199800 | 3.01472300 | -0.08139800 |
| C | 2.79781400 | 2.68967500 | -0.44964500 |
| C | 3.62274400 | 2.03718600 | 0.46669900  |

|    |             |             |             |
|----|-------------|-------------|-------------|
| C  | 3.15019200  | 1.70212800  | 1.73575800  |
| C  | 1.83598800  | 2.01997000  | 2.08439400  |
| H  | -0.02100700 | 2.93620100  | 1.44144200  |
| H  | 3.15985200  | 2.95171400  | -1.44067500 |
| H  | 4.63937500  | 1.78477700  | 0.17901900  |
| H  | 3.79505800  | 1.18800800  | 2.44162800  |
| H  | 1.45346700  | 1.75709600  | 3.06646400  |
| O  | -1.13861900 | -1.36515700 | 0.10505900  |
| I  | 2.89293800  | -1.94836700 | 0.08323200  |
| Cu | 1.04028400  | -0.26953900 | -0.64488600 |
| H  | -0.79590000 | -3.32944900 | -0.47129700 |
| C  | -1.13774900 | -2.75562900 | 0.39929500  |
| H  | -2.13814300 | -3.09451800 | 0.69197900  |
| H  | -0.44578200 | -2.90498800 | 1.22975500  |
| C  | -1.92788600 | -1.02436800 | -1.00410400 |
| H  | -1.69501000 | -1.68855800 | -1.84656100 |
| O  | -3.30421500 | -1.22819000 | -0.73676200 |
| C  | -1.65994700 | 0.43998000  | -1.36930900 |
| C  | -3.80171700 | -0.46285900 | 0.36209500  |
| H  | -2.31466000 | 0.64373100  | -2.23844700 |
| C  | -2.15916200 | 1.33066000  | -0.22546100 |
| O  | -0.33350000 | 0.70089100  | -1.68701400 |
| H  | -3.25329300 | -0.73376600 | 1.27730000  |
| C  | -3.61287800 | 1.03949000  | 0.10552100  |
| C  | -5.26198400 | -0.83981500 | 0.52672700  |
| H  | -1.54824500 | 1.13594800  | 0.67176700  |
| O  | -2.04835700 | 2.70105100  | -0.58421300 |
| H  | -4.24098900 | 1.34625100  | -0.74324600 |
| O  | -3.96055600 | 1.79017700  | 1.26479200  |
| H  | -5.72745100 | -0.19965600 | 1.28479200  |
| H  | -5.78527400 | -0.69560500 | -0.42351800 |
| O  | -5.42260700 | -2.21114200 | 0.86923500  |
| H  | -1.11891400 | 2.86431700  | -0.84268000 |
| H  | -4.91515900 | 1.96108100  | 1.26158200  |
| H  | -5.06174700 | -2.34759200 | 1.76068500  |
| O  | 0.63714800  | 3.67510300  | -0.93064300 |
| H  | 1.04831900  | 3.78976500  | -1.80507300 |

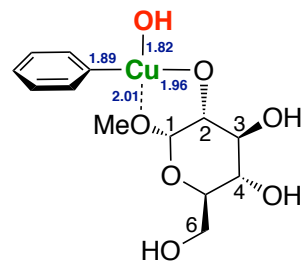

INT<sub>3-2\_-1</sub>

at M06-2X/6-31+G\*&SDD (for Cu)/SMD(water)

Energy = -1230.332157 A.U.

Thermal correction to Gibbs Free Energy =

0.270863 A.U.

Sum of electronic and thermal Free Energies =

-1230.061294 A.U.

at M06-2X/6-311+G\*&SDD (for Cu)/SMD(water)

Energy = -1230.60334915 A.U.

|    |             |             |             |
|----|-------------|-------------|-------------|
| C  | 3.69641800  | 0.46151300  | -1.01997900 |
| C  | 3.07847400  | -0.06204000 | 0.10322900  |
| C  | 3.48338100  | 0.19904600  | 1.40191600  |
| C  | 4.57430400  | 1.05730200  | 1.58027300  |
| C  | 5.21930700  | 1.61339000  | 0.47440000  |
| C  | 4.78512900  | 1.31871900  | -0.81863300 |
| H  | 3.35397600  | 0.22086400  | -2.02226000 |
| H  | 2.97510900  | -0.24102100 | 2.25514900  |
| H  | 4.91467500  | 1.28564100  | 2.58619000  |
| H  | 6.06628500  | 2.27672000  | 0.62123300  |
| H  | 5.28999900  | 1.75032700  | -1.67802600 |
| O  | 2.54862400  | -2.53279200 | -0.24039500 |
| H  | 3.49205100  | -2.32525100 | -0.16730900 |
| Cu | 1.48506500  | -1.05893400 | -0.11847100 |
| O  | -0.22698800 | -1.97667200 | -0.37936600 |
| C  | -1.23696200 | -1.08123400 | -0.01885600 |
| C  | -2.60917500 | -1.46909300 | -0.57398600 |
| C  | -0.89520300 | 0.31261300  | -0.53426100 |
| H  | -1.32851500 | -1.00732100 | 1.08246900  |
| C  | -3.64141700 | -0.37535800 | -0.27542900 |
| H  | -2.53478700 | -1.57796000 | -1.66121400 |
| O  | -3.05423700 | -2.71971900 | -0.07998400 |

|   |             |             |             |
|---|-------------|-------------|-------------|
| C | -1.95976800 | 1.33016700  | -0.14558100 |
| H | -0.78278000 | 0.28755800  | -1.62588100 |
| O | 0.39740300  | 0.60135700  | 0.05241400  |
| O | -3.87879800 | -0.38020800 | 1.10558800  |
| H | -4.57651000 | -0.55590700 | -0.81944500 |
| O | -3.19190900 | 0.88686300  | -0.72755700 |
| H | -3.16811300 | -2.63681500 | 0.88298900  |
| H | -2.05857800 | 1.37809300  | 0.94771200  |
| C | -1.71871800 | 2.72043100  | -0.69955200 |
| H | 0.83184400  | 1.33568400  | -0.42012500 |
| C | -4.91242400 | 0.51723600  | 1.49767500  |
| H | -0.77690600 | 3.11786100  | -0.31220000 |
| H | -1.66010900 | 2.67251200  | -1.79500700 |
| O | -2.74004400 | 3.61896000  | -0.29061400 |
| H | -5.10309200 | 0.33673300  | 2.55611500  |
| H | -5.82383900 | 0.32348300  | 0.91923800  |
| H | -4.60228900 | 1.55786900  | 1.35360900  |
| H | -3.58781600 | 3.27156800  | -0.61556900 |

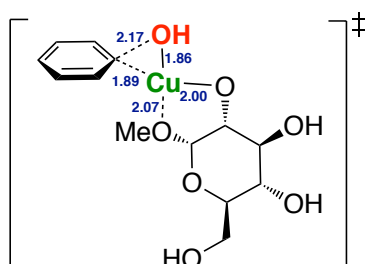

TS<sub>RE-2</sub>-I

at M06-2X/6-31+G\*&SDD (for Cu)/SMD(water)

Energy = -1230.3269360000002 A.U.

Thermal correction to Gibbs Free Energy =

0.269557 A.U.

Sum of electronic and thermal Free Energies =

-1230.057379 A.U.

at M06-2X/6-311+G\*&SDD (for Cu)/SMD(water)

Energy = -1230.59849575 A.U.

|   |            |             |             |
|---|------------|-------------|-------------|
| C | 3.68442600 | 0.39228000  | -1.06403500 |
| C | 3.20239400 | -0.20909900 | 0.08598500  |
| C | 3.61637500 | 0.10311700  | 1.36931300  |

|    |             |             |             |
|----|-------------|-------------|-------------|
| C  | 4.57348200  | 1.11593000  | 1.50137500  |
| C  | 5.07960700  | 1.76196800  | 0.37309300  |
| C  | 4.63558700  | 1.40414400  | -0.90201700 |
| H  | 3.34140400  | 0.09011300  | -2.04889000 |
| H  | 3.21288900  | -0.40835200 | 2.23826200  |
| H  | 4.91700600  | 1.39353900  | 2.49368600  |
| H  | 5.82536700  | 2.54262500  | 0.48638300  |
| H  | 5.03216900  | 1.90473700  | -1.78050100 |
| O  | 2.90713000  | -2.30124400 | -0.25591100 |
| H  | 3.25237600  | -2.52009900 | 0.62581600  |
| Cu | 1.51971700  | -1.07655000 | -0.06030900 |
| O  | -0.24152200 | -1.98666000 | -0.37159100 |
| C  | -1.25277800 | -1.09302200 | -0.02153200 |
| C  | -2.61231600 | -1.46575900 | -0.62090400 |
| C  | -0.90380700 | 0.32015300  | -0.49033900 |
| H  | -1.37771300 | -1.04235000 | 1.07925400  |
| C  | -3.66146900 | -0.38868800 | -0.32644000 |
| H  | -2.50874000 | -1.54804400 | -1.70837100 |
| O  | -3.06592500 | -2.73155300 | -0.17129600 |
| C  | -1.99322000 | 1.31564900  | -0.10960800 |
| H  | -0.76565600 | 0.32040800  | -1.58023000 |
| O  | 0.35652300  | 0.62252800  | 0.13715700  |
| O  | -3.93925500 | -0.42710200 | 1.04738400  |
| H  | -4.58034900 | -0.56265900 | -0.89971000 |
| O  | -3.20867000 | 0.88656300  | -0.73558100 |
| H  | -3.18924400 | -2.67771800 | 0.79255300  |
| H  | -2.12349500 | 1.33237000  | 0.98170800  |
| C  | -1.74728700 | 2.72395600  | -0.61306000 |
| H  | 0.79964700  | 1.35422600  | -0.32827700 |
| C  | -4.98667500 | 0.45748400  | 1.43078300  |
| H  | -0.82131200 | 3.11682100  | -0.18537600 |
| H  | -1.65582300 | 2.71123700  | -1.70741000 |
| O  | -2.78894700 | 3.60171300  | -0.20784000 |
| H  | -5.20922500 | 0.24908800  | 2.47788600  |
| H  | -5.87981000 | 0.27747600  | 0.82016500  |
| H  | -4.67552500 | 1.50235000  | 1.32372300  |
| H  | -3.62634700 | 3.24153400  | -0.54595300 |



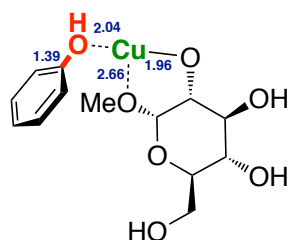

INT<sub>4-2\_-1</sub>

at M06-2X/6-31+G\*&SDD (for Cu)/SMD(water)

Energy = -1230.429318 A.U.

Thermal correction to Gibbs Free Energy =

0.272501 A.U.

Sum of electronic and thermal Free Energies =

-1230.156817 A.U.

at M06-2X/6-311+G\*&SDD (for Cu)/SMD(water)

Energy = -1230.70061611 A.U.

|    |             |             |             |
|----|-------------|-------------|-------------|
| C  | 2.77352100  | 0.55073000  | -1.23170000 |
| C  | 3.39109900  | -0.15456300 | -0.20141300 |
| C  | 3.99135400  | 0.49817100  | 0.87127000  |
| C  | 3.95745000  | 1.89295900  | 0.91382100  |
| C  | 3.33392600  | 2.61918900  | -0.10139200 |
| C  | 2.74705700  | 1.94338000  | -1.17407300 |
| H  | 2.31181000  | 0.00683800  | -2.05103400 |
| H  | 4.46138300  | -0.07846700 | 1.66352200  |
| H  | 4.41781200  | 2.40891300  | 1.75098800  |
| H  | 3.30549800  | 3.70341100  | -0.05823400 |
| H  | 2.26124200  | 2.49973400  | -1.97016000 |
| O  | 3.34961500  | -1.54234500 | -0.27506700 |
| H  | 3.90341800  | -1.93625900 | 0.42323000  |
| Cu | 1.42090300  | -2.15361700 | -0.00952500 |
| O  | -0.47614200 | -2.39999500 | 0.27247400  |
| C  | -1.28463200 | -1.26652700 | 0.38750700  |
| C  | -2.43190000 | -1.31842600 | -0.63380800 |
| C  | -0.52497400 | 0.05508500  | 0.20171100  |
| H  | -1.74204300 | -1.22229500 | 1.39681000  |
| C  | -3.28704500 | -0.05321600 | -0.62085900 |
| H  | -1.99923800 | -1.41618400 | -1.63585800 |
| O  | -3.25139100 | -2.46337000 | -0.44873400 |

|   |             |             |             |
|---|-------------|-------------|-------------|
| C | -1.47284800 | 1.25602700  | 0.19720400  |
| H | 0.01567900  | 0.01229300  | -0.75821400 |
| O | 0.40404500  | 0.18574200  | 1.27527300  |
| O | -3.98153300 | -0.01525300 | 0.59799100  |
| H | -3.99859100 | -0.04337500 | -1.45617700 |
| O | -2.47963700 | 1.08954300  | -0.80651800 |
| H | -3.66756200 | -2.39255200 | 0.42809700  |
| H | -1.95011600 | 1.34518100  | 1.18390200  |
| C | -0.77329800 | 2.55776900  | -0.14147100 |
| H | 1.17278000  | 0.69863600  | 0.97381300  |
| C | -4.88647800 | 1.07887900  | 0.69266300  |
| H | 0.03146000  | 2.74928100  | 0.57290900  |
| H | -0.34300300 | 2.48800400  | -1.15022900 |
| O | -1.66538100 | 3.66236300  | -0.05586600 |
| H | -5.46300200 | 0.93466600  | 1.60720200  |
| H | -5.56171600 | 1.09123100  | -0.17165800 |
| H | -4.34636800 | 2.03053200  | 0.74715800  |
| H | -2.41163000 | 3.48507500  | -0.65301900 |

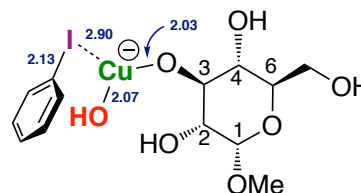

INT<sub>1-3\_anion</sub>

at M06-2X/6-31+G\*&SDD (for Cu & I)/SMD(water)

Energy = -1241.927892 A.U.

Thermal correction to Gibbs Free Energy =

0.261276 A.U.

Sum of electronic and thermal Free Energies =

-1241.666616 A.U.

at M06-2X/6-311+G\*&SDD (for Cu & I)/SMD(water)

Energy = -1242.20089953 A.U.

|   |             |            |             |
|---|-------------|------------|-------------|
| C | -2.66786800 | 1.20821900 | -1.20888400 |
| C | -3.48880700 | 0.67207300 | -0.21896800 |
| C | -4.23039100 | 1.48452400 | 0.63339300  |
| C | -4.13932700 | 2.87143400 | 0.48926500  |

|    |             |             |             |
|----|-------------|-------------|-------------|
| C  | -3.31830500 | 3.42740200  | -0.49136400 |
| C  | -2.58610000 | 2.59525800  | -1.33919200 |
| H  | -2.08544000 | 0.55922400  | -1.85619000 |
| H  | -4.86215700 | 1.05276100  | 1.40278500  |
| H  | -4.71162300 | 3.51336100  | 1.15247400  |
| H  | -3.24764300 | 4.50591300  | -0.59410400 |
| H  | -1.94088700 | 3.02062900  | -2.10238300 |
| I  | -3.53154000 | -1.44288300 | 0.03845600  |
| O  | -0.53213400 | 0.89936600  | 1.43688400  |
| H  | -1.36481500 | 1.38369100  | 1.32065700  |
| Cu | -0.70971400 | -0.88038100 | 0.40264000  |
| O  | 0.92197700  | -1.56472400 | -0.59258300 |
| C  | 1.95916100  | -0.71197600 | -0.20446800 |
| C  | 1.97926300  | 0.63851400  | -0.93958100 |
| C  | 3.30887800  | -1.39292000 | -0.44955500 |
| H  | 1.90987700  | -0.50087800 | 0.88288300  |
| C  | 3.19378500  | 1.46168500  | -0.49454000 |
| H  | 2.11116500  | 0.44134200  | -2.01268400 |
| O  | 0.79359700  | 1.39531300  | -0.80094300 |
| C  | 4.45613200  | -0.50746600 | 0.01522700  |
| H  | 3.42011600  | -1.58325500 | -1.53011800 |
| O  | 3.34853800  | -2.62497300 | 0.25878600  |
| O  | 3.02070100  | 1.82275100  | 0.85029800  |
| H  | 3.30559500  | 2.36433700  | -1.10906300 |
| O  | 4.39518300  | 0.73746800  | -0.69070300 |
| H  | 0.35573600  | 1.23782600  | 0.09867000  |
| H  | 4.36846100  | -0.32202900 | 1.09589400  |
| C  | 5.82111100  | -1.09088200 | -0.28559400 |
| H  | 2.44086200  | -2.97818100 | 0.18881800  |
| C  | 4.05315000  | 2.67102600  | 1.33681200  |
| H  | 5.93490200  | -2.05049600 | 0.22307500  |
| H  | 5.92135200  | -1.24876600 | -1.36800600 |
| O  | 6.86257000  | -0.24735800 | 0.19236900  |
| H  | 3.74959000  | 3.00204000  | 2.33096500  |
| H  | 4.17461000  | 3.54155700  | 0.68010200  |
| H  | 5.00534200  | 2.13328900  | 1.40673900  |
| H  | 6.74073300  | 0.62740300  | -0.21338900 |

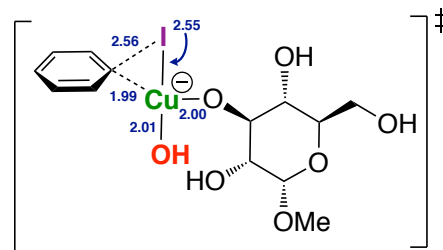

TS<sub>OA-3</sub>\_anion

at M06-2X/6-31+G\*&SDD (for Cu & I)/SMD(water)

Energy = -1241.903933 A.U.

Thermal correction to Gibbs Free Energy =

0.265785 A.U.

Sum of electronic and thermal Free Energies =

-1241.638148 A.U.

at M06-2X/6-311+G\*&SDD (for Cu & I)/SMD(water)

Energy = -1242.17737097 A.U.

|    |             |             |             |
|----|-------------|-------------|-------------|
| C  | -3.28881300 | 1.45930800  | -0.89336800 |
| C  | -2.99792000 | 0.65269800  | 0.20326300  |
| C  | -3.50000600 | 0.91244200  | 1.47518100  |
| C  | -4.29339800 | 2.04811800  | 1.65436600  |
| C  | -4.58667400 | 2.88567700  | 0.57616700  |
| C  | -4.08425300 | 2.59051700  | -0.69215700 |
| H  | -2.90138300 | 1.22300900  | -1.87982000 |
| H  | -3.27373000 | 0.25746700  | 2.31081300  |
| H  | -4.68402800 | 2.27183000  | 2.64310200  |
| H  | -5.20979900 | 3.76247600  | 0.72317600  |
| H  | -4.31145400 | 3.23619600  | -1.53578800 |
| I  | -2.87848100 | -1.84360800 | -0.36683400 |
| O  | -0.35267000 | 1.71322200  | 0.70951100  |
| H  | -1.06880200 | 2.36094200  | 0.61962300  |
| Cu | -1.13609800 | -0.05369200 | 0.16912700  |
| O  | 0.57171300  | -1.07207700 | -0.03144800 |
| C  | 1.75940700  | -0.34685800 | 0.05652900  |
| C  | 2.06155400  | 0.49668700  | -1.19071100 |
| C  | 2.92959600  | -1.31061200 | 0.26943000  |
| H  | 1.74547900  | 0.33081000  | 0.93077000  |
| C  | 3.42863600  | 1.17553900  | -1.05449200 |
| H  | 2.13316400  | -0.18054100 | -2.05385500 |

|   |            |             |             |
|---|------------|-------------|-------------|
| O | 1.06031500 | 1.45451700  | -1.47315400 |
| C | 4.24491000 | -0.55270300 | 0.38274200  |
| H | 2.98676800 | -1.99528100 | -0.59285700 |
| O | 2.72064400 | -2.05861400 | 1.46048200  |
| O | 3.35891600 | 2.12614500  | -0.02507300 |
| H | 3.72337000 | 1.66499300  | -1.99185500 |
| O | 4.44108400 | 0.21508900  | -0.81056200 |
| H | 0.53354900 | 1.63994700  | -0.62934800 |
| H | 4.21315500 | 0.12081100  | 1.25158300  |
| C | 5.45084600 | -1.46260200 | 0.49667300  |
| H | 1.76586800 | -2.25862600 | 1.47035000  |
| C | 4.55474600 | 2.88269500  | 0.11698500  |
| H | 5.37172300 | -2.07245200 | 1.39902200  |
| H | 5.49371400 | -2.12599800 | -0.37773700 |
| O | 6.65485200 | -0.71303200 | 0.61161700  |
| H | 4.34529500 | 3.67515100  | 0.83680700  |
| H | 4.84396900 | 3.32579500  | -0.84420900 |
| H | 5.37448400 | 2.25871900  | 0.49040100  |
| H | 6.71440200 | -0.13443400 | -0.16727600 |

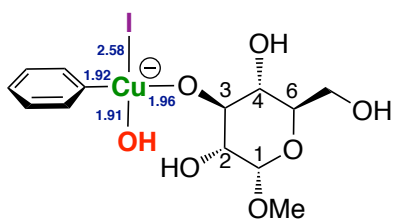

INT<sub>2-3</sub>\_anion

at M06-2X/6-31+G\*&SDD (for Cu & I)/SMD(water)

Energy = -1241.907201 A.U.

Thermal correction to Gibbs Free Energy =

0.266265 A.U.

Sum of electronic and thermal Free Energies =

-1241.640936 A.U.

at M06-2X/6-311+G\*&SDD (for Cu & I)/SMD(water)

Energy = -1242.1793275 A.U.

|   |             |            |             |
|---|-------------|------------|-------------|
| C | -3.27551400 | 1.65451600 | -0.79616200 |
| C | -2.87201200 | 0.94111700 | 0.32409600  |
| C | -3.53299000 | 1.02124900 | 1.54141000  |

|    |             |             |             |
|----|-------------|-------------|-------------|
| C  | -4.65400200 | 1.85402400  | 1.63321200  |
| C  | -5.08607000 | 2.58127500  | 0.52305900  |
| C  | -4.39807900 | 2.48243300  | -0.68732900 |
| H  | -2.73904500 | 1.57343500  | -1.73756100 |
| H  | -3.19577800 | 0.45431500  | 2.40447600  |
| H  | -5.18544500 | 1.93003600  | 2.57781900  |
| H  | -5.95738500 | 3.22457700  | 0.60092100  |
| H  | -4.73021100 | 3.04704500  | -1.55413300 |
| I  | -2.60446700 | -1.98965300 | -0.48929400 |
| O  | -0.39150400 | 1.67223000  | 0.79284800  |
| H  | -1.05843400 | 2.37486800  | 0.80539400  |
| Cu | -1.18210600 | 0.02697700  | 0.24666800  |
| O  | 0.50982900  | -0.95453600 | 0.14503300  |
| C  | 1.70726400  | -0.23993900 | 0.15540300  |
| C  | 1.99023400  | 0.48836600  | -1.16499200 |
| C  | 2.86204600  | -1.20815200 | 0.42159300  |
| H  | 1.72172700  | 0.50506600  | 0.97121800  |
| C  | 3.37330600  | 1.14578300  | -1.12961400 |
| H  | 2.01543100  | -0.25671000 | -1.97200700 |
| O  | 0.99775500  | 1.44470500  | -1.49100200 |
| C  | 4.19221500  | -0.46725200 | 0.43481200  |
| H  | 2.88402000  | -1.96460300 | -0.37970500 |
| O  | 2.67579300  | -1.84557300 | 1.67796700  |
| O  | 3.35356200  | 2.18802800  | -0.19168200 |
| H  | 3.64989600  | 1.53937000  | -2.11617600 |
| O  | 4.37082200  | 0.18751200  | -0.82646500 |
| H  | 0.50607100  | 1.67923000  | -0.65827600 |
| H  | 4.19327800  | 0.28081200  | 1.24093200  |
| C  | 5.38507100  | -1.38611800 | 0.60067900  |
| H  | 1.72355600  | -2.04922200 | 1.72774500  |
| C  | 4.56726100  | 2.92919600  | -0.16028000 |
| H  | 5.31047000  | -1.92359200 | 1.54825200  |
| H  | 5.40322300  | -2.11488600 | -0.22087600 |
| O  | 6.60229500  | -0.65056400 | 0.64117600  |
| H  | 4.39369500  | 3.79563200  | 0.47928400  |
| H  | 4.83608300  | 3.26442400  | -1.16984600 |
| H  | 5.38547800  | 2.32872000  | 0.25273400  |
| H  | 6.66041700  | -0.13266700 | -0.17932400 |

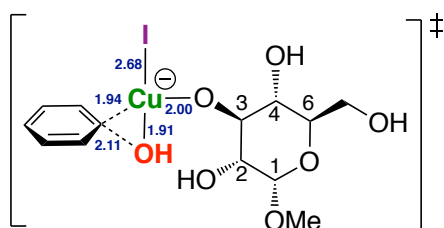

**TS<sub>RE-3</sub>\_anion**

at M06-2X/6-31+G\*&SDD (for Cu & I)/SMD(water)

Energy = -1241.896634 A.U.

Thermal correction to Gibbs Free Energy =

0.266038 A.U.

Sum of electronic and thermal Free Energies =

-1241.630596 A.U.

at M06-2X/6-311+G\*&SDD (for Cu & I)/SMD(water)

Energy = -1242.16847365 A.U.

|    |             |             |             |
|----|-------------|-------------|-------------|
| C  | -3.27779600 | 1.87462900  | -0.72277900 |
| C  | -2.57451700 | 1.35331700  | 0.35002300  |
| C  | -2.99866300 | 1.41763600  | 1.66588800  |
| C  | -4.24405500 | 2.00821000  | 1.90875700  |
| C  | -5.00244900 | 2.52359000  | 0.85668600  |
| C  | -4.51966200 | 2.45544000  | -0.45274800 |
| H  | -2.88748100 | 1.82223000  | -1.73460900 |
| H  | -2.39986100 | 1.01396200  | 2.47684400  |
| H  | -4.61322700 | 2.06272400  | 2.92896700  |
| H  | -5.96465800 | 2.98475500  | 1.05641400  |
| H  | -5.10528200 | 2.85876900  | -1.27406100 |
| I  | -2.78512000 | -2.03407200 | -0.34033300 |
| O  | -0.54707500 | 1.88132400  | 0.13382100  |
| H  | -0.21532800 | 1.89409600  | 1.04978300  |
| Cu | -1.16120100 | 0.08012000  | -0.03601400 |
| O  | 0.51117200  | -0.99177000 | -0.29165200 |
| C  | 1.70913200  | -0.30555900 | -0.11569200 |
| C  | 2.19547400  | 0.40556500  | -1.38310800 |
| C  | 2.80291600  | -1.27550900 | 0.33560900  |
| H  | 1.61662700  | 0.45941800  | 0.68136400  |
| C  | 3.55646500  | 1.06432200  | -1.13829600 |
| H  | 2.34160000  | -0.34365100 | -2.17263900 |
| O  | 1.26008700  | 1.35506800  | -1.86243200 |

|   |            |             |             |
|---|------------|-------------|-------------|
| C | 4.11946800 | -0.54056200 | 0.54675900  |
| H | 2.94269400 | -2.04067500 | -0.44552200 |
| O | 2.41541500 | -1.89847600 | 1.55276200  |
| O | 3.39039000 | 2.11172300  | -0.22009300 |
| H | 3.98612800 | 1.45239400  | -2.07071500 |
| O | 4.49135300 | 0.10591500  | -0.67669900 |
| H | 0.66973600 | 1.61614900  | -1.11543400 |
| H | 4.00197700 | 0.21296000  | 1.33921700  |
| C | 5.26949900 | -1.46227100 | 0.89660000  |
| H | 1.46217700 | -2.08093400 | 1.45243200  |
| C | 4.58700400 | 2.84603700  | 0.00849200  |
| H | 5.05339100 | -1.98785900 | 1.82910900  |
| H | 5.40352800 | -2.20141200 | 0.09528700  |
| O | 6.47210600 | -0.73142700 | 1.10599200  |
| H | 4.31729600 | 3.71093000  | 0.61603600  |
| H | 5.01609900 | 3.18399700  | -0.94303000 |
| H | 5.32526300 | 2.23959400  | 0.54495100  |
| H | 6.65104300 | -0.22304100 | 0.29694500  |

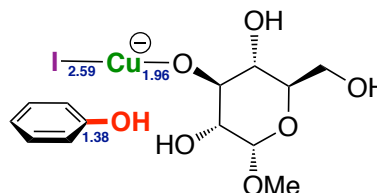

**INT<sub>3-3</sub>\_anion**

at M06-2X/6-31+G\*&SDD (for Cu & I)/SMD(water)

Energy = -1242.0055220000002 A.U.

Thermal correction to Gibbs Free Energy =

0.265458 A.U.

Sum of electronic and thermal Free Energies =

-1241.740064 A.U.

at M06-2X/6-311+G\*&SDD (for Cu & I)/SMD(water)

Energy = -1242.27662899 A.U.

|   |             |            |             |
|---|-------------|------------|-------------|
| C | -2.18052000 | 2.59231600 | -0.37144700 |
| C | -1.69923800 | 2.02859800 | 0.80972900  |
| C | -2.55646800 | 1.75065600 | 1.87335200  |
| C | -3.91522400 | 2.03658100 | 1.74424200  |

|    |             |             |             |
|----|-------------|-------------|-------------|
| C  | -4.41428900 | 2.59660600  | 0.56762600  |
| C  | -3.54063200 | 2.87260100  | -0.48645300 |
| H  | -1.49006300 | 2.79380900  | -1.18577900 |
| H  | -2.16032300 | 1.30755900  | 2.78369100  |
| H  | -4.58523300 | 1.81407100  | 2.56964800  |
| H  | -5.47355800 | 2.81327000  | 0.47113300  |
| H  | -3.91874500 | 3.30471800  | -1.40839700 |
| I  | -3.42402300 | -1.37025900 | -0.54749900 |
| O  | -0.35085500 | 1.76749300  | 0.87769100  |
| H  | -0.15365900 | 1.21457600  | 1.65495600  |
| Cu | -0.92395900 | -1.31651500 | 0.14567900  |
| O  | 0.91794900  | -1.67956600 | 0.72432900  |
| C  | 1.88273800  | -0.72879000 | 0.39739200  |
| C  | 1.82689100  | -0.25325200 | -1.06013500 |
| C  | 3.27969000  | -1.30091400 | 0.65118100  |
| H  | 1.79254500  | 0.16660900  | 1.04470800  |
| C  | 2.97205100  | 0.72173100  | -1.35162700 |
| H  | 1.95628600  | -1.11907100 | -1.72073300 |
| O  | 0.58033100  | 0.32963100  | -1.40106900 |
| C  | 4.34842100  | -0.26170700 | 0.34206600  |
| H  | 3.43135800  | -2.17486700 | -0.00348100 |
| O  | 3.39004200  | -1.69688100 | 2.01202500  |
| O  | 2.74289300  | 1.89795200  | -0.62283500 |
| H  | 3.03599000  | 0.95325900  | -2.42231700 |
| O  | 4.22005300  | 0.13771800  | -1.02820000 |
| H  | 0.30252200  | 0.91262700  | -0.66456700 |
| H  | 4.21534300  | 0.61417700  | 0.99378500  |
| C  | 5.76056900  | -0.78841500 | 0.49136000  |
| H  | 2.52557400  | -2.09272400 | 2.23108900  |
| C  | 3.70387500  | 2.91351500  | -0.88531400 |
| H  | 5.92718700  | -1.11745500 | 1.51915200  |
| H  | 5.90672100  | -1.64253000 | -0.18350300 |
| O  | 6.72106700  | 0.22698300  | 0.22481800  |
| H  | 3.35551600  | 3.81654600  | -0.38226000 |
| H  | 3.77973300  | 3.09843200  | -1.96400400 |
| H  | 4.68841700  | 2.63433800  | -0.49386800 |
| H  | 6.55338100  | 0.56151900  | -0.67237300 |

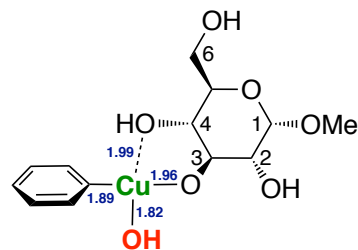

INT<sub>3-3</sub>-1

at M06-2X/6-31+G\*&SDD (for Cu)/SMD(water)

Energy = -1230.332157 A.U.

Thermal correction to Gibbs Free Energy =

0.270863 A.U.

Sum of electronic and thermal Free Energies =

-1230.061294 A.U.

at M06-2X/6-311+G\*&SDD (for Cu)/SMD(water)

Energy = -1230.60334915 A.U.

|    |             |             |             |
|----|-------------|-------------|-------------|
| C  | 3.69641800  | 0.46151300  | -1.01997900 |
| C  | 3.07847400  | -0.06204000 | 0.10322900  |
| C  | 3.48338100  | 0.19904600  | 1.40191600  |
| C  | 4.57430400  | 1.05730200  | 1.58027300  |
| C  | 5.21930700  | 1.61339000  | 0.47440000  |
| C  | 4.78512900  | 1.31871900  | -0.81863300 |
| H  | 3.35397600  | 0.22086400  | -2.02226000 |
| H  | 2.97510900  | -0.24102100 | 2.25514900  |
| H  | 4.91467500  | 1.28564100  | 2.58619000  |
| H  | 6.06628500  | 2.27672000  | 0.62123300  |
| H  | 5.28999900  | 1.75032700  | -1.67802600 |
| O  | 2.54862400  | -2.53279200 | -0.24039500 |
| H  | 3.49205100  | -2.32525100 | -0.16730900 |
| Cu | 1.48506500  | -1.05893400 | -0.11847100 |
| O  | -0.22698800 | -1.97667200 | -0.37936600 |
| C  | -1.23696200 | -1.08123400 | -0.01885600 |
| C  | -2.60917500 | -1.46909300 | -0.57398600 |
| C  | -0.89520300 | 0.31261300  | -0.53426100 |
| H  | -1.32851500 | -1.00732100 | 1.08246900  |
| C  | -3.64141700 | -0.37535800 | -0.27542900 |
| H  | -2.53478700 | -1.57796000 | -1.66121400 |
| O  | -3.05423700 | -2.71971900 | -0.07998400 |

|   |             |             |             |
|---|-------------|-------------|-------------|
| C | -1.95976800 | 1.33016700  | -0.14558100 |
| H | -0.78278000 | 0.28755800  | -1.62588100 |
| O | 0.39740300  | 0.60135700  | 0.05241400  |
| O | -3.87879800 | -0.38020800 | 1.10558800  |
| H | -4.57651000 | -0.55590700 | -0.81944500 |
| O | -3.19190900 | 0.88686300  | -0.72755700 |
| H | -3.16811300 | -2.63681500 | 0.88298900  |
| H | -2.05857800 | 1.37809300  | 0.94771200  |
| C | -1.71871800 | 2.72043100  | -0.69955200 |
| H | 0.83184400  | 1.33568400  | -0.42012500 |
| C | -4.91242400 | 0.51723600  | 1.49767500  |
| H | -0.77690600 | 3.11786100  | -0.31220000 |
| H | -1.66010900 | 2.67251200  | -1.79500700 |
| O | -2.74004400 | 3.61896000  | -0.29061400 |
| H | -5.10309200 | 0.33673300  | 2.55611500  |
| H | -5.82383900 | 0.32348300  | 0.91923800  |
| H | -4.60228900 | 1.55786900  | 1.35360900  |
| H | -3.58781600 | 3.27156800  | -0.61556900 |

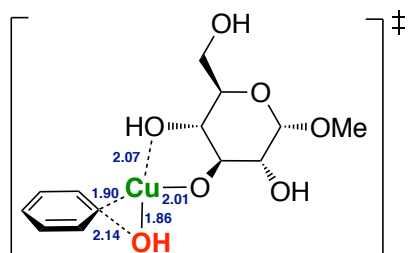

$TS_{RE-3_-I}$

at M06-2X/6-31+G\*&SDD (for Cu)/SMD(water)

Energy = -1230.3269360000002 A.U.

Thermal correction to Gibbs Free Energy =

0.269557 A.U.

Sum of electronic and thermal Free Energies =

-1230.057379 A.U.

at M06-2X/6-311+G\*&SDD (for Cu)/SMD(water)

Energy = -1230.59849575 A.U.

|   |            |             |             |
|---|------------|-------------|-------------|
| C | 3.68442600 | 0.39228000  | -1.06403500 |
| C | 3.20239400 | -0.20909900 | 0.08598500  |
| C | 3.61637500 | 0.10311700  | 1.36931300  |

|    |             |             |             |
|----|-------------|-------------|-------------|
| C  | 4.57348200  | 1.11593000  | 1.50137500  |
| C  | 5.07960700  | 1.76196800  | 0.37309300  |
| C  | 4.63558700  | 1.40414400  | -0.90201700 |
| H  | 3.34140400  | 0.09011300  | -2.04889000 |
| H  | 3.21288900  | -0.40835200 | 2.23826200  |
| H  | 4.91700600  | 1.39353900  | 2.49368600  |
| H  | 5.82536700  | 2.54262500  | 0.48638300  |
| H  | 5.03216900  | 1.90473700  | -1.78050100 |
| O  | 2.90713000  | -2.30124400 | -0.25591100 |
| H  | 3.25237600  | -2.52009900 | 0.62581600  |
| Cu | 1.51971700  | -1.07655000 | -0.06030900 |
| O  | -0.24152200 | -1.98666000 | -0.37159100 |
| C  | -1.25277800 | -1.09302200 | -0.02153200 |
| C  | -2.61231600 | -1.46575900 | -0.62090400 |
| C  | -0.90380700 | 0.32015300  | -0.49033900 |
| H  | -1.37771300 | -1.04235000 | 1.07925400  |
| C  | -3.66146900 | -0.38868800 | -0.32644000 |
| H  | -2.50874000 | -1.54804400 | -1.70837100 |
| O  | -3.06592500 | -2.73155300 | -0.17129600 |
| C  | -1.99322000 | 1.31564900  | -0.10960800 |
| H  | -0.76565600 | 0.32040800  | -1.58023000 |
| O  | 0.35652300  | 0.62252800  | 0.13715700  |
| O  | -3.93925500 | -0.42710200 | 1.04738400  |
| H  | -4.58034900 | -0.56265900 | -0.89971000 |
| O  | -3.20867000 | 0.88656300  | -0.73558100 |
| H  | -3.18924400 | -2.67771800 | 0.79255300  |
| H  | -2.12349500 | 1.33237000  | 0.98170800  |
| C  | -1.74728700 | 2.72395600  | -0.61306000 |
| H  | 0.79964700  | 1.35422600  | -0.32827700 |
| C  | -4.98667500 | 0.45748400  | 1.43078300  |
| H  | -0.82131200 | 3.11682100  | -0.18537600 |
| H  | -1.65582300 | 2.71123700  | -1.70741000 |
| O  | -2.78894700 | 3.60171300  | -0.20784000 |
| H  | -5.20922500 | 0.24908800  | 2.47788600  |
| H  | -5.87981000 | 0.27747600  | 0.82016500  |
| H  | -4.67552500 | 1.50235000  | 1.32372300  |
| H  | -3.62634700 | 3.24153400  | -0.54595300 |

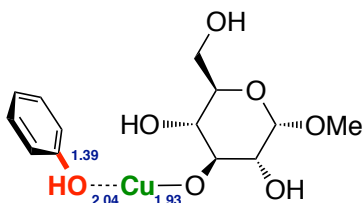

INT<sub>4-3\_-1</sub>

at M06-2X/6-31+G\*&SDD (for Cu)/SMD(water)

Energy = -1230.429318 A.U.

Thermal correction to Gibbs Free Energy =

0.272501 A.U.

Sum of electronic and thermal Free Energies =

-1230.156817 A.U.

at M06-2X/6-311+G\*&SDD (for Cu)/SMD(water)

Energy = -1230.70061611 A.U.

|    |             |             |             |
|----|-------------|-------------|-------------|
| C  | 2.77352100  | 0.55073000  | -1.23170000 |
| C  | 3.39109900  | -0.15456300 | -0.20141300 |
| C  | 3.99135400  | 0.49817100  | 0.87127000  |
| C  | 3.95745000  | 1.89295900  | 0.91382100  |
| C  | 3.33392600  | 2.61918900  | -0.10139200 |
| C  | 2.74705700  | 1.94338000  | -1.17407300 |
| H  | 2.31181000  | 0.00683800  | -2.05103400 |
| H  | 4.46138300  | -0.07846700 | 1.66352200  |
| H  | 4.41781200  | 2.40891300  | 1.75098800  |
| H  | 3.30549800  | 3.70341100  | -0.05823400 |
| H  | 2.26124200  | 2.49973400  | -1.97016000 |
| O  | 3.34961500  | -1.54234500 | -0.27506700 |
| H  | 3.90341800  | -1.93625900 | 0.42323000  |
| Cu | 1.42090300  | -2.15361700 | -0.00952500 |
| O  | -0.47614200 | -2.39999500 | 0.27247400  |
| C  | -1.28463200 | -1.26652700 | 0.38750700  |
| C  | -2.43190000 | -1.31842600 | -0.63380800 |
| C  | -0.52497400 | 0.05508500  | 0.20171100  |
| H  | -1.74204300 | -1.22229500 | 1.39681000  |
| C  | -3.28704500 | -0.05321600 | -0.62085900 |
| H  | -1.99923800 | -1.41618400 | -1.63585800 |
| O  | -3.25139100 | -2.46337000 | -0.44873400 |
| C  | -1.47284800 | 1.25602700  | 0.19720400  |

|   |             |             |             |
|---|-------------|-------------|-------------|
| H | 0.01567900  | 0.01229300  | -0.75821400 |
| O | 0.40404500  | 0.18574200  | 1.27527300  |
| O | -3.98153300 | -0.01525300 | 0.59799100  |
| H | -3.99859100 | -0.04337500 | -1.45617700 |
| O | -2.47963700 | 1.08954300  | -0.80651800 |
| H | -3.66756200 | -2.39255200 | 0.42809700  |
| H | -1.95011600 | 1.34518100  | 1.18390200  |
| C | -0.77329800 | 2.55776900  | -0.14147100 |
| H | 1.17278000  | 0.69863600  | 0.97381300  |
| C | -4.88647800 | 1.07887900  | 0.69266300  |
| H | 0.03146000  | 2.74928100  | 0.57290900  |
| H | -0.34300300 | 2.48800400  | -1.15022900 |
| O | -1.66538100 | 3.66236300  | -0.05586600 |
| H | -5.46300200 | 0.93466600  | 1.60720200  |
| H | -5.56171600 | 1.09123100  | -0.17165800 |
| H | -4.34636800 | 2.03053200  | 0.74715800  |
| H | -2.41163000 | 3.48507500  | -0.65301900 |

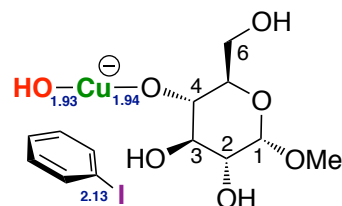

INT<sub>1-4\_anion</sub>

at M06-2X/6-31+G\*&SDD (for Cu & I)/SMD(water)

Energy = -1241.935504 A.U.

Thermal correction to Gibbs Free Energy =

0.261503 A.U.

Sum of electronic and thermal Free Energies =

-1241.674001 A.U.

at M06-2X/6-311+G\*&SDD (for Cu & I)/SMD(water)

Energy = -1242.20864754 A.U.

|   |             |            |             |
|---|-------------|------------|-------------|
| C | -1.62852400 | 1.49314200 | -0.44986700 |
| C | -2.75572900 | 0.93172900 | 0.14475400  |
| C | -3.35035900 | 1.51067200 | 1.26381300  |
| C | -2.78989400 | 2.67178300 | 1.80213800  |
| C | -1.65583500 | 3.24350800 | 1.22386800  |

|    |             |             |             |
|----|-------------|-------------|-------------|
| C  | -1.08009800 | 2.65485900  | 0.09776000  |
| H  | -1.17039400 | 1.02695900  | -1.31736200 |
| H  | -4.22596300 | 1.06134000  | 1.72164200  |
| H  | -3.24370800 | 3.12382900  | 2.67920200  |
| H  | -1.22263400 | 4.14295300  | 1.65056900  |
| H  | -0.19410200 | 3.09042200  | -0.35856700 |
| I  | -3.53868300 | -0.88242900 | -0.63885500 |
| O  | -0.95251900 | -0.61550000 | 2.58046900  |
| H  | -1.51916700 | 0.15336500  | 2.41115100  |
| Cu | -0.19272600 | -1.07641900 | 0.86888300  |
| O  | 0.60659600  | -1.62010200 | -0.81492300 |
| C  | 1.82303600  | -1.01113800 | -1.12115800 |
| C  | 2.84579900  | -1.15635000 | 0.02116100  |
| H  | 2.27100900  | -1.47594200 | -2.02191200 |
| C  | 1.65675600  | 0.48173100  | -1.41713000 |
| O  | 4.07911200  | -0.49285600 | -0.29156700 |
| H  | 2.41564700  | -0.71098600 | 0.93435400  |
| C  | 3.19085900  | -2.60505600 | 0.29482500  |
| C  | 2.99371900  | 1.18024000  | -1.63898000 |
| H  | 1.15008400  | 0.93787000  | -0.54979800 |
| O  | 0.83850400  | 0.62398900  | -2.57276700 |
| C  | 3.95065300  | 0.89697800  | -0.48529400 |
| H  | 2.26800700  | -3.17074900 | 0.45764000  |
| H  | 3.71770900  | -3.02808800 | -0.56658200 |
| O  | 4.06878600  | -2.74887700 | 1.40866800  |
| H  | 3.45091800  | 0.79707100  | -2.55684100 |
| O  | 2.81951900  | 2.57600500  | -1.83622000 |
| H  | 0.68760700  | 1.57383900  | -2.71530600 |
| O  | 3.44741900  | 1.55076900  | 0.65128000  |
| H  | 4.96299300  | 1.25781800  | -0.70586900 |
| H  | 3.59956700  | -2.44620300 | 2.20364100  |
| H  | 2.46403400  | 2.95014200  | -1.01040000 |
| C  | 4.29319600  | 1.42519100  | 1.78909900  |
| H  | 4.30230300  | 0.39368500  | 2.15799600  |
| H  | 5.31618400  | 1.73285700  | 1.54009300  |
| H  | 3.88833100  | 2.08354200  | 2.55862600  |

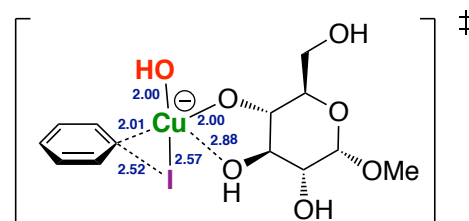

TS<sub>OA-4</sub><sub>anion</sub>

at M06-2X/6-31+G\*&SDD (for Cu & I)/SMD(water)

Energy = -1241.894113 A.U.

Thermal correction to Gibbs Free Energy =

0.264643 A.U.

Sum of electronic and thermal Free Energies =

-1241.62947 A.U.

at M06-2X/6-311+G\*&SDD (for Cu & I)/SMD(water)

Energy = -1242.16759729 A.U.

|    |             |             |             |
|----|-------------|-------------|-------------|
| C  | -3.21792100 | 1.48737000  | -0.46779600 |
| C  | -3.06035400 | 0.26927000  | 0.19040200  |
| C  | -4.03290800 | -0.24342100 | 1.04565100  |
| C  | -5.18333800 | 0.51531300  | 1.27425700  |
| C  | -5.35752600 | 1.74813500  | 0.64230700  |
| C  | -4.37547400 | 2.23016200  | -0.22512800 |
| H  | -2.45589400 | 1.85574300  | -1.14801700 |
| H  | -3.89802900 | -1.20483500 | 1.53142100  |
| H  | -5.94539700 | 0.13329000  | 1.94775700  |
| H  | -6.25829800 | 2.32756500  | 0.81979600  |
| H  | -4.50643200 | 3.18650700  | -0.72370700 |
| I  | -1.86779800 | -1.47014700 | -1.18358100 |
| O  | -1.36669900 | 1.29431200  | 2.31428700  |
| H  | -2.28496200 | 1.60404400  | 2.28557800  |
| Cu | -1.17136900 | -0.01501800 | 0.81477900  |
| O  | 0.74404800  | -0.45268100 | 1.20281800  |
| C  | 1.65241900  | -0.30496300 | 0.16316000  |
| C  | 3.04096400  | -0.80953100 | 0.59576200  |
| H  | 1.35752900  | -0.88947400 | -0.73534000 |
| C  | 1.79530500  | 1.15535700  | -0.28629800 |
| O  | 4.01677800  | -0.62662000 | -0.44089000 |
| H  | 3.35771500  | -0.25133500 | 1.49105500  |
| C  | 3.03137500  | -2.29046400 | 0.91429000  |



|   |            |             |             |
|---|------------|-------------|-------------|
| C | 2.90176900 | 1.31611100  | -1.32422300 |
| H | 2.03274200 | 1.76628200  | 0.59887300  |
| O | 0.55389700 | 1.58963200  | -0.83739700 |
| C | 4.21056500 | 0.71508700  | -0.82196100 |
| H | 2.23500500 | -2.50116800 | 1.63402400  |
| H | 2.84138800 | -2.86164400 | -0.00017600 |
| O | 4.28875700 | -2.74214100 | 1.41218300  |
| H | 2.61441200 | 0.78047800  | -2.23490700 |
| O | 3.07062100 | 2.67460000  | -1.70261300 |
| H | 0.65455700 | 2.52001000  | -1.09964500 |
| O | 4.65940900 | 1.51392200  | 0.24251600  |
| H | 4.96919300 | 0.68904100  | -1.61431200 |
| H | 4.44649300 | -2.31309400 | 2.26941700  |
| H | 3.41448100 | 3.15778000  | -0.93059000 |
| C | 5.91744500 | 1.09956300  | 0.76252600  |
| H | 5.82836300 | 0.14121600  | 1.28571800  |
| H | 6.65315000 | 1.00728900  | -0.04581000 |
| H | 6.23860300 | 1.86952600  | 1.46512200  |

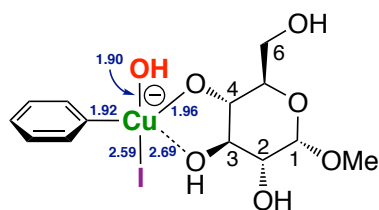

INT<sub>2-4</sub>\_anion

at M06-2X/6-31+G\*&SDD (for Cu & I)/SMD(water)

Energy = -1241.900418 A.U.

Thermal correction to Gibbs Free Energy =

0.264 A.U.

Sum of electronic and thermal Free Energies =

-1241.636418 A.U.

at M06-2X/6-311+G\*&SDD (for Cu & I)/SMD(water)

Energy = -1242.17236900 A.U.

|   |            |             |             |
|---|------------|-------------|-------------|
| C | 3.16869400 | -1.66023500 | -0.44034000 |
| C | 2.96606300 | -0.64119500 | 0.48073000  |
| C | 3.98147300 | -0.16608300 | 1.29989400  |
| C | 5.25465000 | -0.73400500 | 1.18175400  |

|    |             |             |             |
|----|-------------|-------------|-------------|
| C  | 5.48831400  | -1.75584600 | 0.26012700  |
| C  | 4.44777100  | -2.21753500 | -0.54731500 |
| H  | 2.35880700  | -2.01822100 | -1.07028300 |
| H  | 3.79909700  | 0.62991200  | 2.01635900  |
| H  | 6.06088000  | -0.37216900 | 1.81397900  |
| H  | 6.47888600  | -2.19190300 | 0.17203200  |
| H  | 4.62376000  | -3.01377600 | -1.26536500 |
| I  | 1.73064400  | 1.75679600  | -1.01634000 |
| O  | 1.07488600  | -1.35723000 | 2.12584700  |
| H  | 1.92816000  | -1.80477300 | 2.22319700  |
| Cu | 1.16378000  | -0.03868300 | 0.76554500  |
| O  | -0.67818400 | 0.54652800  | 1.11964400  |
| C  | -1.60172000 | 0.33896900  | 0.10029700  |
| C  | -3.00630500 | 0.75985900  | 0.56195200  |
| H  | -1.36188100 | 0.93855400  | -0.80255000 |
| C  | -1.65514500 | -1.12840100 | -0.33919700 |
| O  | -3.97971100 | 0.51563000  | -0.46314100 |
| H  | -3.27696400 | 0.18607300  | 1.46218500  |
| C  | -3.07550500 | 2.24080500  | 0.87360800  |
| C  | -2.76434600 | -1.36471800 | -1.35934700 |
| H  | -1.83243700 | -1.75180200 | 0.55058700  |
| O  | -0.39051400 | -1.46318700 | -0.90595700 |
| C  | -4.09888700 | -0.83625100 | -0.84059000 |
| H  | -2.28998400 | 2.49756200  | 1.59065100  |
| H  | -2.91615100 | 2.81578000  | -0.04433900 |
| O  | -4.35391700 | 2.62812300  | 1.36973200  |
| H  | -2.52147400 | -0.81933500 | -2.27711200 |
| O  | -2.86267300 | -2.73232100 | -1.72616600 |
| H  | -0.35269300 | -2.42618400 | -1.02523800 |
| O  | -4.48816400 | -1.65679300 | 0.23039000  |
| H  | -4.86720100 | -0.85509200 | -1.62367200 |
| H  | -4.48907400 | 2.19525800  | 2.22865500  |
| H  | -3.16099300 | -3.22870500 | -0.94385700 |
| C  | -5.76437800 | -1.31679600 | 0.76037700  |
| H  | -5.72806600 | -0.35431000 | 1.28223100  |
| H  | -6.51026000 | -1.26894100 | -0.04246500 |
| H  | -6.03399300 | -2.10374500 | 1.46574700  |

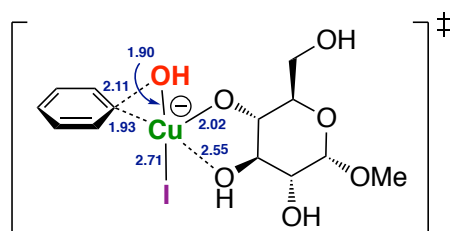

**TS<sub>RE-4</sub>\_anion**

at M06-2X/6-31+G\*&SDD (for Cu & I)/SMD(water)

Energy = -1241.891094 A.U.

Thermal correction to Gibbs Free Energy =

0.263124 A.U.

Sum of electronic and thermal Free Energies =

-1241.62797 A.U.

at M06-2X/6-311+G\*&SDD (for Cu & I)/SMD(water)

Energy = -1242.16290203 A.U.

|    |             |             |             |
|----|-------------|-------------|-------------|
| C  | 2.99679400  | -1.90568500 | -0.37934500 |
| C  | 2.80923600  | -1.02023000 | 0.67012600  |
| C  | 3.84251300  | -0.50759300 | 1.43938500  |
| C  | 5.14767900  | -0.87691700 | 1.09926200  |
| C  | 5.38368100  | -1.74424400 | 0.03127800  |
| C  | 4.31098900  | -2.25505500 | -0.70285300 |
| H  | 2.15664000  | -2.30725400 | -0.93780800 |
| H  | 3.65009400  | 0.17317200  | 2.26353900  |
| H  | 5.97763000  | -0.47787600 | 1.67562100  |
| H  | 6.40012500  | -2.02748000 | -0.22373900 |
| H  | 4.48891400  | -2.93571600 | -1.53060800 |
| I  | 1.89485600  | 1.92286500  | -0.88551600 |
| O  | 1.17558200  | -1.64229100 | 1.85867200  |
| H  | 1.67912400  | -1.44398900 | 2.66466800  |
| Cu | 1.11376200  | -0.10622400 | 0.73821500  |
| O  | -0.73959000 | 0.59605000  | 1.13224300  |
| C  | -1.64562300 | 0.39447000  | 0.09789400  |
| C  | -3.06833000 | 0.78508900  | 0.52875000  |
| H  | -1.39747400 | 1.00894200  | -0.79504500 |
| C  | -1.65559500 | -1.06675500 | -0.36660800 |
| O  | -4.02164400 | 0.51231600  | -0.50927900 |
| H  | -3.34069200 | 0.21235400  | 1.42927800  |
| C  | -3.17575200 | 2.26660700  | 0.82543000  |

|   |             |             |             |
|---|-------------|-------------|-------------|
| C | -2.74673300 | -1.33203000 | -1.39748900 |
| H | -1.81457200 | -1.70908900 | 0.51259800  |
| O | -0.37185400 | -1.34287800 | -0.92586400 |
| C | -4.09885500 | -0.84266600 | -0.88554000 |
| H | -2.40328300 | 2.54894800  | 1.54722300  |
| H | -3.02030000 | 2.83546200  | -0.09698100 |
| O | -4.46759700 | 2.63108800  | 1.30440700  |
| H | -2.51342600 | -0.77750600 | -2.31212300 |
| O | -2.80604600 | -2.70094400 | -1.76868500 |
| H | -0.24204200 | -2.30441900 | -0.95483700 |
| O | -4.46822000 | -1.67326700 | 0.18529200  |
| H | -4.86284100 | -0.88605900 | -1.67189600 |
| H | -4.60408200 | 2.20110300  | 2.16451900  |
| H | -3.09068000 | -3.20781500 | -0.98805400 |
| C | -5.75638100 | -1.37102800 | 0.70906000  |
| H | -5.75425600 | -0.40205600 | 1.22012600  |
| H | -6.50168200 | -1.35776600 | -0.09563700 |
| H | -6.00045700 | -2.15869600 | 1.42289900  |

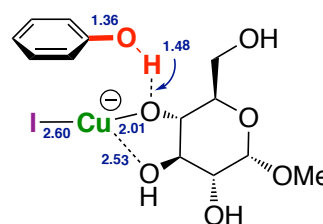

**INT<sub>3-4</sub>\_anion**

at M06-2X/6-31+G\*&SDD (for Cu & I)/SMD(water)

Energy = -1242.012751 A.U.

Thermal correction to Gibbs Free Energy =

0.262923 A.U.

Sum of electronic and thermal Free Energies =

-1241.749828 A.U.

at M06-2X/6-311+G\*&SDD (for Cu & I)/SMD(water)

Energy = -1242.28312352 A.U.

|   |             |            |             |
|---|-------------|------------|-------------|
| C | -1.79999100 | 2.40770100 | -1.94774100 |
| C | -1.09859600 | 2.26755700 | -0.74428100 |
| C | -1.76936100 | 2.46289600 | 0.47255300  |
| C | -3.12844300 | 2.77395200 | 0.47652400  |

|    |             |             |             |
|----|-------------|-------------|-------------|
| C  | -3.83174300 | 2.90646000  | -0.72220100 |
| C  | -3.15732200 | 2.72631200  | -1.93189300 |
| H  | -1.27251400 | 2.25487700  | -2.88534400 |
| H  | -1.21941100 | 2.36493500  | 1.40524400  |
| H  | -3.63950200 | 2.91325200  | 1.42534300  |
| H  | -4.89019100 | 3.14785000  | -0.71436000 |
| H  | -3.69145400 | 2.82811700  | -2.87266600 |
| I  | -3.45593500 | -1.45119200 | 0.16858900  |
| O  | 0.22567600  | 1.95136600  | -0.78112400 |
| H  | 0.45735600  | 1.34474900  | 0.04101400  |
| Cu | -1.06512600 | -0.57352200 | 0.68989100  |
| O  | 0.64110400  | 0.38272600  | 1.14977000  |
| C  | 1.80762100  | -0.36846200 | 0.97838700  |
| C  | 3.03423300  | 0.55455200  | 0.91394600  |
| H  | 1.95332500  | -1.06352000 | 1.82694600  |
| C  | 1.75948000  | -1.21274700 | -0.29853800 |
| O  | 4.23259600  | -0.19842400 | 0.68779900  |
| H  | 2.89721700  | 1.27346100  | 0.09023700  |
| C  | 3.24045500  | 1.31672200  | 2.20721900  |
| C  | 3.08742500  | -1.91820600 | -0.55475400 |
| H  | 1.52782500  | -0.54938300 | -1.14560300 |
| O  | 0.71220000  | -2.16718500 | -0.14860000 |
| C  | 4.24140900  | -0.91909200 | -0.52332000 |
| H  | 2.31462300  | 1.83587100  | 2.47434900  |
| H  | 3.49681500  | 0.61706700  | 3.00900600  |
| O  | 4.32405700  | 2.23700400  | 2.11865800  |
| H  | 3.25734800  | -2.65460700 | 0.23719600  |
| O  | 3.07004800  | -2.64309300 | -1.77427000 |
| H  | 0.51847600  | -2.55300900 | -1.01838700 |
| O  | 4.10306300  | -0.08155600 | -1.64150900 |
| H  | 5.21249600  | -1.42846800 | -0.55453300 |
| H  | 4.08947400  | 2.91838700  | 1.46738700  |
| H  | 2.99503800  | -2.00086000 | -2.50218800 |
| C  | 5.16288500  | 0.85963000  | -1.77000700 |
| H  | 5.12088600  | 1.60755500  | -0.97061800 |
| H  | 6.13258000  | 0.34808400  | -1.74087100 |
| H  | 5.03458900  | 1.35060000  | -2.73535900 |

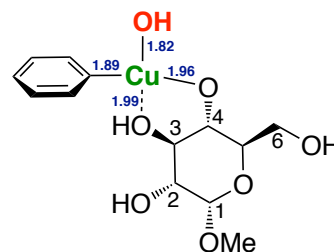

INT<sub>3-4</sub>-I

at M06-2X/6-31+G\*&SDD (for Cu)/SMD(water)

Energy = -1230.3332859999998 A.U.

Thermal correction to Gibbs Free Energy =

0.272008 A.U.

Sum of electronic and thermal Free Energies =

-1230.061278 A.U.

at M06-2X/6-311+G\*&SDD (for Cu)/SMD(water)

Energy = -1230.60446116 A.U.

|    |             |             |             |
|----|-------------|-------------|-------------|
| C  | -3.59107800 | 0.57747200  | 1.18573000  |
| C  | -3.15203700 | -0.16230600 | 0.10018300  |
| C  | -3.84607100 | -0.27359600 | -1.09299800 |
| C  | -5.05800300 | 0.41781400  | -1.20333000 |
| C  | -5.53286200 | 1.18006200  | -0.13484400 |
| C  | -4.80579200 | 1.26116100  | 1.05355200  |
| H  | -3.01845500 | 0.63058300  | 2.10724600  |
| H  | -3.46870800 | -0.87312000 | -1.91637200 |
| H  | -5.62635900 | 0.35442600  | -2.12677400 |
| H  | -6.47543400 | 1.71093900  | -0.22799400 |
| H  | -5.17773800 | 1.85372100  | 1.88445100  |
| O  | -2.26183300 | -2.45531000 | 0.72334800  |
| H  | -3.22464700 | -2.36326400 | 0.77534600  |
| Cu | -1.42232200 | -0.92420100 | 0.19514000  |
| O  | 0.40548700  | -1.63389300 | 0.29553100  |
| C  | 1.22878500  | -0.74663300 | -0.40002600 |
| C  | 2.71672700  | -0.88893000 | -0.05996000 |
| H  | 1.13471100  | -0.87766100 | -1.49610100 |
| C  | 0.81783500  | 0.68300100  | -0.07328100 |
| O  | 3.46506500  | 0.08477000  | -0.80397000 |
| H  | 2.86777800  | -0.72397000 | 1.01800900  |
| C  | 3.26065200  | -2.24882500 | -0.44391900 |

|   |             |             |             |
|---|-------------|-------------|-------------|
| C | 1.65153300  | 1.70453500  | -0.82314400 |
| H | 0.89204400  | 0.84620800  | 1.00936800  |
| O | -0.57943400 | 0.76012200  | -0.44137400 |
| C | 3.13235300  | 1.42689800  | -0.53099800 |
| H | 2.64986100  | -3.02606900 | 0.02716700  |
| H | 3.20834700  | -2.37053300 | -1.53033600 |
| O | 4.63076500  | -2.40167000 | -0.08984600 |
| H | 1.48600200  | 1.59467800  | -1.89892300 |
| O | 1.30345600  | 3.03682500  | -0.49378000 |
| H | -0.98620100 | 1.55499100  | -0.04909100 |
| O | 3.35265200  | 1.76541100  | 0.81262900  |
| H | 3.77968700  | 2.02600600  | -1.18256000 |
| H | 4.69770000  | -2.40945400 | 0.87900400  |
| H | 1.55142000  | 3.19119200  | 0.43536900  |
| C | 4.71805100  | 1.65663600  | 1.20214500  |
| H | 5.03929400  | 0.60962300  | 1.21093200  |
| H | 5.35571800  | 2.23001700  | 0.51858300  |
| H | 4.79251900  | 2.06974100  | 2.20865000  |

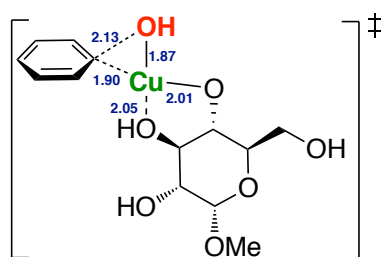

TS<sub>RE-4\_-I</sub>

at M06-2X/6-31+G\*&SDD (for Cu)/SMD(water)

Energy = -1230.327584 A.U.

Thermal correction to Gibbs Free Energy =

0.270564 A.U.

Sum of electronic and thermal Free Energies =

-1230.05702 A.U.

at M06-2X/6-311+G\*&SDD (for Cu)/SMD(water)

Energy = -1230.59914157 A.U.

|   |             |             |             |
|---|-------------|-------------|-------------|
| C | -3.60924000 | 0.53549500  | 1.18836300  |
| C | -3.23104800 | -0.32129400 | 0.16863200  |
| C | -3.86678100 | -0.41316600 | -1.05761700 |

|    |             |             |             |
|----|-------------|-------------|-------------|
| C  | -4.94683700 | 0.44597600  | -1.28066000 |
| C  | -5.36201400 | 1.33516200  | -0.28681000 |
| C  | -4.69783800 | 1.37948100  | 0.93952000  |
| H  | -3.08285500 | 0.55818900  | 2.13800500  |
| H  | -3.54152800 | -1.12164700 | -1.81331300 |
| H  | -5.46553600 | 0.40887300  | -2.23415100 |
| H  | -6.20803300 | 1.99084900  | -0.46747500 |
| H  | -5.01957800 | 2.07030500  | 1.71341300  |
| O  | -2.64338000 | -2.25355800 | 0.83301800  |
| H  | -2.88061000 | -2.03761100 | 1.75038400  |
| Cu | -1.44501900 | -0.96310300 | 0.21783900  |
| O  | 0.43360600  | -1.66825700 | 0.25946400  |
| C  | 1.23910000  | -0.75652400 | -0.42111300 |
| C  | 2.73100000  | -0.89481900 | -0.09139900 |
| H  | 1.14435100  | -0.86857000 | -1.52074400 |
| C  | 0.81911800  | 0.67164200  | -0.07947700 |
| O  | 3.48130200  | 0.09727100  | -0.80973900 |
| H  | 2.88388000  | -0.75713200 | 0.99049200  |
| C  | 3.28173600  | -2.24193200 | -0.51004400 |
| C  | 1.66481700  | 1.70601100  | -0.80040500 |
| H  | 0.88831700  | 0.81649200  | 1.00708100  |
| O  | -0.56696400 | 0.76645500  | -0.46009800 |
| C  | 3.14300300  | 1.43073200  | -0.50542800 |
| H  | 2.67794800  | -3.03480800 | -0.05674200 |
| H  | 3.22682000  | -2.33694200 | -1.59913400 |
| O  | 4.65461700  | -2.39674500 | -0.16516200 |
| H  | 1.50816700  | 1.61734500  | -1.87968000 |
| O  | 1.31036900  | 3.03257300  | -0.44997900 |
| H  | -0.97122000 | 1.54835000  | -0.04318700 |
| O  | 3.35493900  | 1.73644000  | 0.84815500  |
| H  | 3.79308700  | 2.04858900  | -1.13675100 |
| H  | 4.72643700  | -2.41301900 | 0.80322100  |
| H  | 1.54706900  | 3.16865600  | 0.48477000  |
| C  | 4.71779500  | 1.61852300  | 1.24262500  |
| H  | 5.04107100  | 0.57218800  | 1.22329400  |
| H  | 5.35899100  | 2.21205100  | 0.57977400  |
| H  | 4.78596800  | 2.00268800  | 2.26101900  |

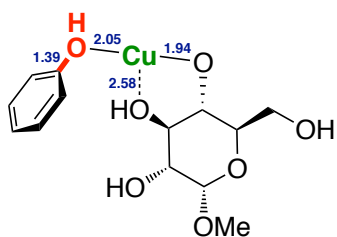

INT<sub>4-4\_-1</sub>

at M06-2X/6-31+G\*&SDD (for Cu)/SMD(water)

Energy = -1230.4267129999998 A.U.

Thermal correction to Gibbs Free Energy =

0.270523 A.U.

Sum of electronic and thermal Free Energies =

-1230.15619 A.U.

at M06-2X/6-311+G\*&SDD (for Cu)/SMD(water)

Energy = -1230.69756515 A.U.

|    |             |             |             |
|----|-------------|-------------|-------------|
| C  | -3.76531700 | 0.48633000  | 1.37084500  |
| C  | -3.60662700 | -0.49575300 | 0.39837100  |
| C  | -3.87429800 | -0.24450200 | -0.94407900 |
| C  | -4.30141700 | 1.02788700  | -1.31829000 |
| C  | -4.46507700 | 2.03100700  | -0.35983600 |
| C  | -4.20007100 | 1.75419700  | 0.98166000  |
| H  | -3.54269900 | 0.26050100  | 2.41053900  |
| H  | -3.73139000 | -1.03448500 | -1.67563200 |
| H  | -4.50692100 | 1.23419300  | -2.36442300 |
| H  | -4.79755100 | 3.02050900  | -0.65735200 |
| H  | -4.32523300 | 2.52714400  | 1.73407300  |
| O  | -3.13798100 | -1.76466400 | 0.72383600  |
| H  | -3.18759700 | -1.90082400 | 1.68720800  |
| Cu | -1.15002300 | -1.90743900 | 0.26108800  |
| O  | 0.76963900  | -1.96843000 | -0.02570100 |
| C  | 1.35090300  | -0.84701000 | -0.61729900 |
| C  | 2.79825100  | -0.67368700 | -0.12587900 |
| H  | 1.39061100  | -0.94502900 | -1.72213900 |
| C  | 0.58532800  | 0.44848100  | -0.31832000 |
| O  | 3.40836500  | 0.49068300  | -0.70115700 |
| H  | 2.79255500  | -0.57420700 | 0.97116400  |
| C  | 3.67231500  | -1.84846100 | -0.51458900 |
| C  | 1.31459300  | 1.67531400  | -0.85700100 |

|   |             |             |             |
|---|-------------|-------------|-------------|
| H | 0.46996300  | 0.53714000  | 0.77308200  |
| O | -0.70279000 | 0.34689300  | -0.92075200 |
| C | 2.76335600  | 1.70052000  | -0.37849600 |
| H | 3.20748000  | -2.77673600 | -0.16903700 |
| H | 3.77080500  | -1.88714100 | -1.60419900 |
| O | 4.99612800  | -1.72828700 | -0.00043200 |
| H | 1.32256700  | 1.62951200  | -1.95071900 |
| O | 0.64384300  | 2.87858900  | -0.51517900 |
| H | -1.29569000 | 1.00159500  | -0.51547100 |
| O | 2.74482100  | 1.94249100  | 1.00467500  |
| H | 3.33794700  | 2.48450700  | -0.88709400 |
| H | 4.94939900  | -1.76822100 | 0.96880800  |
| H | 0.70114700  | 2.98596200  | 0.45064600  |
| C | 4.04537600  | 2.08151100  | 1.56564600  |
| H | 4.58559400  | 1.12876900  | 1.54288100  |
| H | 4.61812700  | 2.83930100  | 1.01724400  |
| H | 3.91147000  | 2.40003400  | 2.60014100  |

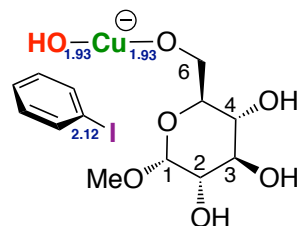

INT<sub>1-6\_anion</sub>

at M06-2X/6-31+G\*&SDD (for Cu & I)/SMD(water)

Energy = -1241.930948 A.U.

Thermal correction to Gibbs Free Energy =

0.261836 A.U.

Sum of electronic and thermal Free Energies =

-1241.669112 A.U.

at M06-2X/6-311+G\*&SDD (for Cu & I)/SMD(water)

Energy = -1242.20447664 A.U.

|    |             |             |             |
|----|-------------|-------------|-------------|
| Cu | -0.79549000 | -0.19589500 | 2.02272100  |
| C  | -1.49683700 | 1.24559300  | -1.26541300 |
| C  | -2.59035500 | 0.46405800  | -0.89984700 |
| C  | -3.78176900 | 1.04284800  | -0.46688100 |
| C  | -3.86908900 | 2.43536600  | -0.38989500 |

|   |             |             |             |
|---|-------------|-------------|-------------|
| C | -2.77826300 | 3.23246200  | -0.73867500 |
| C | -1.59599000 | 2.63568500  | -1.17713300 |
| H | -0.57817100 | 0.78150400  | -1.60991300 |
| H | -4.62780300 | 0.42515400  | -0.18295100 |
| H | -4.79339100 | 2.89164000  | -0.04801600 |
| H | -2.84993900 | 4.31350800  | -0.66925300 |
| H | -0.74205500 | 3.24851400  | -1.45263800 |
| C | 2.14540000  | -0.87705100 | 0.64974500  |
| O | 1.35388300  | 0.12309800  | -0.01032500 |
| C | 2.04115800  | 1.30978200  | -0.33042800 |
| C | 3.19151500  | 1.00363800  | -1.28316000 |
| H | 2.74988700  | 0.60322400  | -2.20584400 |
| C | 3.30455200  | -1.27721300 | -0.27046300 |
| H | 2.90108300  | -1.75850100 | -1.17334500 |
| C | 4.10737600  | -0.05047600 | -0.68203200 |
| H | 4.60250900  | 0.36206600  | 0.20882600  |
| I | -2.42158200 | -1.65279600 | -0.97502700 |
| C | 1.21397600  | -2.04266800 | 0.96844300  |
| H | 0.71278500  | -2.31190600 | 0.01786000  |
| H | 1.85222500  | -2.90145600 | 1.24018600  |
| O | 0.29961300  | -1.78858600 | 1.99341400  |
| O | 3.87939200  | 2.21207800  | -1.55473700 |
| H | 4.52072900  | 2.04082400  | -2.26354900 |
| O | 5.08154400  | -0.37268000 | -1.66547000 |
| H | 5.71247500  | -0.99658600 | -1.26931900 |
| O | 4.21697800  | -2.15160500 | 0.38330800  |
| H | 3.88655500  | -3.06141800 | 0.32134100  |
| H | 2.55089400  | -0.46521900 | 1.58622900  |
| O | 2.56079500  | 1.94911600  | 0.80372600  |
| C | 1.55065700  | 2.33086300  | 1.73180800  |
| H | 2.01523200  | 3.01744200  | 2.44140100  |
| H | 0.72507500  | 2.83612100  | 1.21337600  |
| H | 1.15835000  | 1.45716800  | 2.26579600  |
| H | 1.29896800  | 1.95838500  | -0.81345400 |
| O | -1.88067900 | 1.35328100  | 2.39069400  |
| H | -2.42855900 | 1.52373600  | 1.60951200  |

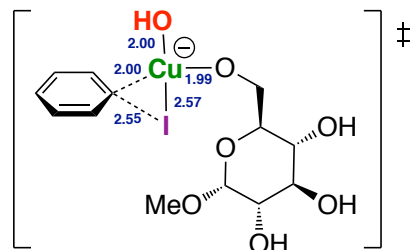

TS<sub>OA-6\_anion</sub>

at M06-2X/6-31+G\*&SDD (for Cu & I)/SMD(water)

Energy = -1241.8924439999998 A.U.

Thermal correction to Gibbs Free Energy =

0.264027 A.U.

Sum of electronic and thermal Free Energies =

-1241.628417 A.U.

at M06-2X/6-311+G\*&SDD (for Cu & I)/SMD(water)

Energy = -1242.16628836 A.U.

|    |             |             |             |
|----|-------------|-------------|-------------|
| Cu | -1.26576700 | -0.48739500 | 1.05189600  |
| C  | -2.02039700 | 1.61462700  | -0.64859300 |
| C  | -2.58310800 | 0.45852600  | -0.11543800 |
| C  | -3.92397900 | 0.38745000  | 0.25578100  |
| C  | -4.71010100 | 1.53341600  | 0.12252700  |
| C  | -4.16395200 | 2.71483900  | -0.38613900 |
| C  | -2.82268400 | 2.75301600  | -0.76831900 |
| H  | -0.98048000 | 1.63513500  | -0.96122800 |
| H  | -4.34540400 | -0.53109800 | 0.65242300  |
| H  | -5.75480000 | 1.49733000  | 0.41855500  |
| H  | -4.78487900 | 3.59920300  | -0.49075900 |
| H  | -2.39210000 | 3.66566300  | -1.17125100 |
| C  | 2.18568600  | -0.57631600 | 0.86297200  |
| O  | 1.42191000  | 0.15979100  | -0.10643300 |
| C  | 2.01868100  | 1.35874300  | -0.54476200 |
| C  | 3.35641800  | 1.05860100  | -1.21253600 |
| H  | 3.14697700  | 0.43587200  | -2.09280800 |
| C  | 3.53602500  | -0.95907900 | 0.24768400  |
| H  | 3.37085600  | -1.65024600 | -0.59159500 |
| C  | 4.25682800  | 0.27957200  | -0.26731000 |
| H  | 4.52392900  | 0.91452900  | 0.58967900  |
| I  | -1.68527700 | -1.66871000 | -1.19023600 |

|   |             |             |             |
|---|-------------|-------------|-------------|
| C | 1.34615900  | -1.78654300 | 1.26578800  |
| H | 1.11006900  | -2.33700700 | 0.33309400  |
| H | 1.99714900  | -2.44813100 | 1.86384900  |
| O | 0.20218900  | -1.44804200 | 1.98713500  |
| O | 3.94037800  | 2.28653300  | -1.61052100 |
| H | 4.72587700  | 2.08685700  | -2.14560800 |
| O | 5.42935900  | -0.06219300 | -0.99425500 |
| H | 6.05177500  | -0.48587400 | -0.38047900 |
| O | 4.39926200  | -1.55575800 | 1.20955500  |
| H | 4.19284400  | -2.50079800 | 1.28156700  |
| H | 2.35690100  | 0.05590200  | 1.74693900  |
| O | 2.23866800  | 2.25722900  | 0.50789200  |
| C | 1.02894600  | 2.71546700  | 1.10282700  |
| H | 1.31106500  | 3.41419000  | 1.89162300  |
| H | 0.41040900  | 3.23139800  | 0.35765800  |
| H | 0.46232200  | 1.88314800  | 1.53631800  |
| H | 1.31510800  | 1.79081800  | -1.26783900 |
| O | -1.78336500 | 0.59156000  | 2.65105400  |
| H | -2.50503200 | 1.17231000  | 2.36509500  |

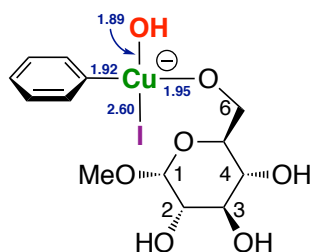

INT<sub>2-6</sub>\_anion

at M06-2X/6-31+G\*&SDD (for Cu & I)/SMD(water)

Energy = -1241.897452 A.U.

Thermal correction to Gibbs Free Energy =

0.265298 A.U.

Sum of electronic and thermal Free Energies =

-1241.632154 A.U.

at M06-2X/6-311+G\*&SDD (for Cu & I)/SMD(water)

Energy = -1242.16973505 A.U.

|    |             |             |             |
|----|-------------|-------------|-------------|
| Cu | -1.24901100 | -0.38887200 | 1.00766800  |
| C  | -2.06065200 | 1.79931800  | -0.56754300 |

|   |             |             |             |
|---|-------------|-------------|-------------|
| C | -2.55904500 | 0.75549700  | 0.20044900  |
| C | -3.90859500 | 0.63585000  | 0.50425800  |
| C | -4.79167200 | 1.60134300  | 0.00979200  |
| C | -4.31749100 | 2.66106500  | -0.76588600 |
| C | -2.95553700 | 2.76001100  | -1.05241500 |
| H | -1.00097800 | 1.86975500  | -0.79974100 |
| H | -4.27664400 | -0.18803900 | 1.10925100  |
| H | -5.85148900 | 1.52021400  | 0.23522200  |
| H | -5.00836800 | 3.40729000  | -1.14667800 |
| H | -2.58043400 | 3.58171300  | -1.65651800 |
| C | 2.14086700  | -0.54581200 | 0.84413300  |
| O | 1.37766400  | 0.23173200  | -0.09250800 |
| C | 2.00140700  | 1.42206300  | -0.52242800 |
| C | 3.31487500  | 1.09729900  | -1.22584100 |
| H | 3.07230200  | 0.48800200  | -2.10689500 |
| C | 3.47776600  | -0.93879100 | 0.20426000  |
| H | 3.28743900  | -1.61303500 | -0.64340200 |
| C | 4.21640000  | 0.29061200  | -0.30576800 |
| H | 4.51190800  | 0.90987500  | 0.55313400  |
| I | -1.63362200 | -1.88291200 | -1.08595200 |
| C | 1.29706100  | -1.76421100 | 1.20973700  |
| H | 1.09894400  | -2.31565900 | 0.27185000  |
| H | 1.92857500  | -2.41785000 | 1.83481900  |
| O | 0.12451000  | -1.44769200 | 1.89656800  |
| O | 3.91677200  | 2.31636200  | -1.62471600 |
| H | 4.68765400  | 2.10568200  | -2.17654500 |
| O | 5.36827400  | -0.06877100 | -1.05671700 |
| H | 5.99240300  | -0.51150300 | -0.45833200 |
| O | 4.34095100  | -1.56851400 | 1.14471300  |
| H | 4.12954000  | -2.51410100 | 1.19028600  |
| H | 2.32959400  | 0.05562200  | 1.74567300  |
| O | 2.27743500  | 2.29212300  | 0.54002900  |
| C | 1.10146500  | 2.81255600  | 1.15052600  |
| H | 1.42983900  | 3.46683400  | 1.95943000  |
| H | 0.52019900  | 3.39144800  | 0.42208300  |
| H | 0.48113500  | 2.00784300  | 1.55955500  |
| H | 1.29391500  | 1.88887500  | -1.21945900 |
| O | -1.50888400 | 0.63027800  | 2.58360000  |

H -2.15714200 1.33371300 2.43195300

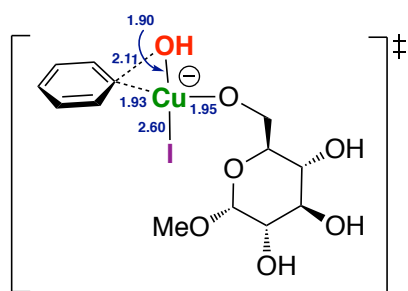

**TS<sub>RE-6</sub>\_anion**

at M06-2X/6-31+G\*&SDD (for Cu & I)/SMD(water)

Energy = -1241.888264 A.U.

Thermal correction to Gibbs Free Energy =

0.264772 A.U.

Sum of electronic and thermal Free Energies =

-1241.623492 A.U.

at M06-2X/6-311+G\*&SDD (for Cu & I)/SMD(water)

Energy = -1242.16012343 A.U.

Cu -1.20801300 -0.20741200 1.02080800

C -1.95122500 1.97202000 -0.55396500

C -2.47730200 1.09417600 0.38079300

C -3.83680100 0.91344900 0.58333200

C -4.71422700 1.62971700 -0.23575500

C -4.22540600 2.50374900 -1.20924700

C -2.84850700 2.67208100 -1.36605600

H -0.87808400 2.10162300 -0.66272700

H -4.21009700 0.22369500 1.33471500

H -5.78477100 1.49515600 -0.10870600

H -4.91566900 3.05669900 -1.83867800

H -2.46114600 3.35368800 -2.11815000

C 2.19947700 -0.57567900 0.83207600

O 1.42642300 0.26994400 -0.03469800

C 2.10293600 1.42552500 -0.47610800

C 3.33492100 1.02991300 -1.28360100

H 2.98322100 0.47546200 -2.16408700

C 3.43777000 -1.06280200 0.07247400

H 3.11963300 -1.68701600 -0.77536600

C 4.23435400 0.12078600 -0.45997700

H 4.64264800 0.68450400 0.39083200

I -1.85284000 -1.99844900 -0.89254700

C 1.28524400 -1.71352100 1.27685300

H 1.00103900 -2.27658400 0.36698800

H 1.89753200 -2.39570100 1.89228300

O 0.17217700 -1.27139500 1.99218400

O 4.00142600 2.21413200 -1.68487000

H 4.71238900 1.96734900 -2.29873000

O 5.29470200 -0.30076800 -1.30728000

H 5.93533600 -0.79184600 -0.76673300

O 4.31709300 -1.79685500 0.91670500

H 3.99173100 -2.70707400 1.00027400

H 2.51692400 0.00250800 1.71266000

O 2.51894300 2.23789300 0.58855900

C 1.43776200 2.68272500 1.40084400

H 1.84997400 3.41106400 2.10081100

H 0.66596600 3.16109600 0.78461200

H 0.99625400 1.84869200 1.95578000

H 1.38283100 1.96685500 -1.10275500

O -1.45667500 1.24729700 2.21917500

H -2.27950100 1.08772400 2.71036800

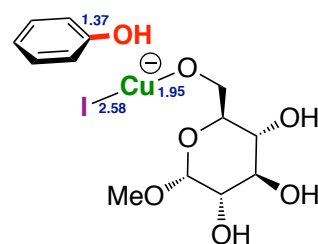

**INT<sub>3-6</sub>\_anion**

at M06-2X/6-31+G\*&SDD (for Cu & I)/SMD(water)

Energy = -1241.995838 A.U.

Thermal correction to Gibbs Free Energy =

0.263612 A.U.

Sum of electronic and thermal Free Energies =

-1241.732226 A.U.

at M06-2X/6-311+G\*&SDD (for Cu & I)/ SMD(water)

Energy = -1242.26715799 A.U.



|    |             |             |             |    |             |             |             |
|----|-------------|-------------|-------------|----|-------------|-------------|-------------|
| Cu | -1.38579200 | -1.29423500 | 0.53064700  | H  | 2.30309900  | 1.98071000  | -0.91821800 |
| C  | -0.95020500 | 1.79101900  | -0.14169200 | O  | -1.25490100 | 1.48978100  | 2.18327300  |
| C  | -1.73492000 | 1.98519400  | 0.99738300  | H  | -1.88813200 | 1.66959600  | 2.89826600  |
| C  | -2.96088000 | 2.64564500  | 0.91217000  |    |             |             |             |
| C  | -3.40374000 | 3.10833700  | -0.32759600 |    |             |             |             |
| C  | -2.63091300 | 2.92122900  | -1.47417400 |    |             |             |             |
| C  | -1.40301600 | 2.26276900  | -1.37178200 |    |             |             |             |
| H  | -0.00721700 | 1.25782500  | -0.05335700 |    |             |             |             |
| H  | -3.56284500 | 2.78382300  | 1.80698100  |    |             |             |             |
| H  | -4.36154400 | 3.61663100  | -0.39255900 |    |             |             |             |
| H  | -2.98151200 | 3.28208900  | -2.43607200 |    |             |             |             |
| H  | -0.79341700 | 2.10499400  | -2.25738500 |    |             |             |             |
| C  | 2.53013300  | -0.98442900 | 0.50744000  |    |             |             |             |
| O  | 1.99576500  | 0.12289400  | -0.23263100 |    |             |             |             |
| C  | 2.86596400  | 1.22364300  | -0.35606100 |    |             |             |             |
| C  | 4.12143300  | 0.80010400  | -1.11084600 |    |             |             |             |
| H  | 3.80720100  | 0.49418100  | -2.11802900 |    |             |             |             |
| C  | 3.76825000  | -1.51313100 | -0.22307700 |    |             |             |             |
| H  | 3.47169600  | -1.90643100 | -1.20628100 |    |             |             |             |
| C  | 4.77628300  | -0.38840300 | -0.42250200 |    |             |             |             |
| H  | 5.15408700  | -0.07622200 | 0.56163200  |    |             |             |             |
| I  | -3.71069200 | -1.19548300 | -0.59261900 |    |             |             |             |
| C  | 1.40490600  | -2.00369400 | 0.63451800  |    |             |             |             |
| H  | 1.09704800  | -2.27673500 | -0.39149400 |    |             |             |             |
| H  | 1.83914200  | -2.91393000 | 1.08602300  |    |             |             |             |
| O  | 0.34241300  | -1.51747300 | 1.40590300  |    |             |             |             |
| O  | 4.99591600  | 1.91181100  | -1.18869600 |    |             |             |             |
| H  | 5.75351300  | 1.65773600  | -1.74107500 |    |             |             |             |
| O  | 5.86210200  | -0.79662900 | -1.24381800 |    |             |             |             |
| H  | 6.35607800  | -1.48628800 | -0.77033900 |    |             |             |             |
| O  | 4.43443300  | -2.52177600 | 0.52728200  |    |             |             |             |
| H  | 3.98808200  | -3.37155900 | 0.38667700  |    |             |             |             |
| H  | 2.82145700  | -0.64438800 | 1.51258200  |    |             |             |             |
| O  | 3.25194300  | 1.73932400  | 0.88961200  |    |             |             |             |
| C  | 2.15005300  | 2.20372800  | 1.66279500  |    |             |             |             |
| H  | 2.56820300  | 2.66866100  | 2.55666200  |    |             |             |             |
| H  | 1.57038400  | 2.94473800  | 1.09780300  |    |             |             |             |
| H  | 1.49786300  | 1.37246800  | 1.95133100  |    |             |             |             |
|    |             |             |             | Cu | -1.12630900 | -1.44309300 | -0.04271900 |
|    |             |             |             | C  | -3.09263300 | 0.48255500  | 0.75259500  |
|    |             |             |             | C  | -2.31622300 | 0.01016700  | -0.29226000 |
|    |             |             |             | C  | -2.23905800 | 0.62299900  | -1.53332300 |
|    |             |             |             | C  | -2.96333200 | 1.80541600  | -1.72124100 |
|    |             |             |             | C  | -3.73885500 | 2.32574300  | -0.68383900 |
|    |             |             |             | C  | -3.80649600 | 1.66868000  | 0.54572000  |
|    |             |             |             | H  | -3.14115300 | -0.03813500 | 1.70476800  |
|    |             |             |             | H  | -1.62754500 | 0.21242200  | -2.33235700 |
|    |             |             |             | H  | -2.91756000 | 2.31332600  | -2.68027600 |
|    |             |             |             | H  | -4.29858900 | 3.24345500  | -0.83700700 |
|    |             |             |             | H  | -4.41620500 | 2.07179600  | 1.34927500  |
|    |             |             |             | C  | 1.71063300  | -1.10833900 | 0.13593900  |
|    |             |             |             | O  | 0.52265000  | -0.28897800 | -0.08689100 |
|    |             |             |             | C  | 0.62618100  | 1.03896600  | 0.45579700  |
|    |             |             |             | C  | 1.75345700  | 1.75455600  | -0.27781700 |
|    |             |             |             | H  | 1.48267500  | 1.78408600  | -1.34192200 |
|    |             |             |             | C  | 2.89214200  | -0.44834500 | -0.57365100 |

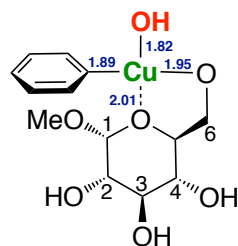

INT<sub>3-6</sub>-1

at M06-2X/6-31+G\*&SDD (for Cu)/SMD(water)

Energy = -1230.330189 A.U.

Thermal correction to Gibbs Free Energy =

0.27276 A.U.

Sum of electronic and thermal Free Energies =

-1230.057429 A.U.

at M06-2X/6-311+G\*&SDD (for Cu)/SMD(water)

Energy = -1230.60172474 A.U.

|   |             |             |             |
|---|-------------|-------------|-------------|
| H | 2.71564200  | -0.46149500 | -1.65838500 |
| C | 3.06365700  | 0.99537400  | -0.12125200 |
| H | 3.36698300  | 1.00520200  | 0.93477500  |
| C | 1.35100300  | -2.48558400 | -0.39810500 |
| H | 1.30220900  | -2.42348800 | -1.50086200 |
| H | 2.17210000  | -3.17388200 | -0.14462600 |
| O | 0.13617700  | -2.91380400 | 0.15349700  |
| O | 1.83703400  | 3.06561000  | 0.24646600  |
| H | 2.45347800  | 3.57124200  | -0.30857700 |
| O | 4.03053800  | 1.67268000  | -0.90872000 |
| H | 4.90108400  | 1.28270600  | -0.72527400 |
| O | 4.10036400  | -1.12539600 | -0.26012800 |
| H | 4.17097700  | -1.92579700 | -0.80475400 |
| H | 1.88935600  | -1.15594600 | 1.21671100  |
| O | 0.90969300  | 1.00842800  | 1.81385900  |
| C | -0.18027300 | 0.54855300  | 2.61168000  |
| H | 0.18108700  | 0.51232200  | 3.63972500  |
| H | -1.02117400 | 1.24614100  | 2.53579200  |
| H | -0.49864300 | -0.45396000 | 2.29830300  |
| H | -0.33794100 | 1.51838000  | 0.25908600  |
| O | -2.61606600 | -2.48862300 | -0.15029200 |
| H | -3.43816300 | -1.98246400 | -0.22932500 |

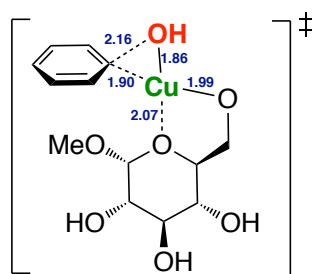

TS<sub>RE-6\_-I</sub>

at M06-2X/6-31+G\*&SDD (for Cu)/SMD(water)

Energy = -1230.325599 A.U.

Thermal correction to Gibbs Free Energy =

0.271651 A.U.

Sum of electronic and thermal Free Energies =

-1230.053948 A.U.

at M06-2X/6-311+G\*&SDD (for Cu)/ SMD(water)

Energy = -1230.59746069 A.U.

|    |             |             |             |
|----|-------------|-------------|-------------|
| Cu | -1.19425700 | -1.44607900 | 0.00461100  |
| C  | -3.05153200 | 0.57248000  | 0.78763200  |
| C  | -2.46093900 | -0.06000600 | -0.29181200 |
| C  | -2.38230700 | 0.47136900  | -1.56790200 |
| C  | -2.89378400 | 1.76170300  | -1.75369000 |
| C  | -3.46716700 | 2.45369900  | -0.68667800 |
| C  | -3.54749000 | 1.86189700  | 0.57658900  |
| H  | -3.11863800 | 0.09141500  | 1.75853000  |
| H  | -1.92501600 | -0.07603100 | -2.38717500 |
| H  | -2.83651400 | 2.21816700  | -2.73760800 |
| H  | -3.86165700 | 3.45327600  | -0.84070100 |
| H  | -4.00442600 | 2.39706700  | 1.40398200  |
| C  | 1.69475600  | -1.13344000 | 0.13554300  |
| O  | 0.53067000  | -0.29703700 | -0.09321100 |
| C  | 0.64987800  | 1.02694800  | 0.43190000  |
| C  | 1.78761200  | 1.72495000  | -0.30355900 |
| H  | 1.51797700  | 1.75677700  | -1.36779400 |
| C  | 2.88735200  | -0.50507600 | -0.58427500 |
| H  | 2.70809300  | -0.52510100 | -1.66869000 |
| C  | 3.08361700  | 0.94036800  | -0.14501100 |
| H  | 3.38917000  | 0.95265800  | 0.91042200  |
| C  | 1.30871500  | -2.51565000 | -0.37457000 |
| H  | 1.23305800  | -2.45688500 | -1.47744500 |
| H  | 2.14234000  | -3.19946800 | -0.14470500 |
| O  | 0.10999100  | -2.94158500 | 0.20923100  |
| O  | 1.89888000  | 3.03636200  | 0.21579600  |
| H  | 2.53422700  | 3.52355900  | -0.33432400 |
| O  | 4.06275300  | 1.59477900  | -0.93794600 |
| H  | 4.92600600  | 1.19071900  | -0.75074600 |
| O  | 4.08842700  | -1.19594200 | -0.26940700 |
| H  | 4.14297000  | -2.00477800 | -0.80303900 |
| H  | 1.88255600  | -1.17413000 | 1.21597700  |
| O  | 0.93736900  | 1.01368900  | 1.79346400  |
| C  | -0.13849100 | 0.54223600  | 2.60113800  |
| H  | 0.23595600  | 0.50127700  | 3.62458500  |
| H  | -0.98486600 | 1.23463900  | 2.54186200  |
| H  | -0.45564600 | -0.46078400 | 2.28775000  |
| H  | -0.31294500 | 1.51325200  | 0.23209500  |

|   |             |             |             |
|---|-------------|-------------|-------------|
| O | -2.90762200 | -2.16639800 | -0.10611700 |
| H | -3.16426500 | -2.19917900 | -1.04299900 |

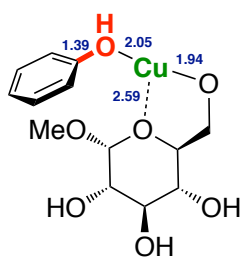

INT<sub>4-6\_-I</sub>

at M06-2X/6-31+G\*&SDD (for Cu)/SMD(water)

Energy = -1230.4261769999998 A.U.

Thermal correction to Gibbs Free Energy =

0.270351 A.U.

Sum of electronic and thermal Free Energies =

-1230.155826 A.U.

at M06-2X/6-311+G\*&SDD (for Cu)/ SMD(water)

Energy = -1230.69728731 A.U.

|    |             |             |             |
|----|-------------|-------------|-------------|
| Cu | -1.28498500 | -2.17147300 | 0.07128300  |
| C  | -3.24904300 | 0.85887000  | 0.66323200  |
| C  | -2.94156600 | 0.12094200  | -0.47401200 |
| C  | -2.50225200 | 0.73375500  | -1.64448900 |
| C  | -2.37579100 | 2.12247400  | -1.67178800 |
| C  | -2.67744600 | 2.88268900  | -0.53974900 |
| C  | -3.11179500 | 2.24667900  | 0.62430200  |
| H  | -3.58283000 | 0.34670000  | 1.56089500  |
| H  | -2.25854500 | 0.12763800  | -2.51327300 |
| H  | -2.03345600 | 2.60810800  | -2.58078500 |
| H  | -2.57157700 | 3.96274400  | -0.56449500 |
| H  | -3.34580600 | 2.82983400  | 1.51012100  |
| C  | 1.69980400  | -1.10268100 | 0.06086300  |
| O  | 0.51642400  | -0.31793200 | -0.15755000 |
| C  | 0.55718600  | 0.96272200  | 0.43512600  |
| C  | 1.68335700  | 1.77149700  | -0.19866500 |
| H  | 1.44346100  | 1.87835200  | -1.26576800 |
| C  | 2.88122200  | -0.39026400 | -0.60365500 |
| H  | 2.71613200  | -0.34824100 | -1.69008400 |

|   |             |             |             |
|---|-------------|-------------|-------------|
| C | 3.00608400  | 1.03027300  | -0.06562500 |
| H | 3.28882600  | 0.97984100  | 0.99558000  |
| C | 1.42250500  | -2.49285300 | -0.49959800 |
| H | 1.20745300  | -2.37487300 | -1.57905700 |
| H | 2.36182000  | -3.06702000 | -0.42283000 |
| O | 0.38891000  | -3.15606200 | 0.17518700  |
| O | 1.72441300  | 3.04326100  | 0.42351000  |
| H | 2.37542400  | 3.58867400  | -0.04764700 |
| O | 3.97692600  | 1.77886800  | -0.78426300 |
| H | 4.84850200  | 1.38423700  | -0.61621200 |
| O | 4.11602000  | -1.03734100 | -0.31969600 |
| H | 4.21967600  | -1.80090000 | -0.90915900 |
| H | 1.88497300  | -1.18568200 | 1.14150600  |
| O | 0.78149500  | 0.89269600  | 1.81653400  |
| C | -0.30246300 | 0.30460000  | 2.52915200  |
| H | 0.04194800  | 0.14526800  | 3.55208500  |
| H | -1.16501000 | 0.98010500  | 2.53021500  |
| H | -0.59010800 | -0.65878200 | 2.08622100  |
| H | -0.41832100 | 1.42032100  | 0.22828100  |
| O | -3.06204000 | -1.26629500 | -0.39066700 |
| H | -3.23399500 | -1.63337000 | -1.27779900 |

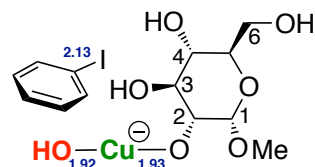

INT<sub>1\_MET</sub>

at M06-2X/6-31+G\*&SDD (for Cu & I)/SMD(water)

Energy = -1241.9350670000001 A.U.

Thermal correction to Gibbs Free Energy =

0.261287 A.U.

Sum of electronic and thermal Free Energies =

-1241.67378 A.U.

at M06-2X/6-311+G\*&SDD (for Cu & I)/SMD(water)

Energy = -1242.20824267 A.U.

|   |             |             |             |
|---|-------------|-------------|-------------|
| C | -3.98063900 | -1.13411400 | -0.38125400 |
| C | -2.69356900 | -0.95110400 | 0.12036100  |

|    |             |             |             |
|----|-------------|-------------|-------------|
| C  | -2.46210700 | -0.18850800 | 1.26356500  |
| C  | -3.54823300 | 0.40050500  | 1.91464900  |
| C  | -4.84285800 | 0.23197400  | 1.42389100  |
| C  | -5.05622800 | -0.53514200 | 0.27846400  |
| H  | -4.14794100 | -1.72649500 | -1.27515100 |
| H  | -1.45344000 | -0.03734400 | 1.63544500  |
| H  | -3.37249500 | 0.99980200  | 2.80327400  |
| H  | -5.68238000 | 0.69777000  | 1.93084600  |
| H  | -6.06096900 | -0.67049300 | -0.11091400 |
| O  | 0.91572600  | -0.06880200 | 1.58884200  |
| I  | -1.04688600 | -1.81583500 | -0.91353300 |
| Cu | -0.88763600 | 2.25314000  | -0.24628800 |
| H  | 1.13003600  | -0.76455600 | 3.53359500  |
| C  | 0.95542300  | -1.14241900 | 2.51815800  |
| H  | 1.74070400  | -1.86196500 | 2.25908100  |
| H  | -0.01596600 | -1.64012700 | 2.47547900  |
| C  | 2.02452000  | 0.78370200  | 1.66615200  |
| H  | 2.11499100  | 1.18739400  | 2.68322700  |
| O  | 3.23565300  | 0.08179600  | 1.44348500  |
| C  | 1.85765200  | 1.90831200  | 0.63825400  |
| C  | 3.31725600  | -0.54641000 | 0.16430600  |
| H  | 2.73828200  | 2.56237400  | 0.78396600  |
| C  | 1.97727900  | 1.32487800  | -0.77530700 |
| O  | 0.68295200  | 2.63375100  | 0.81570200  |
| H  | 2.47367800  | -1.24483800 | 0.03931800  |
| C  | 3.24367400  | 0.50685600  | -0.94837000 |
| C  | 4.61716900  | -1.32711300 | 0.14277700  |
| H  | 1.11218300  | 0.66660400  | -0.96152100 |
| O  | 1.98269900  | 2.37437900  | -1.73688800 |
| H  | 4.11962100  | 1.16824500  | -0.88795300 |
| O  | 3.18738300  | -0.11736400 | -2.22699200 |
| H  | 4.78127200  | -1.74557800 | -0.85675500 |
| H  | 5.44938600  | -0.65905000 | 0.38496400  |
| O  | 4.63386600  | -2.35929900 | 1.12132800  |
| H  | 1.19610200  | 2.91996000  | -1.55065000 |
| H  | 4.08887900  | -0.29048100 | -2.53996600 |
| H  | 3.95421400  | -3.01235600 | 0.88649100  |
| O  | -2.44198000 | 2.08133100  | -1.36016400 |

H -2.96619300 1.35450300 -0.98954300

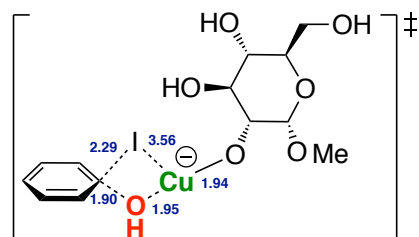

TS<sub>MET</sub>

at M06-2X/6-31+G\*&SDD (for Cu & I)/SMD(water)

Energy = -1241.885935 A.U.

Thermal correction to Gibbs Free Energy =

0.26336 A.U.

Sum of electronic and thermal Free Energies =

-1241.622575 A.U.

at M06-2X/6-311+G\*&SDD (for Cu & I)/SMD(water)

Energy = -1242.15961511 A.U.

|    |             |             |             |
|----|-------------|-------------|-------------|
| C  | -4.22243900 | -0.45471900 | -0.58201500 |
| C  | -2.92357100 | -0.21791600 | -0.08957300 |
| C  | -2.72487600 | -0.10653700 | 1.30247700  |
| C  | -3.82126400 | -0.13841800 | 2.16040000  |
| C  | -5.12138900 | -0.31829400 | 1.67718000  |
| C  | -5.30077500 | -0.48003600 | 0.30072600  |
| H  | -4.38002000 | -0.60147500 | -1.64594400 |
| H  | -1.72048000 | 0.02879400  | 1.69435500  |
| H  | -3.64634000 | -0.03142300 | 3.22843800  |
| H  | -5.96714700 | -0.35256300 | 2.35628200  |
| H  | -6.29685800 | -0.64488800 | -0.10343300 |
| O  | 0.93139300  | -0.14650700 | 1.48264200  |
| I  | -1.25839900 | -1.32233800 | -1.21765200 |
| Cu | -0.64678700 | 1.97992600  | -0.04508200 |
| H  | 0.86357200  | -0.89710200 | 3.41790700  |
| C  | 0.80245500  | -1.24229300 | 2.37790500  |
| H  | 1.58068100  | -1.99296900 | 2.19842900  |
| H  | -0.17716200 | -1.68955200 | 2.19669300  |
| C  | 2.08975800  | 0.61352900  | 1.68991400  |
| H  | 2.12463500  | 0.96655100  | 2.72893100  |

|   |             |             |             |    |             |             |             |
|---|-------------|-------------|-------------|----|-------------|-------------|-------------|
| O | 3.26212100  | -0.16847600 | 1.53085300  | C  | -3.27555400 | 0.82838900  | -0.05472800 |
| C | 2.10161900  | 1.78642400  | 0.70422300  | C  | -2.95941400 | 0.77247500  | 1.29920100  |
| C | 3.41207200  | -0.74652400 | 0.23333800  | C  | -3.68759300 | -0.07765800 | 2.12955700  |
| H | 3.01778700  | 2.35642400  | 0.94751300  | C  | -4.71975400 | -0.86130400 | 1.60997300  |
| C | 2.28106700  | 1.24445000  | -0.71825700 | C  | -5.02465000 | -0.78525700 | 0.25008200  |
| O | 0.98463200  | 2.61317700  | 0.79639700  | H  | -4.52839300 | 0.12167300  | -1.65427300 |
| H | 2.53791200  | -1.37834100 | 0.00688400  | H  | -2.13853300 | 1.37748300  | 1.68013000  |
| C | 3.50102400  | 0.35283200  | -0.83577900 | H  | -3.43876700 | -0.13119200 | 3.18547500  |
| C | 4.65469300  | -1.61440800 | 0.28569600  | H  | -5.28036100 | -1.52653900 | 2.25904000  |
| H | 1.39127800  | 0.64887300  | -0.98440700 | H  | -5.82410600 | -1.39199800 | -0.16462500 |
| O | 2.40093600  | 2.33327700  | -1.62626200 | O  | 0.63371900  | 0.45834600  | 1.41339600  |
| H | 4.41200900  | 0.94798700  | -0.67965700 | I  | -0.82370600 | -1.94031300 | -1.09106300 |
| O | 3.50016900  | -0.21159000 | -2.14313100 | Cu | -0.64420600 | 2.20162800  | -0.34859000 |
| H | 4.89087400  | -1.98415100 | -0.71854700 | H  | 0.41084100  | 0.13660900  | 3.45263800  |
| H | 5.49959800  | -1.02135100 | 0.64871600  | C  | 0.31950100  | -0.40121300 | 2.50004600  |
| O | 4.50726500  | -2.70067000 | 1.19246100  | H  | 0.97773400  | -1.27792300 | 2.51319600  |
| H | 1.69351200  | 2.95599100  | -1.37353600 | H  | -0.71267900 | -0.72849200 | 2.36043500  |
| H | 4.40302800  | -0.47180500 | -2.38372500 | C  | 1.87088800  | 1.10324500  | 1.54374000  |
| H | 3.81173900  | -3.28944800 | 0.85487900  | H  | 1.89891000  | 1.67368300  | 2.48151000  |
| O | -2.32770100 | 1.41279800  | -0.86636200 | O  | 2.93539600  | 0.17336100  | 1.64996900  |
| H | -3.02745100 | 1.99188000  | -0.51705100 | C  | 2.08467100  | 2.01635800  | 0.33129800  |

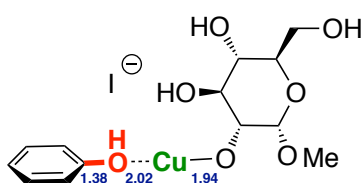

INT<sub>2</sub>-MET

at M06-2X/6-31+G\*&SDD (for Cu & I)/SMD(water)

Energy = -1241.99592 A.U.

Thermal correction to Gibbs Free Energy =

0.265464 A.U.

Sum of electronic and thermal Free Energies =

-1241.730456 A.U.

at M06-2X/6-311+G\*&SDD (for Cu & I)/SMD(water)

Energy = -1242.26724487 A.U.

|   |             |            |             |   |            |             |            |
|---|-------------|------------|-------------|---|------------|-------------|------------|
| C | -4.30633800 | 0.06329600 | -0.59187000 | H | 3.08881200 | -3.05347500 | 1.72658700 |
|---|-------------|------------|-------------|---|------------|-------------|------------|

|   |             |            |             |
|---|-------------|------------|-------------|
| O | -2.52698900 | 1.67606800 | -0.85306600 |
| H | -2.68862000 | 1.50152100 | -1.79698700 |

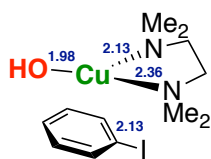

INT<sub>1</sub>\_TMEDA

at M06-2X/6-31+G\*&SDD (for Cu & I)/SMD(water)

Energy = -863.75529000000001 A.U.

Thermal correction to Gibbs Free Energy =

0.277326 A.U.

Sum of electronic and thermal Free Energies =

-863.477964 A.U.

at M06-2X/6-311+G\*&SDD (for Cu & I)/SMD(water)

Energy = -863.912497164 A.U.

|    |             |             |             |
|----|-------------|-------------|-------------|
| Cu | -0.80961000 | 0.80111000  | -0.53267000 |
| N  | -1.94854300 | 1.16415400  | 1.22497200  |
| N  | -2.65761900 | -0.55696600 | -1.09462900 |
| C  | -1.20540200 | 1.15971100  | 2.49065300  |
| H  | -0.69351700 | 0.20222300  | 2.61901100  |
| H  | -0.46469500 | 1.96336800  | 2.48417000  |
| C  | -2.56982900 | 2.48649700  | 1.05197200  |
| H  | -3.29668200 | 2.68621800  | 1.85620900  |
| H  | -1.79178300 | 3.25349900  | 1.08005500  |
| H  | -3.07902600 | 2.55336500  | 0.08837700  |
| C  | -2.97542400 | 0.10452500  | 1.26875400  |
| H  | -2.48304500 | -0.81371400 | 1.60851000  |
| H  | -3.74752300 | 0.36210200  | 2.01244600  |
| C  | -3.63274500 | -0.12896100 | -0.08497400 |
| H  | -4.10719100 | 0.79364400  | -0.43228400 |
| H  | -4.43568700 | -0.87631200 | 0.02973800  |
| C  | -2.42626300 | -1.99748100 | -1.01499300 |
| H  | -3.33771500 | -2.56224400 | -1.27828200 |
| H  | -1.62619300 | -2.28257600 | -1.70478000 |
| H  | -2.12321100 | -2.28207000 | -0.00397800 |
| C  | -3.10426500 | -0.20499000 | -2.44003500 |

|   |             |             |             |
|---|-------------|-------------|-------------|
| H | -4.06510400 | -0.68604100 | -2.69317200 |
| H | -3.22299600 | 0.87968100  | -2.51984400 |
| H | -2.35484500 | -0.52717500 | -3.16941000 |
| H | -1.88463500 | 1.31753700  | 3.34430700  |
| O | 0.30540000  | 1.21603600  | -2.11751500 |
| H | 1.20049800  | 1.40018100  | -1.79373300 |
| C | 3.31869100  | -0.27149400 | -0.90162800 |
| C | 2.38663500  | -0.11861000 | 0.12144000  |
| C | 2.25158400  | 1.08698400  | 0.80662600  |
| C | 3.06377400  | 2.16444100  | 0.44822200  |
| C | 3.99722300  | 2.03211900  | -0.58051100 |
| C | 4.12518600  | 0.81478100  | -1.24939700 |
| H | 3.41232500  | -1.21485400 | -1.43005000 |
| H | 1.52035800  | 1.19171000  | 1.60202600  |
| H | 2.95900600  | 3.10834800  | 0.97515900  |
| H | 4.62345000  | 2.87428200  | -0.85862900 |
| H | 4.85073000  | 0.70356200  | -2.04984300 |
| I | 1.09530400  | -1.73623800 | 0.60778100  |

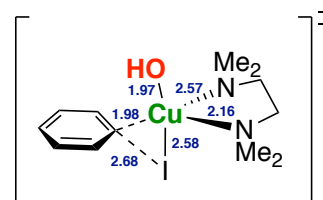

TS<sub>OA</sub>\_TMEDA

at M06-2X/6-31+G\*&SDD (for Cu & I)/SMD(water)

Energy = -863.718668 A.U.

Thermal correction to Gibbs Free Energy =

0.284313 A.U.

Sum of electronic and thermal Free Energies =

-863.434355 A.U.

at M06-2X/6-311+G\*&SDD (for Cu & I)/SMD(water)

Energy = -863.875984275 A.U.

|    |             |            |             |
|----|-------------|------------|-------------|
| Cu | -0.21635200 | 0.25384400 | -0.55985500 |
| N  | -1.49334300 | 1.21961400 | 1.45107300  |
| N  | -2.27457700 | 0.01787500 | -1.17964300 |
| C  | -1.25948500 | 0.62416200 | 2.76329100  |

|   |             |             |             |
|---|-------------|-------------|-------------|
| H | -1.44910300 | -0.45220200 | 2.72565700  |
| H | -0.21912200 | 0.78194100  | 3.06504500  |
| C | -1.19062000 | 2.64809900  | 1.50720000  |
| H | -1.78029100 | 3.14980500  | 2.29458300  |
| H | -0.12743600 | 2.79528300  | 1.72179100  |
| H | -1.41337900 | 3.12664100  | 0.55072200  |
| C | -2.88263000 | 0.99963300  | 1.03414000  |
| H | -3.20273900 | 0.02079200  | 1.40349200  |
| H | -3.55318400 | 1.74531500  | 1.49485600  |
| C | -3.04797100 | 1.06127400  | -0.47654500 |
| H | -2.70843700 | 2.03096300  | -0.85431500 |
| H | -4.11582300 | 0.96073100  | -0.72942300 |
| C | -2.83202400 | -1.31450600 | -0.90957500 |
| H | -3.89899200 | -1.34450800 | -1.17919300 |
| H | -2.29515400 | -2.05650800 | -1.50583600 |
| H | -2.72129700 | -1.58203400 | 0.14238700  |
| C | -2.34870700 | 0.26242000  | -2.62816700 |
| H | -3.38794200 | 0.17887300  | -2.98153700 |
| H | -1.97318600 | 1.26140000  | -2.85308400 |
| H | -1.73711500 | -0.47564600 | -3.15460100 |
| H | -1.91228400 | 1.06988500  | 3.53455700  |
| O | -0.01986900 | 1.93743600  | -1.55753200 |
| H | 0.86153400  | 2.27964200  | -1.34488300 |
| C | 2.54777200  | 0.04851600  | -1.32558800 |
| C | 1.73804400  | 0.26344600  | -0.21591900 |
| C | 2.15232000  | 1.00669000  | 0.88086100  |
| C | 3.42429700  | 1.58863100  | 0.84356800  |
| C | 4.25401000  | 1.40593400  | -0.26263200 |
| C | 3.81464900  | 0.63711100  | -1.34261000 |
| H | 2.20451200  | -0.55068700 | -2.16337100 |
| H | 1.51151300  | 1.13775500  | 1.74693900  |
| H | 3.76071300  | 2.18034800  | 1.69035000  |
| H | 5.24204900  | 1.85552400  | -0.28172000 |
| H | 4.45669300  | 0.48755800  | -2.20617100 |
| I | 0.47262600  | -1.99080600 | 0.49946500  |

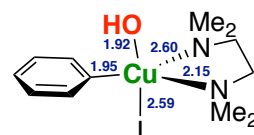

INT<sub>2</sub>\_TMEDA

at M06-2X/6-31+G\*&SDD (for Cu & I)/SMD(water)

Energy = -863.718833 A.U.

Thermal correction to Gibbs Free Energy =

0.281236 A.U.

Sum of electronic and thermal Free Energies =

-863.437597 A.U.

at M06-2X/6-311+G\*&SDD (for Cu & I)/SMD(water)

Energy = -863.875441988

|    |            |             |             |
|----|------------|-------------|-------------|
| Cu | 0.20691000 | -0.17697400 | -0.55690300 |
| N  | 1.46260700 | -1.53036300 | 1.26759900  |
| N  | 2.26721800 | 0.15348500  | -1.07570100 |
| C  | 1.22777200 | -1.17428100 | 2.66377700  |
| H  | 1.40061500 | -0.10402200 | 2.81126600  |
| H  | 0.19264200 | -1.40045400 | 2.93729700  |
| C  | 1.15057200 | -2.94440500 | 1.06567200  |
| H  | 1.73073000 | -3.58196000 | 1.75549200  |
| H  | 0.08509700 | -3.12222500 | 1.24107500  |
| H  | 1.38203400 | -3.24592900 | 0.04148000  |
| C  | 2.85588600 | -1.25483500 | 0.89914000  |
| H  | 3.19107400 | -0.37203300 | 1.45109900  |
| H  | 3.51367400 | -2.08623300 | 1.20469900  |
| C  | 3.01930000 | -1.02570000 | -0.59508900 |
| H  | 2.65947900 | -1.89384000 | -1.15545200 |
| H  | 4.08748000 | -0.89499900 | -0.82925700 |
| C  | 2.85697200 | 1.38976400  | -0.53605400 |
| H  | 3.92949800 | 1.43145500  | -0.77770100 |
| H  | 2.35860500 | 2.25257700  | -0.98268200 |
| H  | 2.72989700 | 1.44723200  | 0.54557500  |
| C  | 2.35855800 | 0.21366600  | -2.54387400 |
| H  | 3.40329900 | 0.36008800  | -2.85594400 |
| H  | 1.98045700 | -0.71268300 | -2.97600400 |
| H  | 1.75964600 | 1.05218700  | -2.91043400 |
| H  | 1.89133100 | -1.73590200 | 3.34468400  |

|   |             |             |             |   |             |             |             |
|---|-------------|-------------|-------------|---|-------------|-------------|-------------|
| O | 0.10722200  | -1.63602800 | -1.80490800 | H | -0.32923600 | -3.02631400 | -1.60025900 |
| H | -0.76715800 | -2.04782200 | -1.74298000 | H | -1.65519800 | -3.15446600 | -0.43225600 |
| C | -2.55245200 | -0.05116600 | -1.36165300 | C | -2.86800600 | -0.89535100 | -1.04332400 |
| C | -1.71279400 | -0.41972700 | -0.31916700 | H | -3.04466500 | 0.11688700  | -1.42010400 |
| C | -2.13360000 | -1.19949300 | 0.74549900  | H | -3.60781200 | -1.55239600 | -1.53173500 |
| C | -3.46226100 | -1.64304700 | 0.75463600  | C | -3.08837200 | -0.93357600 | 0.46232200  |
| C | -4.33075200 | -1.29473000 | -0.27881500 | H | -2.83243600 | -1.92238200 | 0.85657700  |
| C | -3.87584900 | -0.49924800 | -1.33291500 | H | -4.15300900 | -0.75757700 | 0.68382900  |
| H | -2.19615700 | 0.56815100  | -2.17941500 | C | -2.79076200 | 1.41246400  | 0.97646500  |
| H | -1.46373400 | -1.45604900 | 1.55965800  | H | -3.82937200 | 1.47133300  | 1.33690900  |
| H | -3.80968900 | -2.25832600 | 1.57993200  | H | -2.18087400 | 2.12728400  | 1.53360800  |
| H | -5.36027700 | -1.63912500 | -0.26328000 | H | -2.76298100 | 1.69133800  | -0.07756400 |
| H | -4.54780900 | -0.22119300 | -2.14005900 | C | -2.28559200 | -0.23561000 | 2.61809500  |
| I | -0.44388200 | 2.01771500  | 0.65321100  | H | -3.31229700 | -0.17486700 | 3.01053900  |

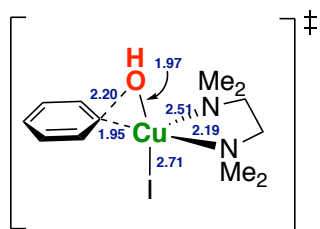

TS<sub>RE\_TMEDA</sub>

at M06-2X/6-31+G\*&SDD (for Cu & I)/SMD(water)

Energy = -863.7147470000001 A.U.

Thermal correction to Gibbs Free Energy =

0.282897 A.U.

Sum of electronic and thermal Free Energies =

-863.43185 A.U.

at M06-2X/6-311+G\*&SDD (for Cu & I)/SMD(water)

Energy = -863.870894618 A.U.

|    |             |             |             |
|----|-------------|-------------|-------------|
| Cu | -0.20984800 | -0.30940500 | 0.50354200  |
| N  | -1.50192200 | -1.28759300 | -1.41369500 |
| N  | -2.26034100 | 0.05698200  | 1.17784100  |
| C  | -1.17352100 | -0.78609600 | -2.74573800 |
| H  | -1.24112200 | 0.30508000  | -2.76172900 |
| H  | -0.15074700 | -1.07489800 | -3.00800200 |
| C  | -1.36785400 | -2.74395100 | -1.40315800 |
| H  | -2.00606700 | -3.20602800 | -2.17605400 |

|   |             |             |             |
|---|-------------|-------------|-------------|
| H | -1.89429400 | -1.23848800 | 2.79895800  |
| H | -1.66343300 | 0.49176600  | 3.14748500  |
| H | -1.85580500 | -1.19391500 | -3.51177400 |
| O | 0.01571900  | -1.95545400 | 1.42800900  |
| H | 0.24543700  | -2.66664500 | 0.80830100  |
| C | 2.48043400  | -0.42872200 | 1.51149600  |
| C | 1.66627300  | -0.85503700 | 0.47646300  |
| C | 2.13006300  | -1.40386100 | -0.70407700 |
| C | 3.51895700  | -1.49102600 | -0.86843100 |
| C | 4.38005400  | -1.04866700 | 0.13444700  |
| C | 3.86101100  | -0.51915600 | 1.31933800  |
| H | 2.06513800  | -0.02767300 | 2.43078500  |
| H | 1.45608100  | -1.73063500 | -1.48974000 |
| H | 3.91563300  | -1.90387400 | -1.79161700 |
| H | 5.45452900  | -1.12131300 | -0.00214600 |
| H | 4.52820400  | -0.17851200 | 2.10598500  |
| I | 0.45988400  | 2.10431100  | -0.52243800 |



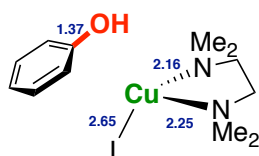

INT<sub>3</sub>\_TMEDA

at M06-2X/6-31+G\*&SDD (for Cu & I)/SMD(water)

Energy = -863.829736 A.U.

Thermal correction to Gibbs Free Energy =

0.283848 A.U.

Sum of electronic and thermal Free Energies =

-863.545888 A.U.

at M06-2X/6-311+G\*&SDD (for Cu & I)/SMD(water)

Energy = -863.984682712 A.U.

|    |             |             |             |
|----|-------------|-------------|-------------|
| Cu | -0.67264400 | 0.09469700  | -0.15641400 |
| N  | -2.14145700 | -0.93544600 | -1.36493600 |
| N  | -2.30907200 | 0.21134300  | 1.37648500  |
| C  | -2.11340900 | -0.49358700 | -2.76386500 |
| H  | -2.19026400 | 0.59609700  | -2.80694100 |
| H  | -1.16937400 | -0.79793400 | -3.22367900 |
| C  | -2.00749700 | -2.39614100 | -1.31778900 |
| H  | -2.88773200 | -2.88462600 | -1.76696200 |
| H  | -1.12105800 | -2.69685200 | -1.88121400 |
| H  | -1.89809000 | -2.74597600 | -0.28772600 |
| C  | -3.40689800 | -0.50771900 | -0.73848400 |
| H  | -3.59171600 | 0.52840400  | -1.03844600 |
| H  | -4.24366600 | -1.11411600 | -1.12215100 |
| C  | -3.37303500 | -0.61187100 | 0.78085300  |
| H  | -3.20042200 | -1.65045900 | 1.08016500  |
| H  | -4.35836600 | -0.31825800 | 1.18024800  |
| C  | -2.67371100 | 1.63222100  | 1.36218800  |
| H  | -3.60622700 | 1.80710800  | 1.92466800  |
| H  | -1.87069300 | 2.21611100  | 1.82074800  |
| H  | -2.80835900 | 1.98736900  | 0.33721100  |
| C  | -2.06885300 | -0.20706100 | 2.75829600  |
| H  | -2.96292400 | -0.04822200 | 3.38449700  |
| H  | -1.80672300 | -1.26757800 | 2.78693700  |
| H  | -1.24132600 | 0.37186600  | 3.17867500  |

|   |             |             |             |
|---|-------------|-------------|-------------|
| H | -2.94524900 | -0.93316600 | -3.33826700 |
| O | 0.57835100  | -1.82463000 | 1.74175800  |
| H | -0.18836200 | -2.03750100 | 1.17805000  |
| C | 2.86204800  | -1.22762200 | 1.58386500  |
| C | 1.70819500  | -1.71438400 | 0.96958600  |
| C | 1.71443600  | -2.06127700 | -0.38202000 |
| C | 2.88088700  | -1.89388400 | -1.12758900 |
| C | 4.03790600  | -1.39229100 | -0.53014100 |
| C | 4.02169900  | -1.06646600 | 0.82808300  |
| H | 2.83360200  | -0.96256600 | 2.63676000  |
| H | 0.80890300  | -2.44974100 | -0.84108400 |
| H | 2.87954300  | -2.15566700 | -2.18182400 |
| H | 4.94295800  | -1.25945100 | -1.11448400 |
| H | 4.91670900  | -0.67675300 | 1.30445300  |
| I | 1.17456200  | 1.98211200  | -0.36276300 |

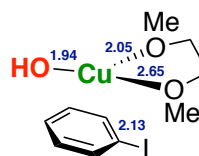

INT<sub>1</sub>\_DME

at M06-2X/6-31+G\*&SDD (for Cu & I)/SMD(water)

Energy = -824.887853 A.U.

Thermal correction to Gibbs Free Energy =

0.197285 A.U.

Sum of electronic and thermal Free Energies =

-824.690568 A.U.

at M06-2X/6-311+G\*&SDD (for Cu & I)/SMD(water)

Energy = -825.044271115 A.U.

|    |             |             |             |
|----|-------------|-------------|-------------|
| Cu | 0.74507900  | -1.23227100 | 0.01607000  |
| C  | 2.97984700  | 0.28895900  | 1.28739500  |
| H  | 2.60377800  | 1.31147900  | 1.14528000  |
| H  | 3.67742200  | 0.27661000  | 2.13327200  |
| C  | 3.66878800  | -0.20800400 | 0.04263900  |
| H  | 3.87698700  | -1.28322200 | 0.14203000  |
| H  | 4.62109400  | 0.32202200  | -0.09311600 |
| C  | -2.78830800 | -0.06389400 | -1.11153100 |

|   |             |             |             |    |             |             |             |
|---|-------------|-------------|-------------|----|-------------|-------------|-------------|
| C | -2.02037700 | 0.32204500  | -0.01579200 | Cu | 0.25798000  | -0.57123500 | -0.36329000 |
| C | -2.17500200 | -0.28455200 | 1.22898200  | C  | 3.02048900  | -0.32760800 | 1.25993500  |
| C | -3.11456200 | -1.30768100 | 1.37166300  | H  | 2.97726900  | 0.76369700  | 1.12799500  |
| C | -3.88781200 | -1.71167300 | 0.28326200  | H  | 3.82865400  | -0.56427100 | 1.96539400  |
| C | -3.72502700 | -1.08732000 | -0.95335200 | C  | 3.29311400  | -0.99915500 | -0.06088800 |
| H | -2.65558300 | 0.41355100  | -2.07704000 | H  | 3.21748500  | -2.09149400 | 0.03517700  |
| H | -1.57682200 | 0.03137000  | 2.07757700  | H  | 4.30017900  | -0.73974300 | -0.40985200 |
| H | -3.23744200 | -1.78599500 | 2.33901700  | C  | -2.47045900 | -0.47922900 | -1.15207500 |
| H | -4.61572000 | -2.50891400 | 0.39891800  | C  | -1.65300300 | -0.32353600 | -0.04253500 |
| H | -4.32402000 | -1.39602200 | -1.80510200 | C  | -2.07657300 | -0.54195900 | 1.25899200  |
| I | -0.55761000 | 1.84733700  | -0.25370100 | C  | -3.39510000 | -0.96886600 | 1.44998000  |
| O | 1.88534400  | -0.58128200 | 1.58508100  | C  | -4.24609300 | -1.14885500 | 0.35919000  |
| O | 2.81689900  | 0.01863600  | -1.06757700 | C  | -3.78436400 | -0.90565500 | -0.93529100 |
| C | 3.17575000  | -0.75685600 | -2.19767100 | H  | -2.10724200 | -0.28292700 | -2.15576200 |
| H | 2.46456500  | -0.52099300 | -2.99165100 | H  | -1.41443200 | -0.38842400 | 2.10488100  |
| H | 4.19254800  | -0.51305000 | -2.53234300 | H  | -3.74984300 | -1.15303200 | 2.46003800  |
| H | 3.12077700  | -1.82835800 | -1.96337600 | H  | -5.26987800 | -1.47347100 | 0.51764100  |
| C | 1.19936000  | -0.19876800 | 2.77429300  | H  | -4.44368500 | -1.04149100 | -1.78783700 |
| H | 0.43040600  | -0.94987700 | 2.95831200  | I  | -0.12290000 | 1.92911100  | -0.23798600 |
| H | 1.90454500  | -0.17521600 | 3.61284600  | O  | 1.78236100  | -0.80099400 | 1.76505000  |
| H | 0.74070200  | 0.78915400  | 2.64970600  | O  | 2.33672700  | -0.54061400 | -1.01329400 |
| O | -0.16262100 | -2.14545800 | -1.43940600 | C  | 2.54187100  | -1.11364100 | -2.30138100 |
| H | 0.52989100  | -2.64427000 | -1.89829400 | H  | 1.75511500  | -0.72935700 | -2.95274200 |

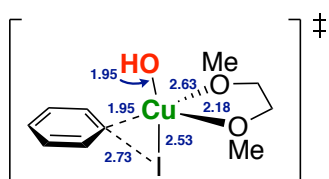

TS<sub>OA\_DME</sub>

at M06-2X/6-31+G\*&SDD (for Cu & I)/SMD(water)

Energy = -824.854112 A.U.

Thermal correction to Gibbs Free Energy =

0.201554 A.U.

Sum of electronic and thermal Free Energies =

-824.652558 A.U.

at M06-2X/6-311+G\*&SDD (for Cu & I)/SMD(water)

Energy = -825.010388206 A.U.

|    |             |             |             |    |             |             |             |
|----|-------------|-------------|-------------|----|-------------|-------------|-------------|
| Cu | 0.25798000  | -0.57123500 | -0.36329000 | Cu | 0.25798000  | -0.57123500 | -0.36329000 |
| C  | 3.02048900  | -0.32760800 | 1.25993500  | C  | 3.02048900  | -0.32760800 | 1.25993500  |
| H  | 2.97726900  | 0.76369700  | 1.12799500  | H  | 2.97726900  | 0.76369700  | 1.12799500  |
| H  | 3.82865400  | -0.56427100 | 1.96539400  | H  | 3.82865400  | -0.56427100 | 1.96539400  |
| C  | 3.29311400  | -0.99915500 | -0.06088800 | C  | 3.29311400  | -0.99915500 | -0.06088800 |
| H  | 3.21748500  | -2.09149400 | 0.03517700  | H  | 3.21748500  | -2.09149400 | 0.03517700  |
| H  | 4.30017900  | -0.73974300 | -0.40985200 | H  | 4.30017900  | -0.73974300 | -0.40985200 |
| C  | -2.47045900 | -0.47922900 | -1.15207500 | C  | -2.47045900 | -0.47922900 | -1.15207500 |
| C  | -1.65300300 | -0.32353600 | -0.04253500 | C  | -1.65300300 | -0.32353600 | -0.04253500 |
| C  | -2.07657300 | -0.54195900 | 1.25899200  | C  | -2.07657300 | -0.54195900 | 1.25899200  |
| C  | -3.39510000 | -0.96886600 | 1.44998000  | C  | -3.39510000 | -0.96886600 | 1.44998000  |
| C  | -4.24609300 | -1.14885500 | 0.35919000  | C  | -4.24609300 | -1.14885500 | 0.35919000  |
| H  | -2.10724200 | -0.28292700 | -2.15576200 | H  | -2.10724200 | -0.28292700 | -2.15576200 |
| H  | -1.41443200 | -0.38842400 | 2.10488100  | H  | -1.41443200 | -0.38842400 | 2.10488100  |
| H  | -3.74984300 | -1.15303200 | 2.46003800  | H  | -3.74984300 | -1.15303200 | 2.46003800  |
| H  | -5.26987800 | -1.47347100 | 0.51764100  | H  | -5.26987800 | -1.47347100 | 0.51764100  |
| H  | -4.44368500 | -1.04149100 | -1.78783700 | H  | -4.44368500 | -1.04149100 | -1.78783700 |
| I  | -0.12290000 | 1.92911100  | -0.23798600 | I  | -0.12290000 | 1.92911100  | -0.23798600 |
| O  | 1.78236100  | -0.80099400 | 1.76505000  | O  | 1.78236100  | -0.80099400 | 1.76505000  |
| O  | 2.33672700  | -0.54061400 | -1.01329400 | O  | 2.33672700  | -0.54061400 | -1.01329400 |
| C  | 2.54187100  | -1.11364100 | -2.30138100 | C  | 2.54187100  | -1.11364100 | -2.30138100 |
| H  | 1.75511500  | -0.72935700 | -2.95274200 | H  | 1.75511500  | -0.72935700 | -2.95274200 |
| H  | 3.52394300  | -0.81630500 | -2.68559400 | H  | 3.52394300  | -0.81630500 | -2.68559400 |
| H  | 2.48160800  | -2.20710400 | -2.25094600 | H  | 2.48160800  | -2.20710400 | -2.25094600 |
| C  | 1.41032600  | -0.12567500 | 2.95522400  | C  | 1.41032600  | -0.12567500 | 2.95522400  |
| H  | 0.50518000  | -0.60265600 | 3.33403400  | H  | 0.50518000  | -0.60265600 | 3.33403400  |
| H  | 2.20476200  | -0.20957300 | 3.70814900  | H  | 2.20476200  | -0.20957300 | 3.70814900  |
| H  | 1.21443200  | 0.93576300  | 2.75427800  | H  | 1.21443200  | 0.93576300  | 2.75427800  |
| O  | 0.03375900  | -2.48914000 | -0.59803200 | O  | 0.03375900  | -2.48914000 | -0.59803200 |
| H  | 0.94469700  | -2.82563700 | -0.59287800 | H  | 0.94469700  | -2.82563700 | -0.59287800 |

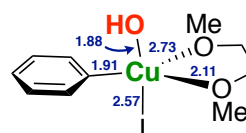

INT<sub>2\_DME</sub>

at M06-2X/6-31+G\*&SDD (for Cu & I)/SMD(water)

Energy = -824.854442 A.U.

Thermal correction to Gibbs Free Energy =

0.201685 A.U.

Sum of electronic and thermal Free Energies =

-824.652757 A.U.

at M06-2X/6-311+G\*&SDD (for Cu & I)/SMD(water)

Energy = -825.010022038 A.U.

|    |             |             |             |
|----|-------------|-------------|-------------|
| Cu | 0.22503700  | -0.58321600 | -0.36060400 |
| C  | 2.99823400  | -0.37907600 | 1.26407000  |
| H  | 2.98517800  | 0.71059500  | 1.11434300  |
| H  | 3.80262200  | -0.62764900 | 1.96969300  |
| C  | 3.24527200  | -1.07929400 | -0.04639800 |
| H  | 3.15171200  | -2.16833400 | 0.06850300  |
| H  | 4.25148300  | -0.84279000 | -0.41245000 |
| C  | -2.49420700 | -0.56912400 | -1.15556100 |
| C  | -1.66889200 | -0.47895200 | -0.04849900 |
| C  | -2.10607700 | -0.60600000 | 1.25758300  |
| C  | -3.46994900 | -0.84811800 | 1.46006300  |
| C  | -4.33945400 | -0.94829700 | 0.37361800  |
| C  | -3.85362200 | -0.81067000 | -0.92735200 |
| H  | -2.10977300 | -0.45578000 | -2.16430300 |
| H  | -1.42543100 | -0.51778300 | 2.09834900  |
| H  | -3.84352200 | -0.95297300 | 2.47467700  |
| H  | -5.39649000 | -1.13134300 | 0.54063500  |
| H  | -4.52729000 | -0.88628200 | -1.77618100 |
| I  | -0.02059900 | 1.95654100  | -0.25979500 |
| O  | 1.74894000  | -0.80899800 | 1.78059500  |
| O  | 2.28578200  | -0.61984300 | -0.99777400 |
| C  | 2.48192600  | -1.19947400 | -2.28616900 |
| H  | 1.69737800  | -0.80893000 | -2.93623200 |
| H  | 3.46605600  | -0.91178300 | -2.67122600 |
| H  | 2.41116400  | -2.29202900 | -2.23158900 |
| C  | 1.39909400  | -0.09914100 | 2.95766100  |
| H  | 0.47745800  | -0.53656800 | 3.34449900  |
| H  | 2.18972900  | -0.19637400 | 3.71294300  |
| H  | 1.24042200  | 0.96427700  | 2.73618700  |
| O  | -0.01655700 | -2.47303300 | -0.56051000 |
| H  | 0.89568400  | -2.80577300 | -0.51378900 |

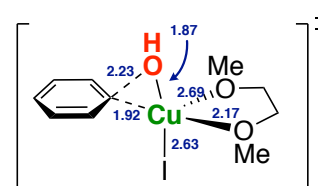

TS<sub>RE\_DME</sub>

at M06-2X/6-311+G\*&SDD (for Cu & I)/SMD(water)

Energy = -824.851813 A.U.

Thermal correction to Gibbs Free Energy =

0.199931 A.U.

Sum of electronic and thermal Free Energies =

-824.651882 A.U.

at M06-2X/6-311+G\*&SDD (for Cu & I)/SMD(water)

Energy = -825.006833789 A.U.

|    |             |             |             |
|----|-------------|-------------|-------------|
| Cu | 0.22405600  | -0.51043900 | -0.55196300 |
| C  | 2.86070100  | -0.79297700 | 1.37612700  |
| H  | 3.11003800  | 0.27829600  | 1.38001800  |
| H  | 3.52351700  | -1.30880500 | 2.08465100  |
| C  | 3.06588400  | -1.35764400 | -0.00485300 |
| H  | 2.70087500  | -2.39244100 | -0.06821000 |
| H  | 4.13426200  | -1.34068500 | -0.25221400 |
| C  | -2.53232500 | -0.52390900 | -1.24048300 |
| C  | -1.64177500 | -0.85422800 | -0.23598600 |
| C  | -1.99613000 | -1.17838300 | 1.05887300  |
| C  | -3.35847500 | -1.11406500 | 1.37813400  |
| C  | -4.29662000 | -0.75614300 | 0.41028000  |
| C  | -3.88513400 | -0.46660000 | -0.89289000 |
| H  | -2.19887200 | -0.30012700 | -2.24866800 |
| H  | -1.25706600 | -1.46360400 | 1.80095500  |
| H  | -3.67430400 | -1.34835200 | 2.39062300  |
| H  | -5.35007400 | -0.70956600 | 0.66793000  |
| H  | -4.61372000 | -0.19306900 | -1.65059500 |
| I  | 0.06396300  | 2.07240800  | -0.06372800 |
| O  | 1.50711700  | -0.96956400 | 1.76274800  |
| O  | 2.35991300  | -0.54695800 | -0.94305200 |
| C  | 2.62477500  | -0.93562700 | -2.28871900 |
| H  | 2.02747900  | -0.28812700 | -2.93300700 |
| H  | 3.68980500  | -0.80295600 | -2.50778200 |

|   |             |             |             |
|---|-------------|-------------|-------------|
| H | 2.34279900  | -1.98265700 | -2.44904000 |
| C | 1.22425300  | -0.29175500 | 2.97591900  |
| H | 0.16548000  | -0.43459400 | 3.19919000  |
| H | 1.82901700  | -0.70217500 | 3.79507300  |
| H | 1.43259500  | 0.78135700  | 2.87732800  |
| O | -0.12439100 | -2.28448400 | -1.03410100 |
| H | -0.08153400 | -2.79136900 | -0.20489700 |

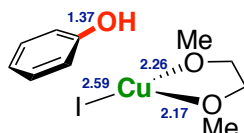

INT<sub>3</sub>\_DME

at M06-2X/6-31+G\*&SDD (for Cu & I)/SMD(water)

Energy = -824.964148 A.U.

Thermal correction to Gibbs Free Energy =

0.202519 A.U.

Sum of electronic and thermal Free Energies =

-824.761629 A.U.

at M06-2X/6-311+G\*&SDD (for Cu & I)/SMD(water)

Energy = -825.118493765 A.U.

|    |            |             |             |
|----|------------|-------------|-------------|
| Cu | 0.83459700 | 0.65678100  | 0.00786300  |
| C  | 3.40947000 | -0.55303300 | 0.95700900  |
| H  | 3.72440000 | 0.42119100  | 1.35328300  |
| H  | 4.03098300 | -1.34082300 | 1.39956500  |
| C  | 3.53023700 | -0.57609000 | -0.54592000 |
| H  | 3.19919400 | -1.54205200 | -0.95077800 |

|   |             |             |             |
|---|-------------|-------------|-------------|
| H | 4.57345400  | -0.40833700 | -0.84070200 |
| C | -1.59105200 | -2.00781900 | -1.52137400 |
| C | -0.70870800 | -2.12428300 | -0.44628800 |
| C | -1.19157800 | -2.19525100 | 0.86233500  |
| C | -2.56473400 | -2.12294600 | 1.09270900  |
| C | -3.45671100 | -1.99529600 | 0.02687500  |
| C | -2.96201800 | -1.94379100 | -1.27826400 |
| H | -1.19468600 | -1.95200900 | -2.53129200 |
| H | -0.49137700 | -2.30616600 | 1.68648000  |
| H | -2.93578700 | -2.16958000 | 2.11263000  |
| H | -4.52504500 | -1.93823900 | 0.21066700  |
| H | -3.64690700 | -1.84487700 | -2.11559200 |
| I | -1.45048900 | 1.86488600  | 0.12403000  |
| O | 2.03912700  | -0.76907900 | 1.28977900  |
| O | 2.70828300  | 0.46513900  | -1.06302700 |
| C | 2.57583900  | 0.40764100  | -2.47933900 |
| H | 1.95388900  | 1.25306200  | -2.77689700 |
| H | 3.56133300  | 0.48522500  | -2.95303500 |
| H | 2.09539700  | -0.53127100 | -2.77903000 |
| C | 1.78971600  | -0.63490800 | 2.68537400  |
| H | 0.71437900  | -0.73819400 | 2.83607300  |
| H | 2.32365000  | -1.41455500 | 3.24056800  |
| H | 2.11466000  | 0.35301400  | 3.03082600  |
| O | 0.63456300  | -2.17342800 | -0.71785000 |
| H | 1.13651500  | -1.91839400 | 0.08570700  |

## 6. Reference

- S1. (a) Octa-*O*-methylglucoside was prepared according to the protocol in the following literature: J.W. Timmermans, P.M.P. Bogaert, D. Dewit and J.F.G. Vliegientha, *J. Carbohydr. Chem.*, 1997, **16**, 1145; (b) Characterized by <sup>1</sup>H NMR analysis with the comparison of spectrum in the following literature: H. Wang, L. Sun, S. Glazebnik and K. Zhao, *Tetrahedron Lett.*, 1995, **36**, 2953.
- S2. (a) L. M. Huffman and S. S. Stahl, *J. Am. Chem. Soc.*, 2008, **130**, 9196; (b) G. O. Jones, P. Liu, K. N. Houk and S. L. Buchwald, *J. Am. Chem. Soc.*, 2010, **132**, 6205; (c) H. Z. Yu, Y. Y. Jiang, Y. Fu and L. Liu, *J. Am. Chem. Soc.*, 2010, **132**, 18078; (d) A. Casitas, A. E. King, T. Parella, M. Costas, S. S. Stahl and X. Ribas *Chem. Sci.*, 2010, **1**, 326; (e) S. Sung, D. Sale, D. C. Braddock, A. Armstrong, C. Brennan and R. P. Davies, *ACS Catal.*, 2016, **6**, 3965; (f) S. Bhunia, G. G. Pawar, S. V. Kumar, Y. Jiang and D. Ma, *Angew. Chem. Int. Ed.*, 2017, **56**, 16136; (g) R. Giri, A. Brusoe, K. Troshin, J. Y. Wang, M. Font and J. F. Hartwig, *J. Am. Chem. Soc.*, 2018, **140**, 793; (h) D. V. Morarji and K. K. Gurjar, *Organometallics*, 2019, **38**, 2502; (i) Z. Chen, Y. Jiang, L. Zhang, Y. Guo and D. Ma, *J. Am. Chem. Soc.*, 2019, **141**, 3541.
- S3. S. Golla, S. Poshala, R. Pawar and H. P. Kokatla, *Tetrahedron Lett.*, 2020, **61**, 151539.
- S4. K. W. Anderson, T. Ikawa, R. E. Tundel and S. L. Buchwald, *J. Am. Chem. Soc.*, 2006, **128**, 10694.
- S5. P. Gogoi, G. K. Sarmah and D. Konwar, *J. Org. Chem.*, 2004, **69**, 5153.
- S6. C. Y. Lee, S. J. Ahn and C. H. Cheon, *J. Org. Chem.*, 2013, **78**, 12154.
- S7. H.-M. Yang, M.-L. Liu, J.-W. Tu, E. Miura-Stempel, M. G. Cambell and G. J. Chuang, *J. Org. Chem.*, 2020, **85**, 2040.
- S8. A. Pilevar, A. Hosseini, M. Šekutor, H. Hausmann, J. Becker, K. Turke and P. R. Schreiner, *J. Org. Chem.*, 2018, **83**, 10070.
- S9. C. Zhu, R. Wang and J. R. Falck, *Org. Lett.*, 2012, **14**, 3494.
- S10. F. Dollé, L. Dolci, H. Valette, F. Hinnen, F. Vaufrey, I. Guenther, C. Fuseau, C. Coulon, M. Bottlaender and C. Crouzel, *J. Med. Chem.*, 1999, **42**, 2251.
- S11. N. Guimond, S. I. Gorelsky and K. Fagnou, *J. Am. Chem. Soc.*, 2011, **133**, 6449.
- S12. W. F. Vernier and L. Gomez, *Tetrahedron Lett.*, 2017, **58**, 4587.
- S13. Gaussian 16, Revision B.01, M. J. Frisch, G. W. Trucks, H. B. Schlegel, G. E. Scuseria, M. A. Robb, J. R. Cheeseman, G. Scalmani, V. Barone, G. A. Petersson, H. Nakatsuji, X. Li, M. Caricato, A. V. Marenich, J. Bloino, B. G. Janesko, R. Gomperts, B. Mennucci, H. P. Hratchian, J. V. Ortiz, A. F. Izmaylov, J. L. Sonnenberg, D. Williams-Young, F. Ding, F. Lipparini, F. Egidi, J. Goings, B. Peng, A. Petrone, T. Henderson, D. Ranasinghe, V. G. Zakrzewski, J. Gao, N. Rega, G. Zheng, W. Liang, M. Hada, M. Ehara, K. Toyota, R. Fukuda, J. Hasegawa, M. Ishida, T. Nakajima, Y. Honda, O. Kitao, H. Nakai, T. Vreven, K. Throssell, J. A. Montgomery, Jr., J. E. Peralta, F. Ogliaro, M. J. Bearpark, J. J. Heyd, E. N. Brothers, K. N. Kudin, V. N. Staroverov, T. A. Keith, R. Kobayashi, J. Normand, K. Raghavachari, A. P. Rendell, J. C. Burant, S. S. Iyengar, J. Tomasi, M. Cossi, J. M.

- Millam, M. Klene, C. Adamo, R. Cammi, J. W. Ochterski, R. L. Martin, K. Morokuma, O. Farkas, J. B. Foresman and D. J. Fox, Gaussian, Inc., Wallingford CT, 2016.
- S14. (a) Y. Zhao and D. G. Truhlar, *Theor. Chem. Acc.*, 2008, **120**, 215; (b) Y. Zhao and D. G. Truhlar, *Acc. Chem. Res.*, 2008, **41**, 157.
- S15. (a) P. Fuentealba, H. Preuss, H. Stoll and L. V. Szentpaly, *Chem. Phys. Lett.*, 1982, **89**, 418. (b) L. V. Szentpaly, P. Fuentealba, H. Preuss and H. Stoll, *Chem. Phys. Lett.*, 1982, **93**, 555.
- S16. M. J. Frisch, J. A. Pople and J. S. Binkley, *J. Chem. Phys.*, **1984**, *80*, 3265.
- S17. A. V. Marenich, C. J. Cramer and D. G. Truhlar, *J. Phys. Chem., B* 2009, **113**, 6378.
- S18. (a) K. Fukui, *Acc. Chem. Res.*, **1981**, *14*, 363. (b) K. Ishida, K. Morokuma and A. Komornicki, *J. Chem. Phys.*, **1977**, *66*, 2153. (c) C. Gonzalez and H. B. Schlegel, *J. Chem. Phys.*, **1989**, *90*, 2154. (d) H. B. Schlegel and C. Gonzalez, *J. Phys. Chem.*, **1990**, *94*, 5523.

## 7. Copies for NMR spectra

### 4-Acetylphenol (2a)

#### $^1\text{H}$ NMR

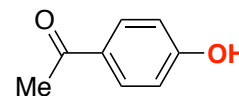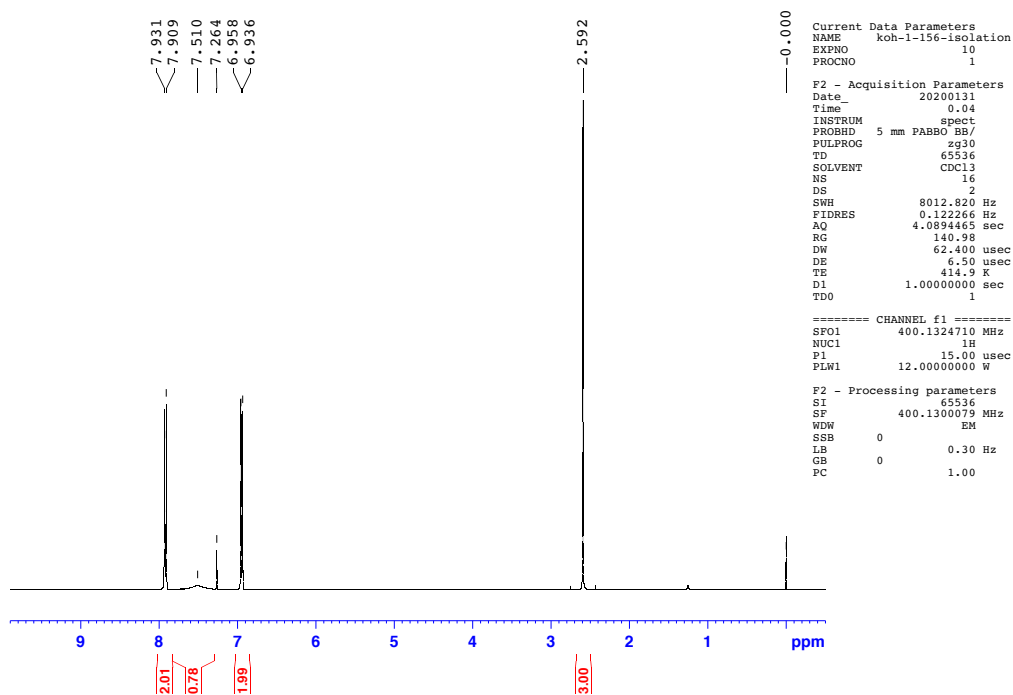

#### $^{13}\text{C}$ NMR

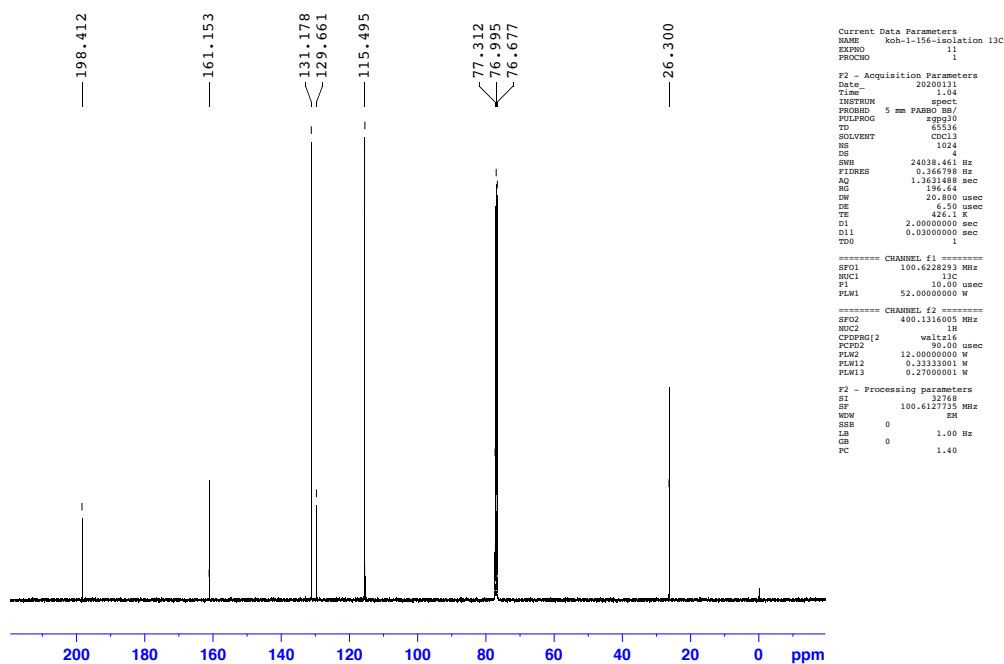

# 3-Acetylphenol (2b)

## <sup>1</sup>H NMR

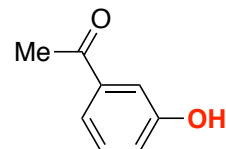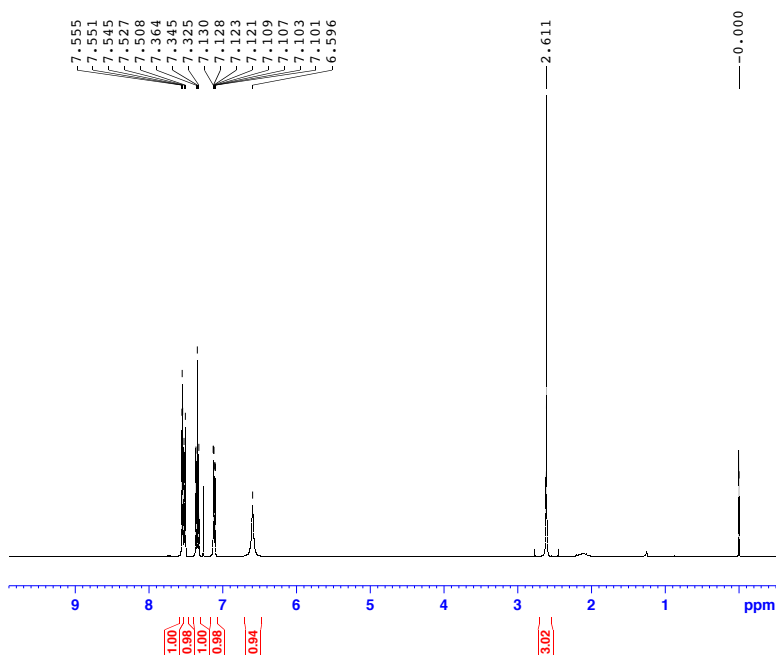

```

Current Data Parameters
NAME      koh-2-003-isolation
EXPNO    10
PROCNO   1

F2 - Acquisition Parameters
Date_    20200131
Time     1.08
INSTRUM  spect
PROBHD   5 mm PABBO BB/
PULPROG  zg30
TD       65536
SOLVENT  CDCl3
NS       16
DS       2
SWH      8012.820 Hz
FIDRES   0.122266 Hz
AQ       4.0894465 sec
RG       154.67
DW       62.400 usec
DE       6.50 usec
TE       427.0 K
D1       1.0000000 sec
TDO      1

===== CHANNEL f1 =====
SFO1    400.1324710 MHz
NUC1     1H
P1       15.00 usec
PLM1    12.00000000 W

F2 - Processing parameters
SI       65536
SF       400.1300002 MHz
WDW      EM
SSB      0
LB       0.30 Hz
GB       0
PC       1.00
    
```

## <sup>13</sup>C NMR

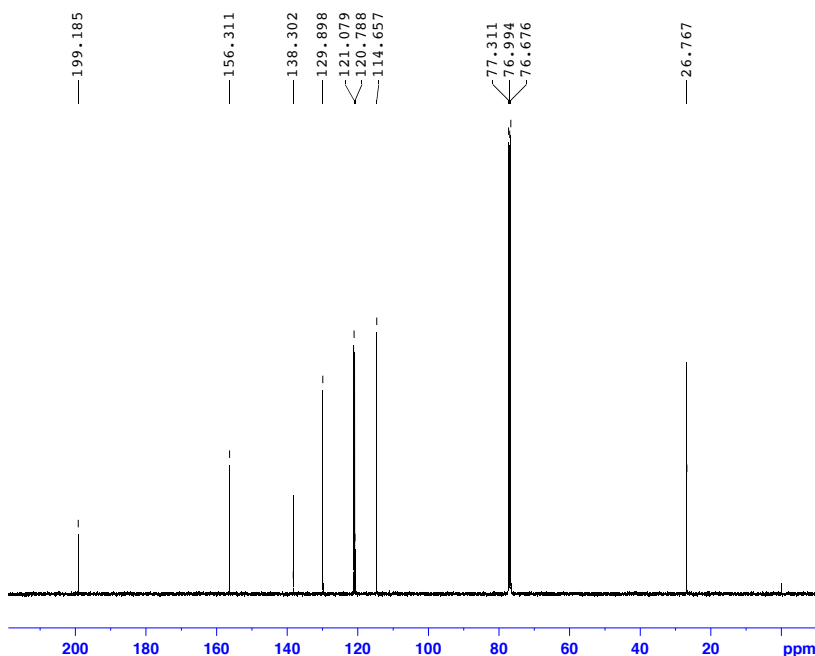

```

Current Data Parameters
NAME      koh-2-003-isolation 13C
EXPNO    13
PROCNO   1

F2 - Acquisition Parameters
Date_    20200131
Time     2.07
INSTRUM  spect
PROBHD   5 mm PABBO BB/
PULPROG  zgpg30
TD       65536
SOLVENT  CDCl3
NS       1024
DS       4
SWH      24038.461 Hz
FIDRES   0.366798 Hz
AQ       1.3631488 sec
RG       196.64
DW       20.800 usec
DE       6.50 usec
TE       429.1 K
D1       2.0000000 sec
D11      0.03000000 sec
TDO      1

===== CHANNEL f1 =====
SFO1    100.628293 MHz
NUC1     13C
P1       10.00 usec
PLM1    52.00000000 W

===== CHANNEL f2 =====
SFO2    400.1316005 MHz
NUC2     1H
CPDPRG2  waltz16
PCPD2   90.00 usec
PULPD2  12.00000000 W
PLM12   0.33330001 W
PLM13   0.27000001 W

F2 - Processing parameters
SI       32768
SF       100.6127725 MHz
WDW      EM
SSB      0
LB       1.00 Hz
GB       0
PC       1.40
    
```



# 2-Acetylphenol (2c)

## <sup>1</sup>H NMR

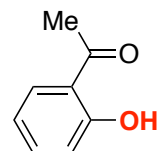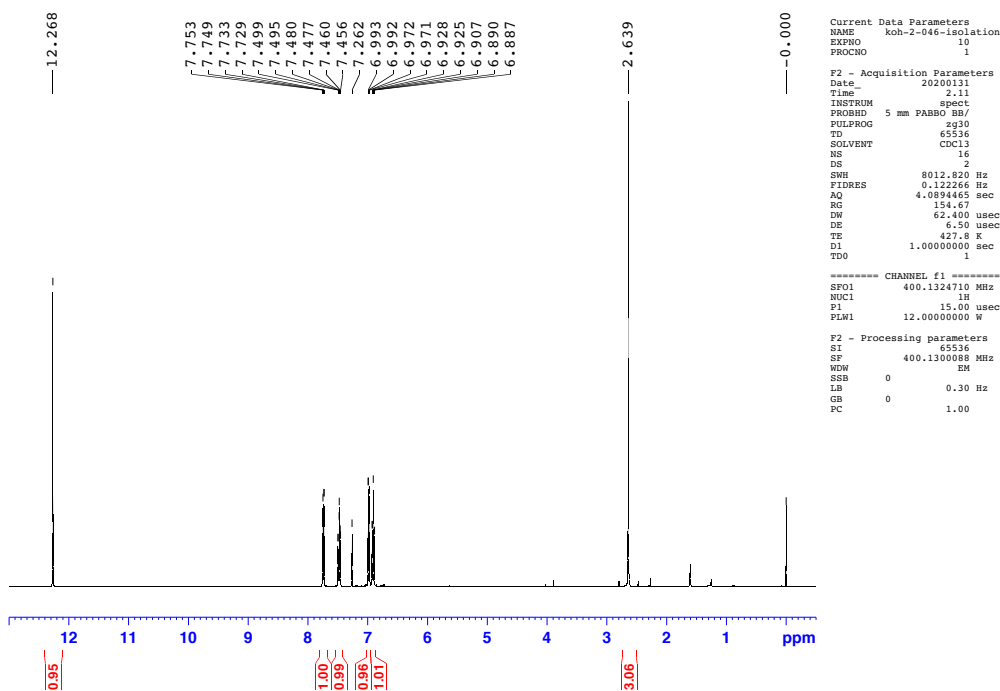

## <sup>13</sup>C NMR

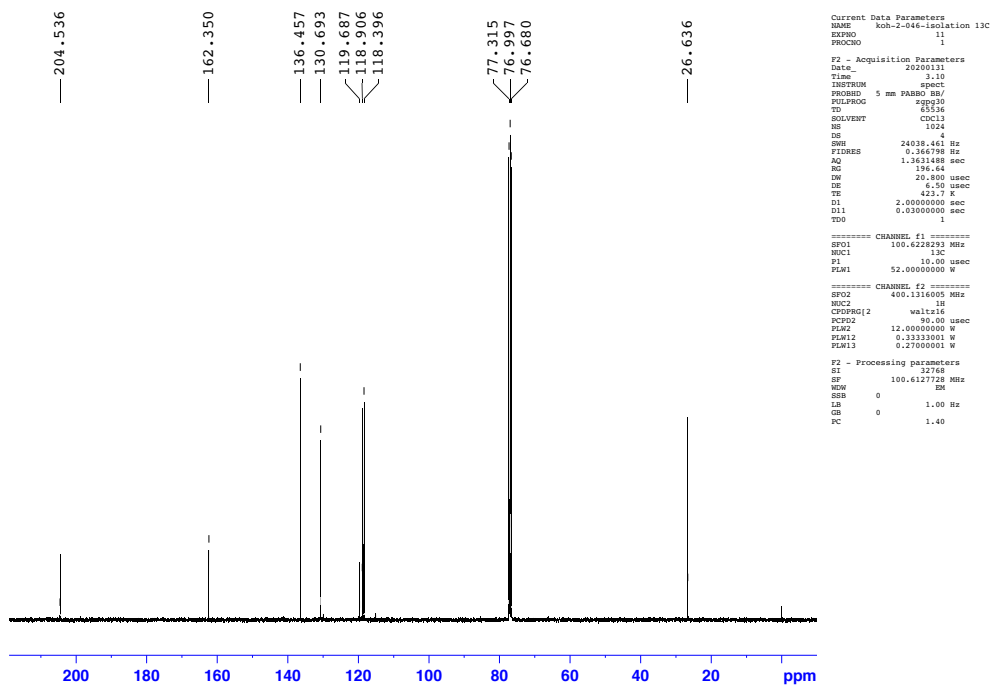

# Phenol (2d)

## <sup>1</sup>H NMR

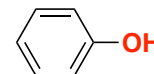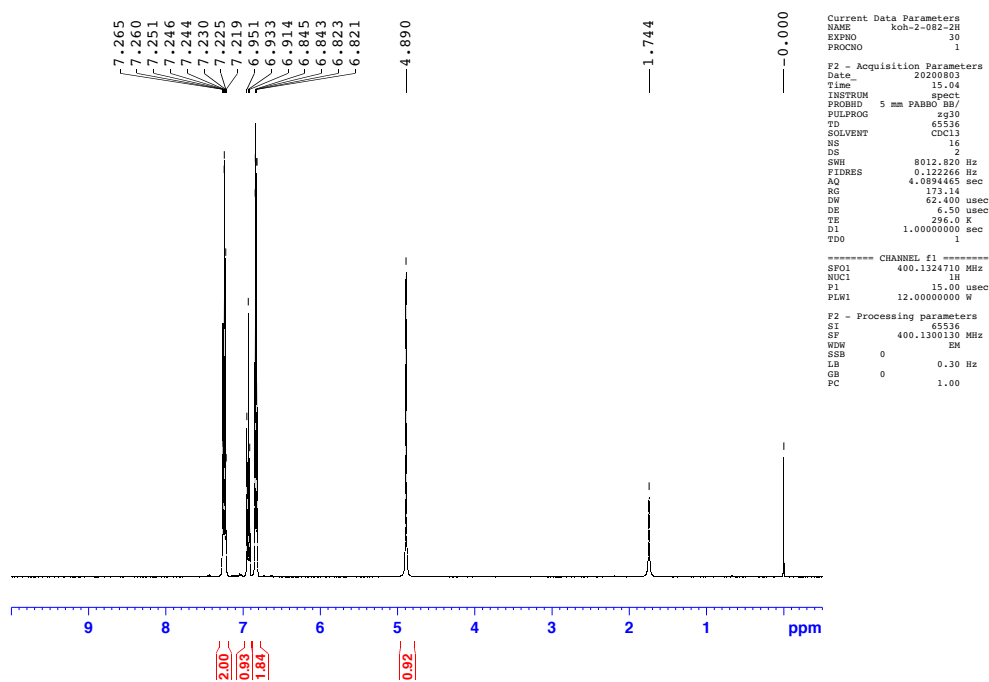

## <sup>13</sup>C NMR

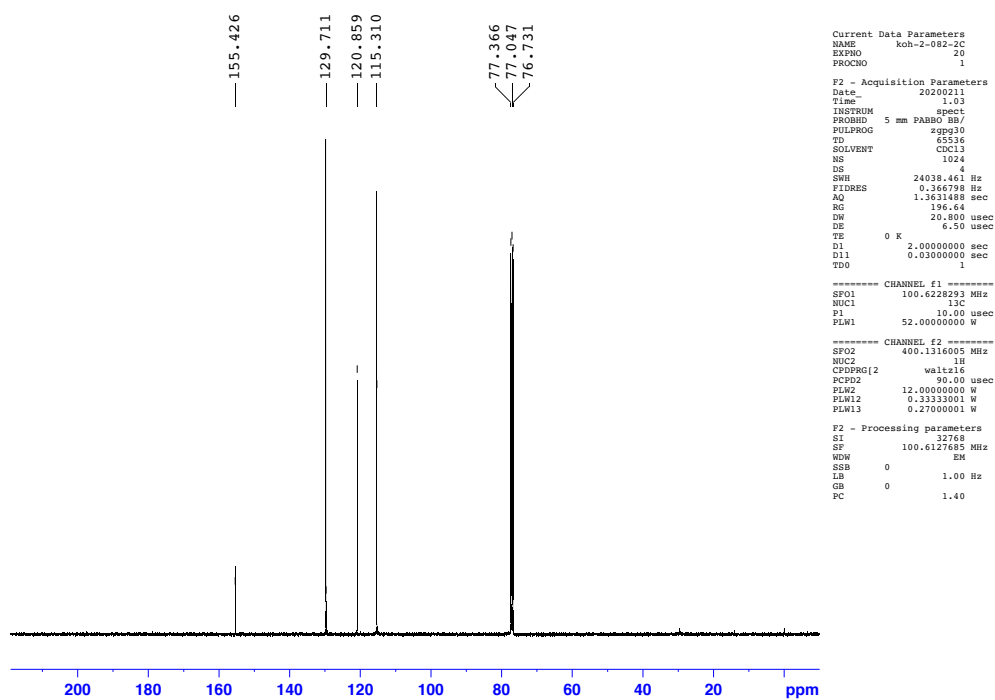

# 4-Methoxyphenol (2e)

## <sup>1</sup>H NMR

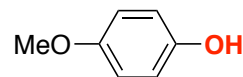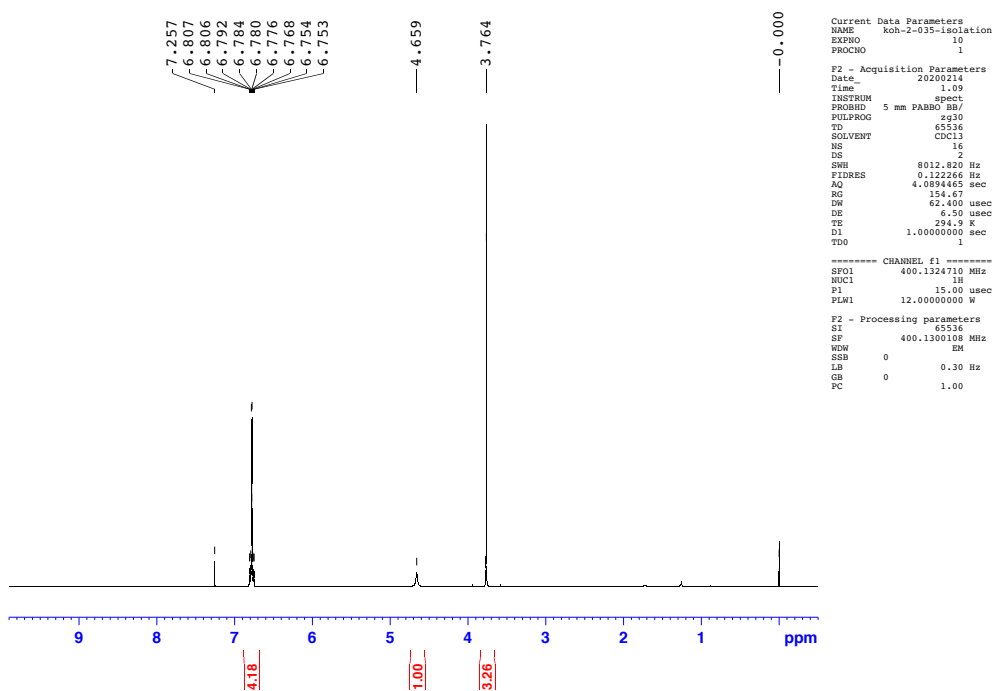

## <sup>13</sup>C NMR

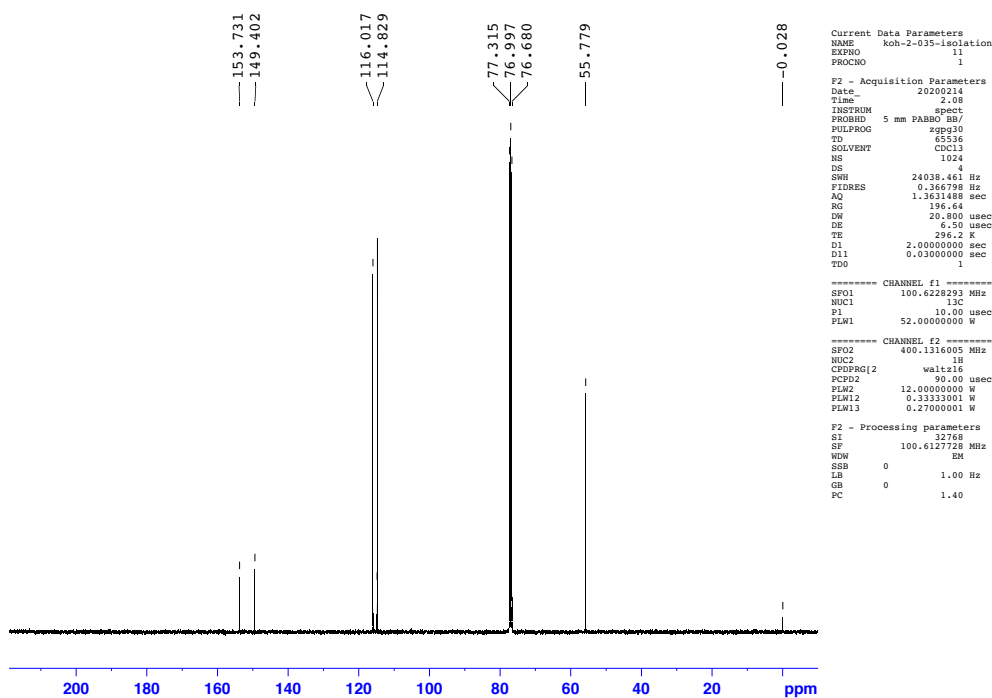

# 3-Methoxyphenol (2f)

## <sup>1</sup>H NMR

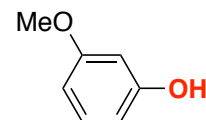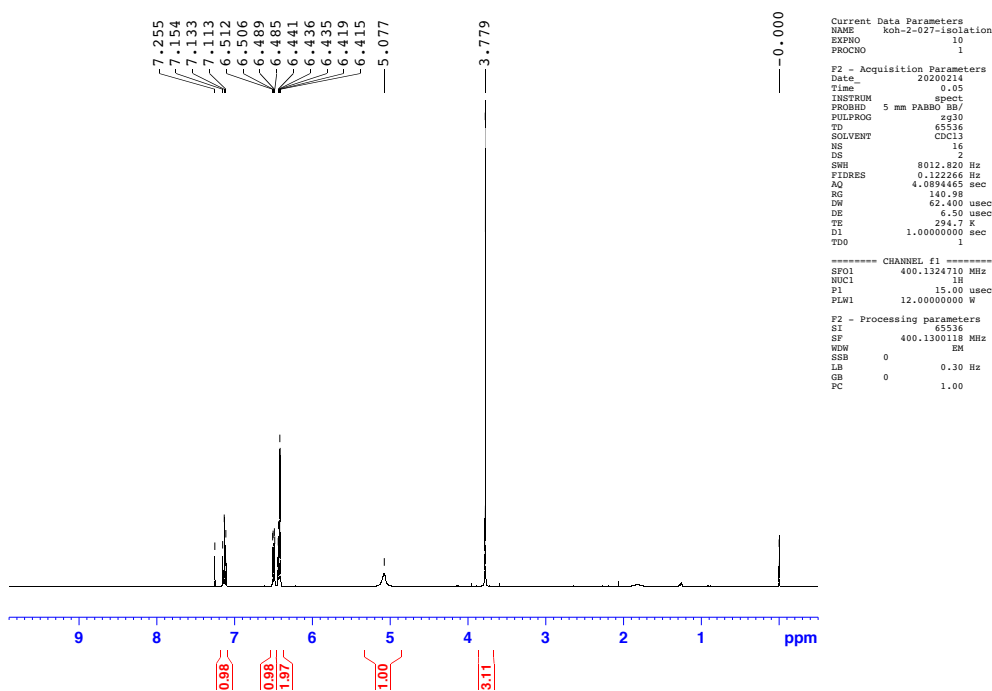

## <sup>13</sup>C NMR

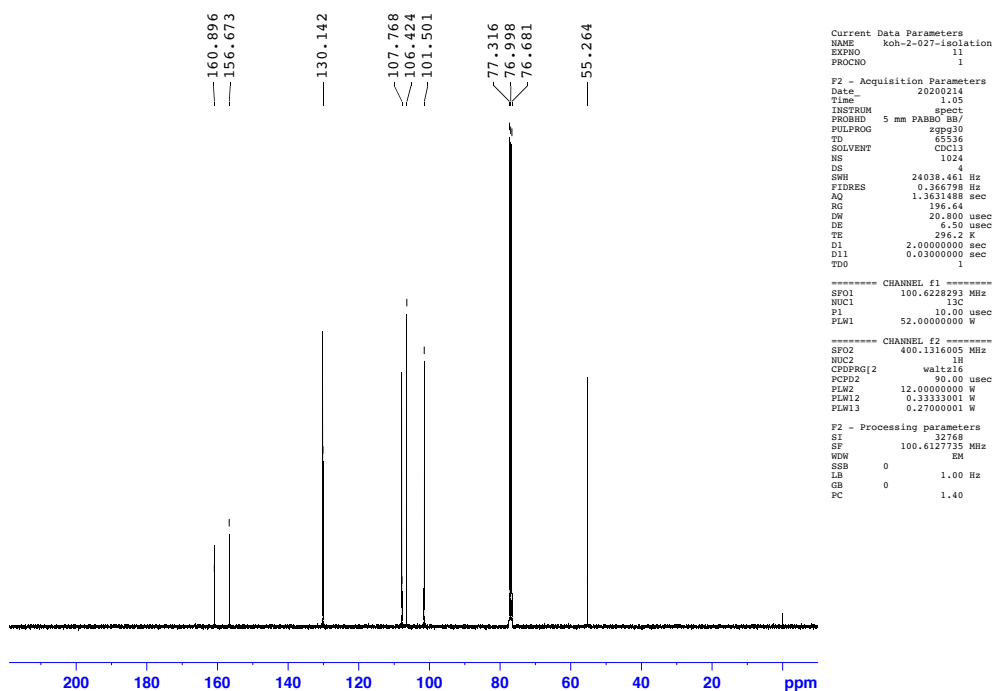

# 2-Methoxyphenol (2g)

## <sup>1</sup>H NMR

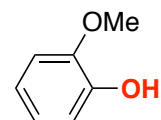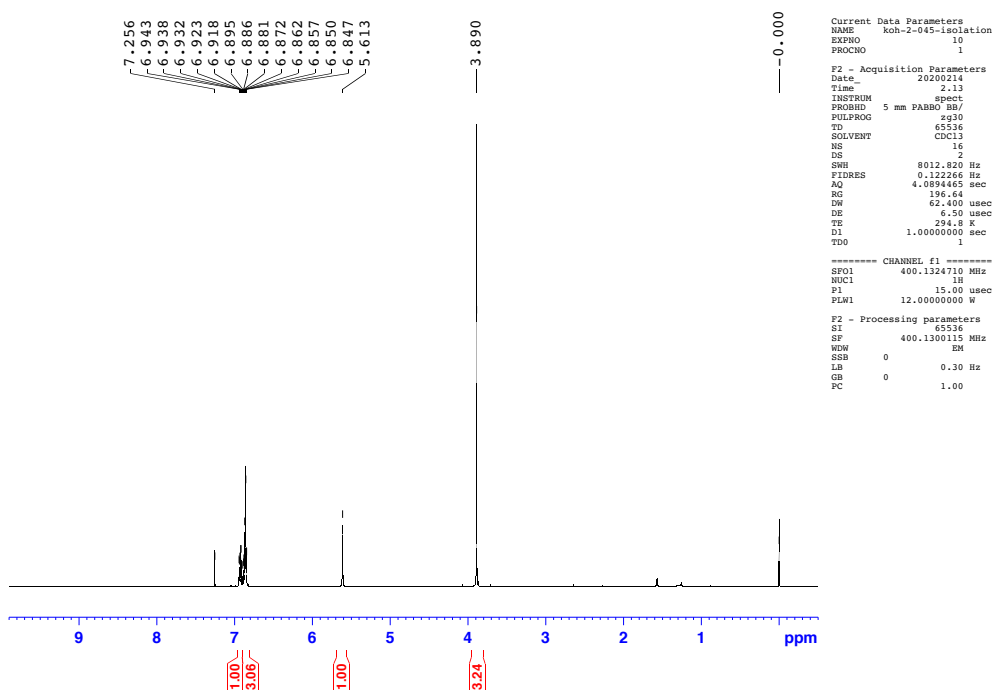

## <sup>13</sup>C NMR

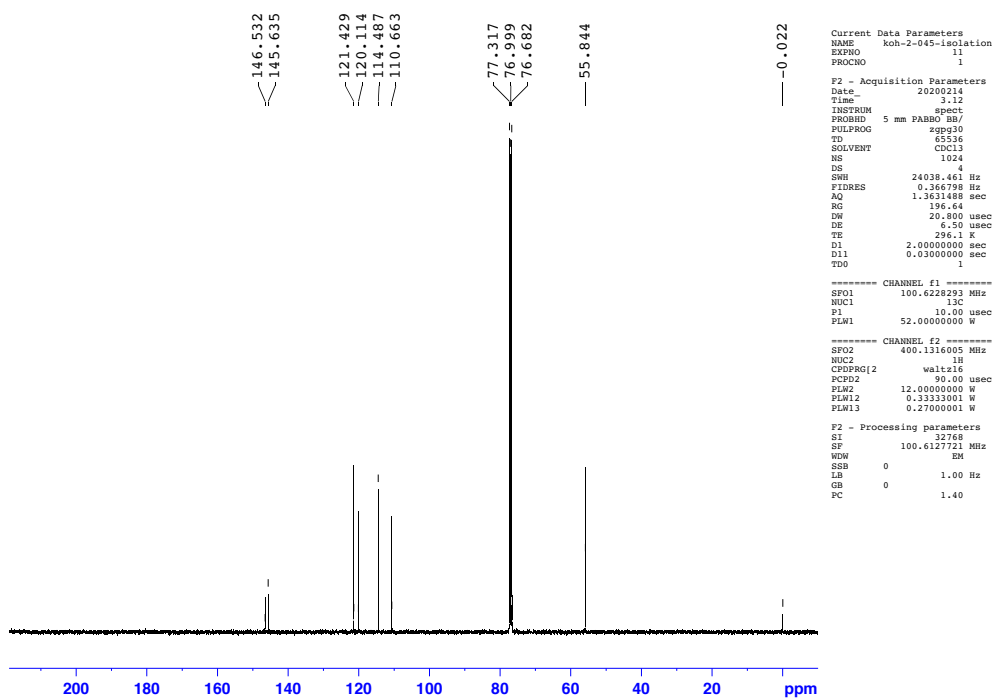

# 4-Aminophenol (2h)

## <sup>1</sup>H NMR

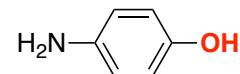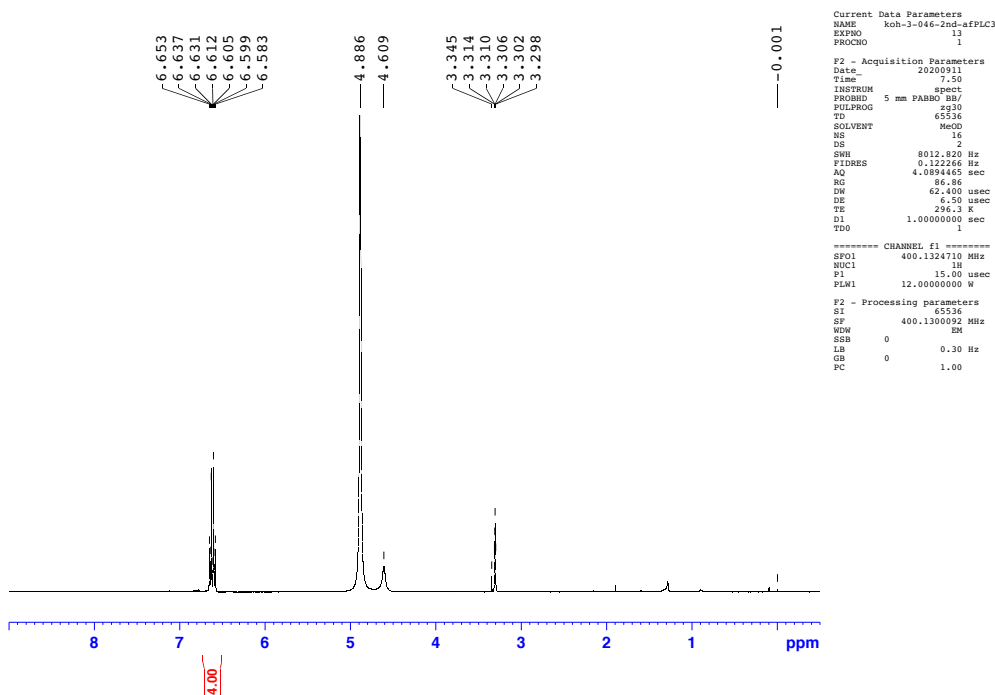

## <sup>13</sup>C NMR

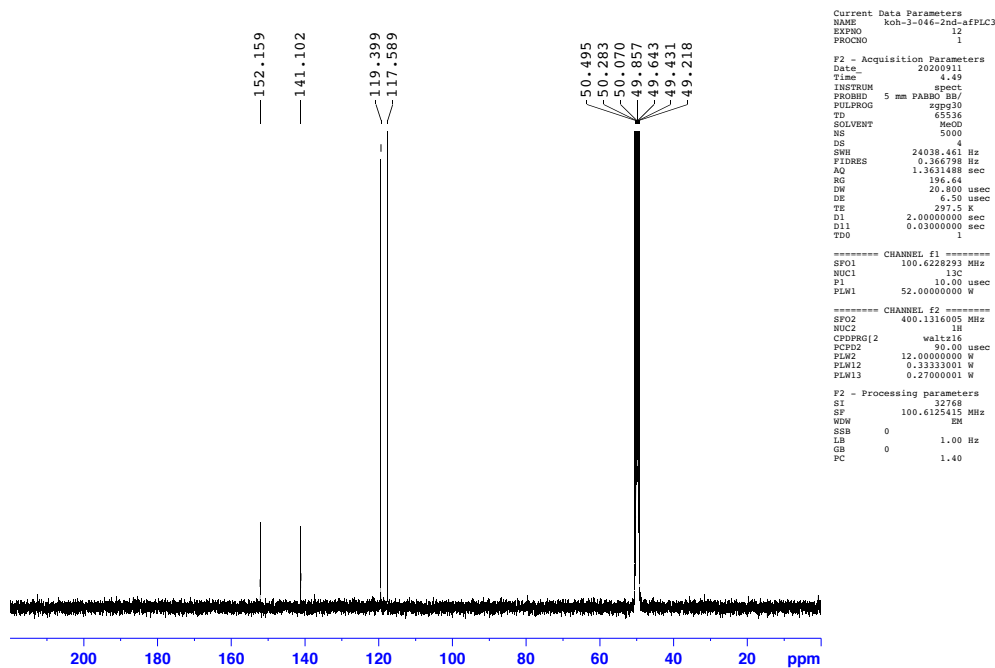

# 4-Methylphenol (2i)

<sup>1</sup>H NMR

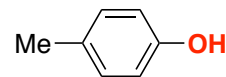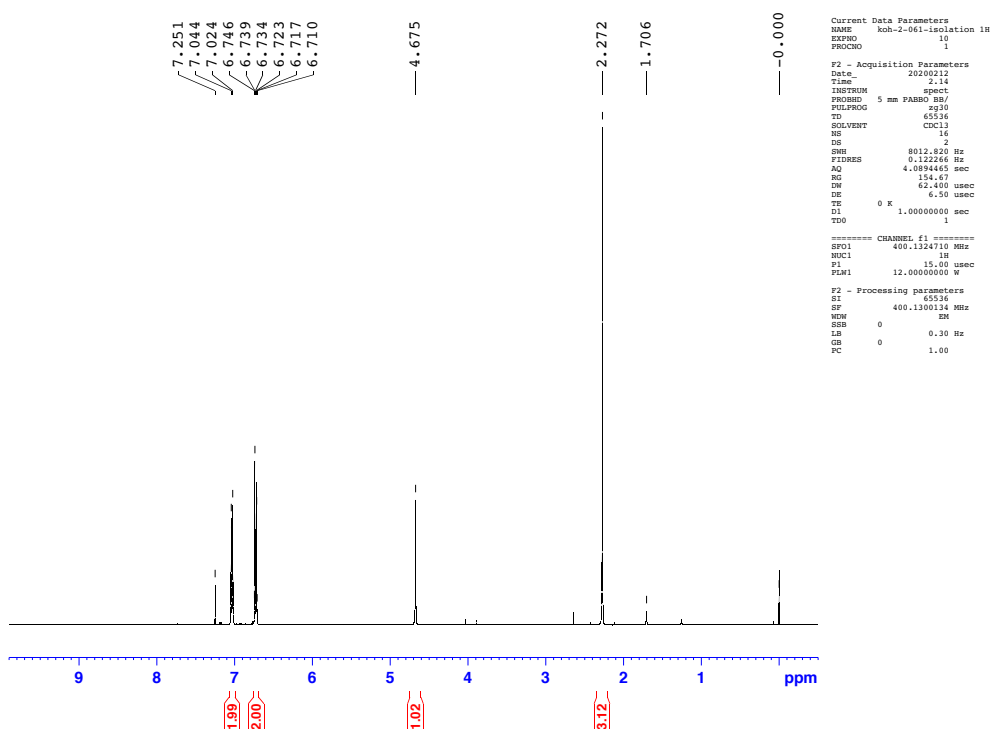

<sup>13</sup>C NMR

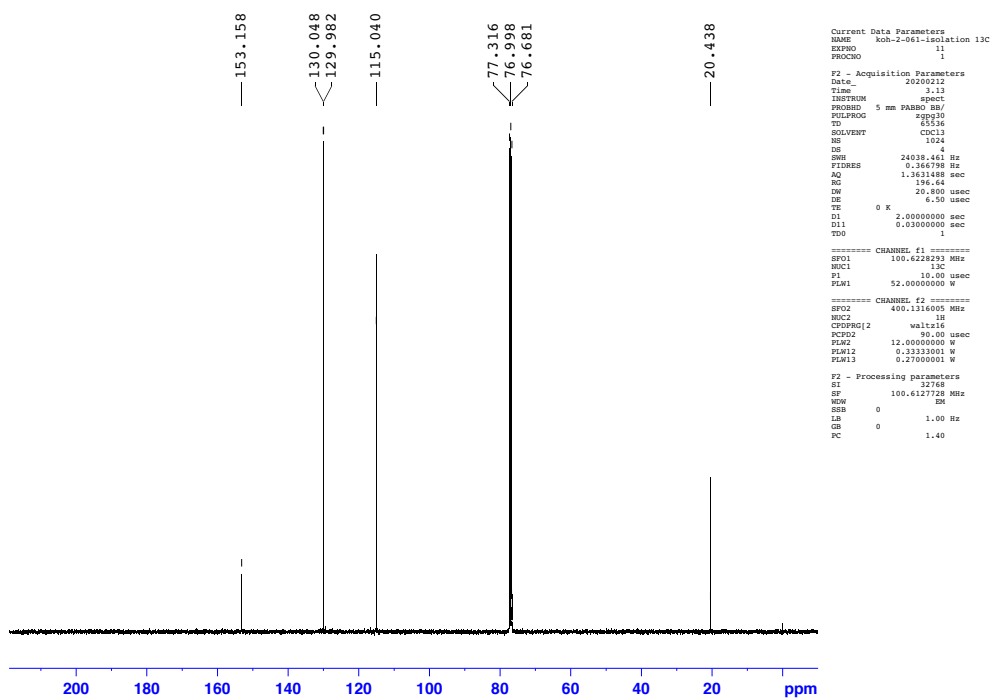

# 4-Fluorophenol (2j)

## <sup>1</sup>H NMR

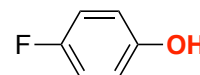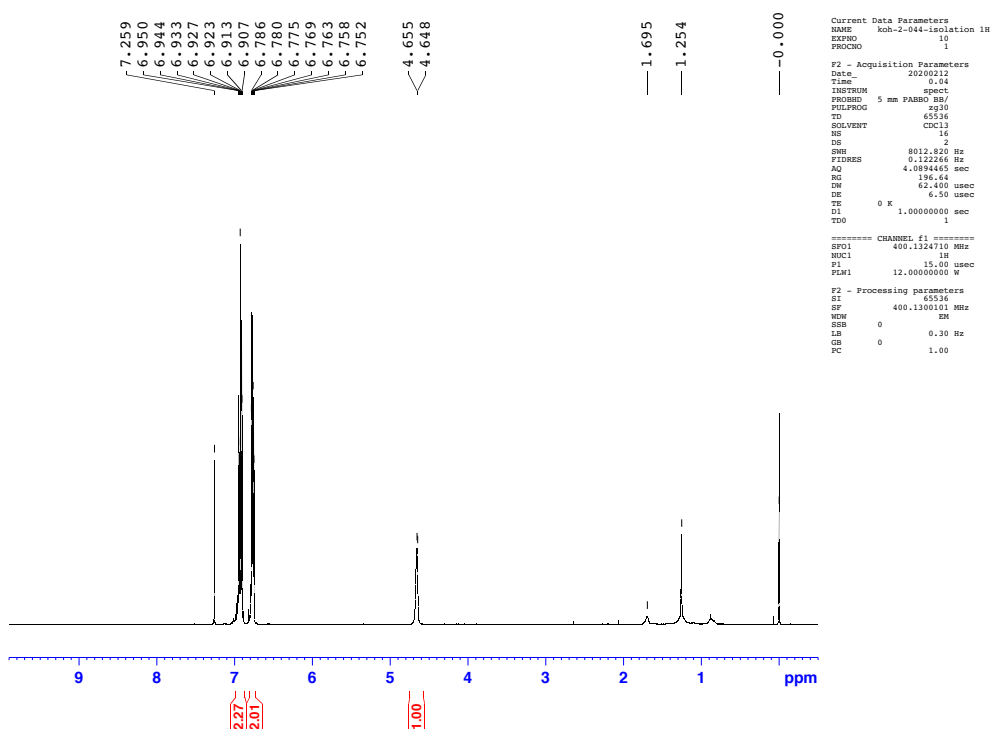

## <sup>13</sup>C NMR

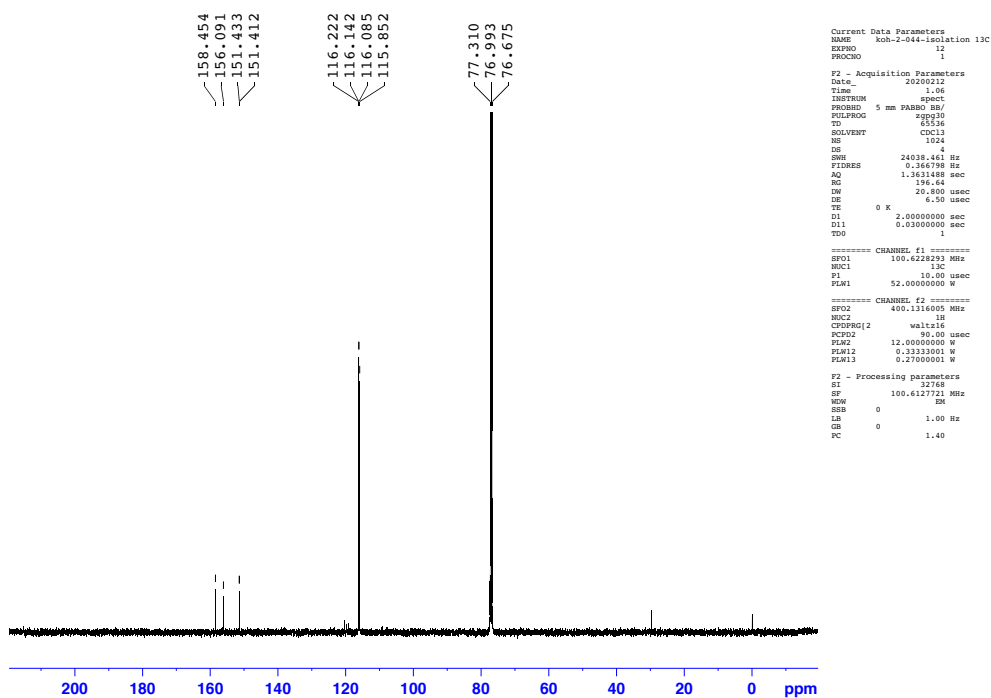



# 4-Chlorophenol (2k)

<sup>1</sup>H NMR

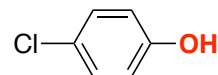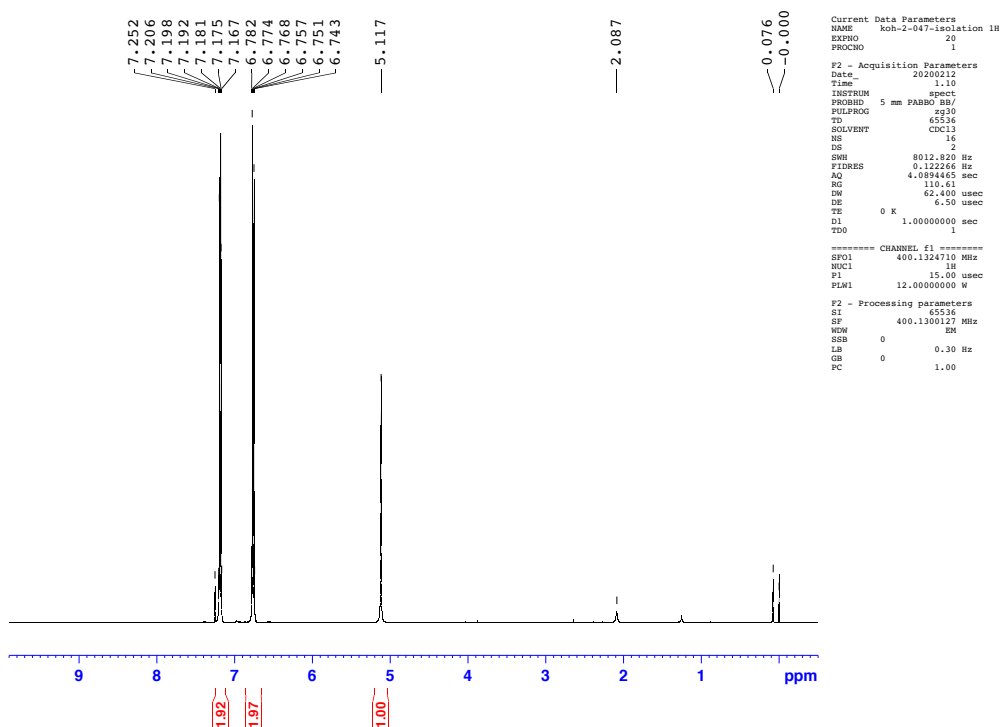

<sup>13</sup>C NMR

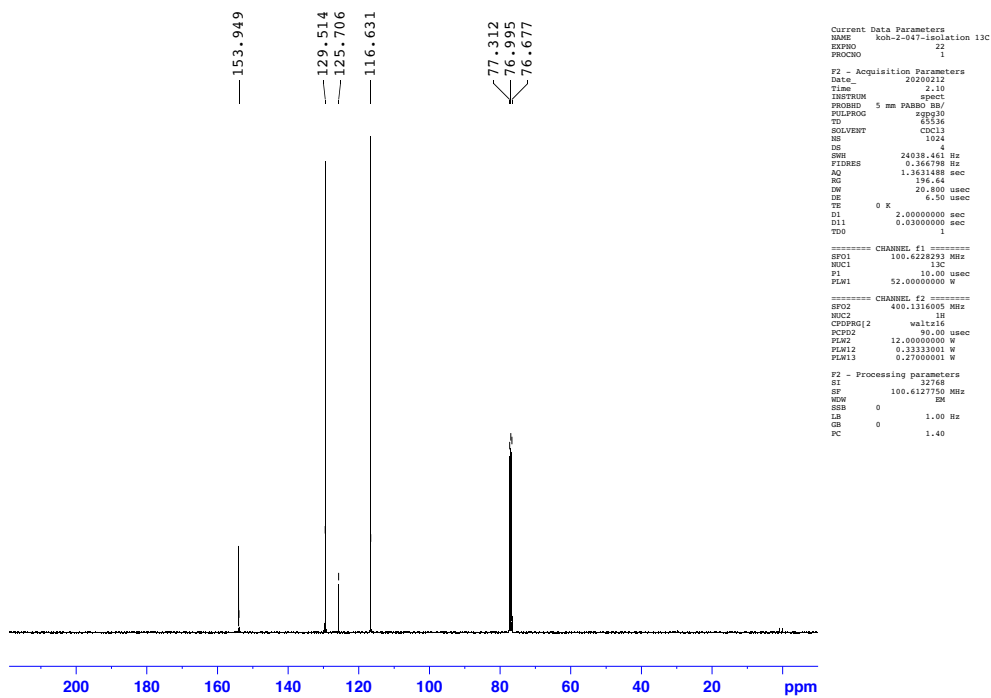

# 3-Chlorophenol (2I)

## <sup>1</sup>H NMR

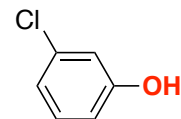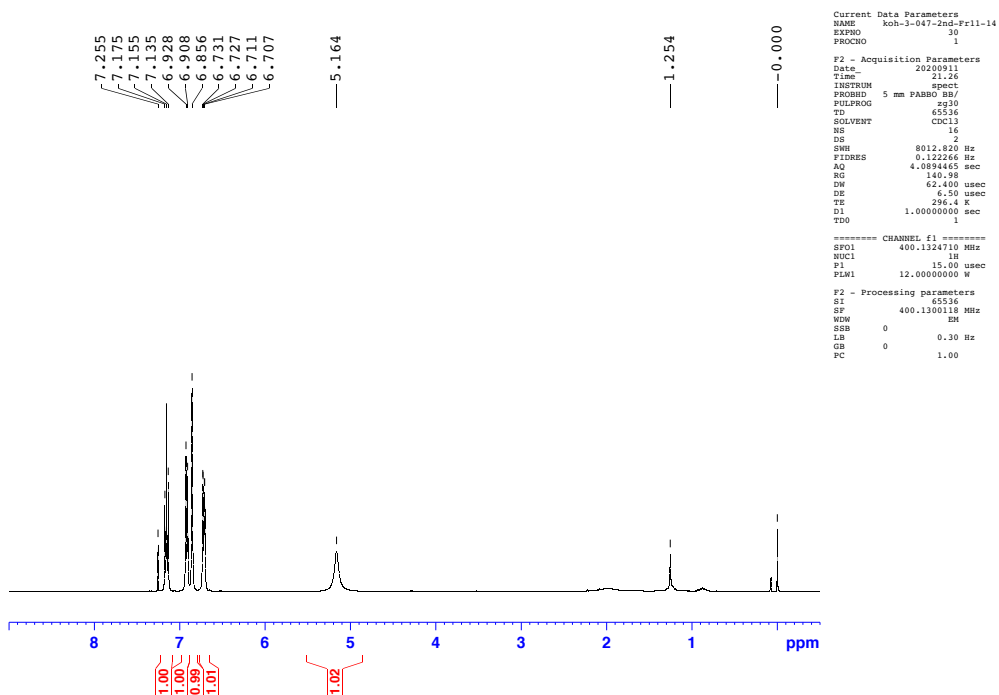

## <sup>13</sup>C NMR

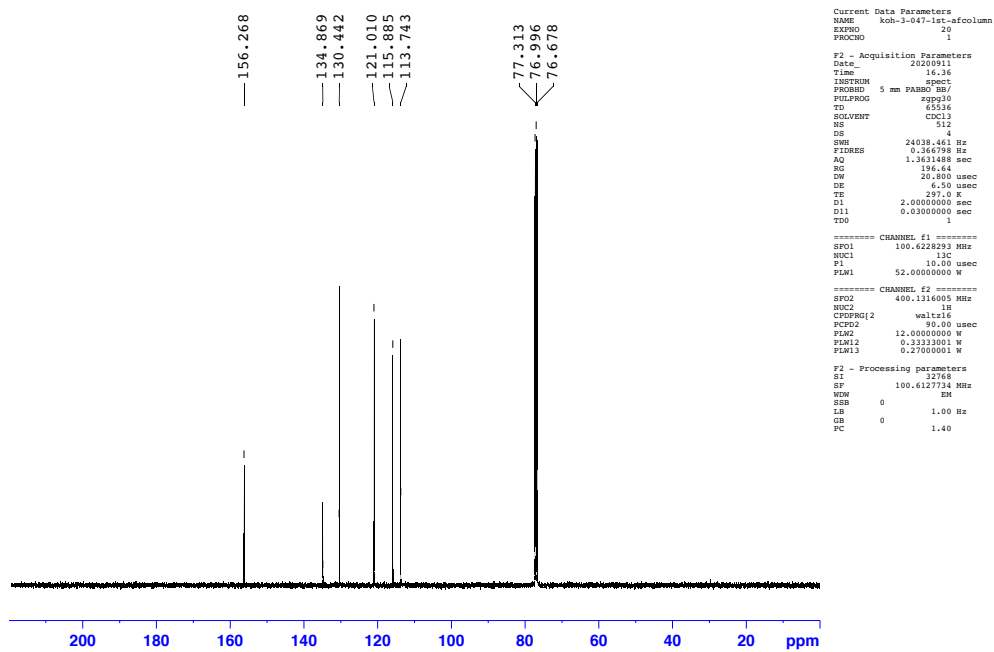

# 3-Hydroxypyridine (2m)

<sup>1</sup>H NMR

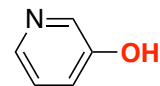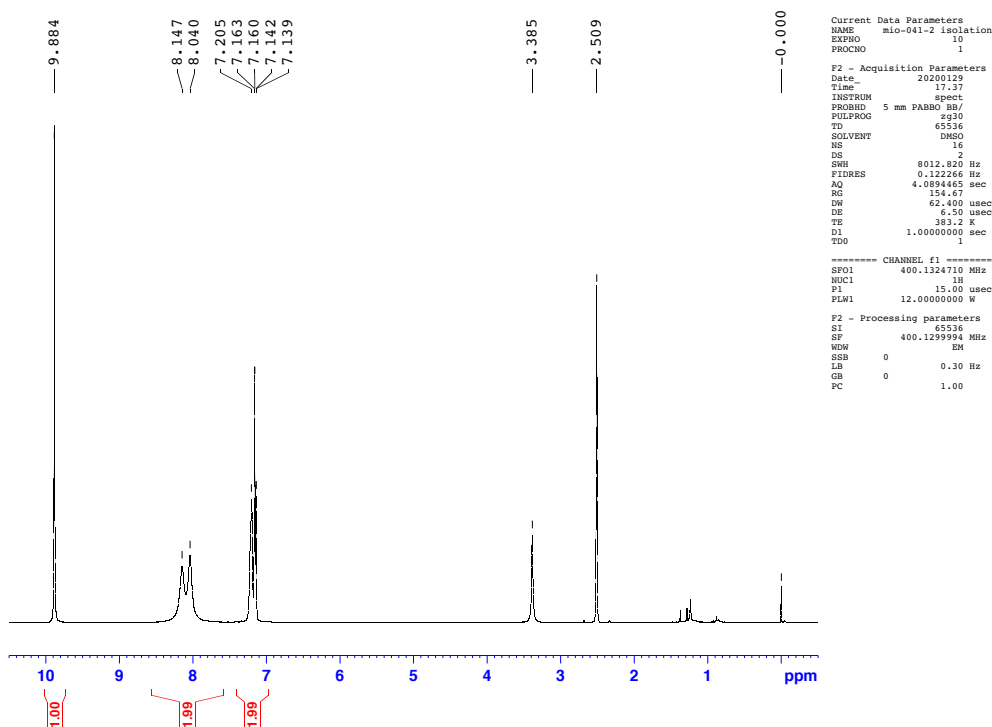

<sup>13</sup>C NMR

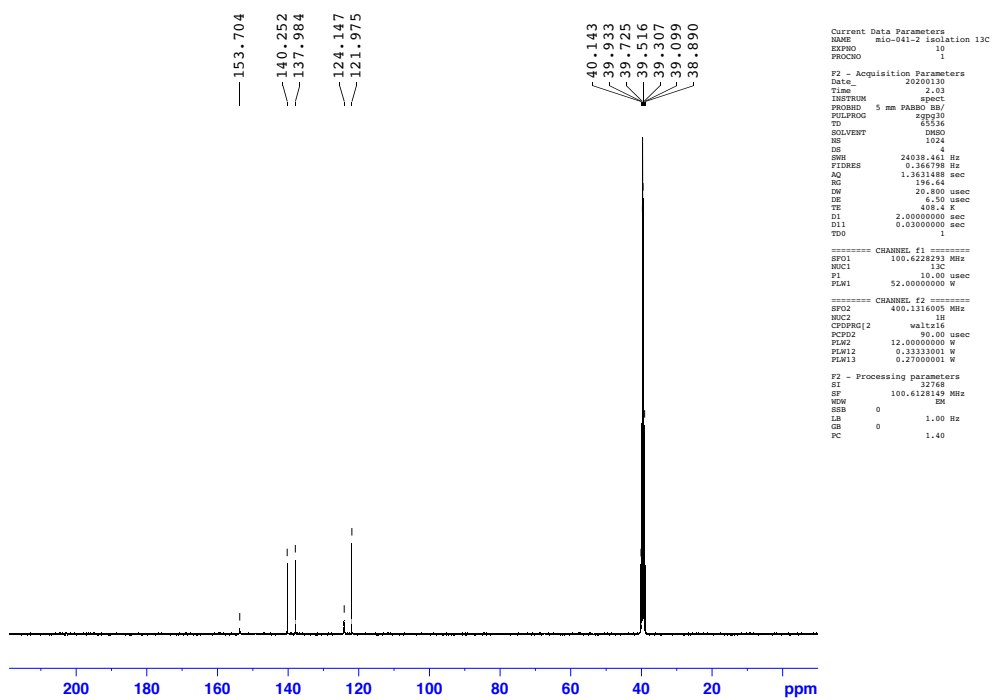

# 5-Hydroxy-2-methoxypyridine (2n)

<sup>1</sup>H NMR

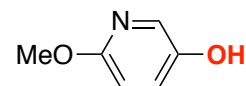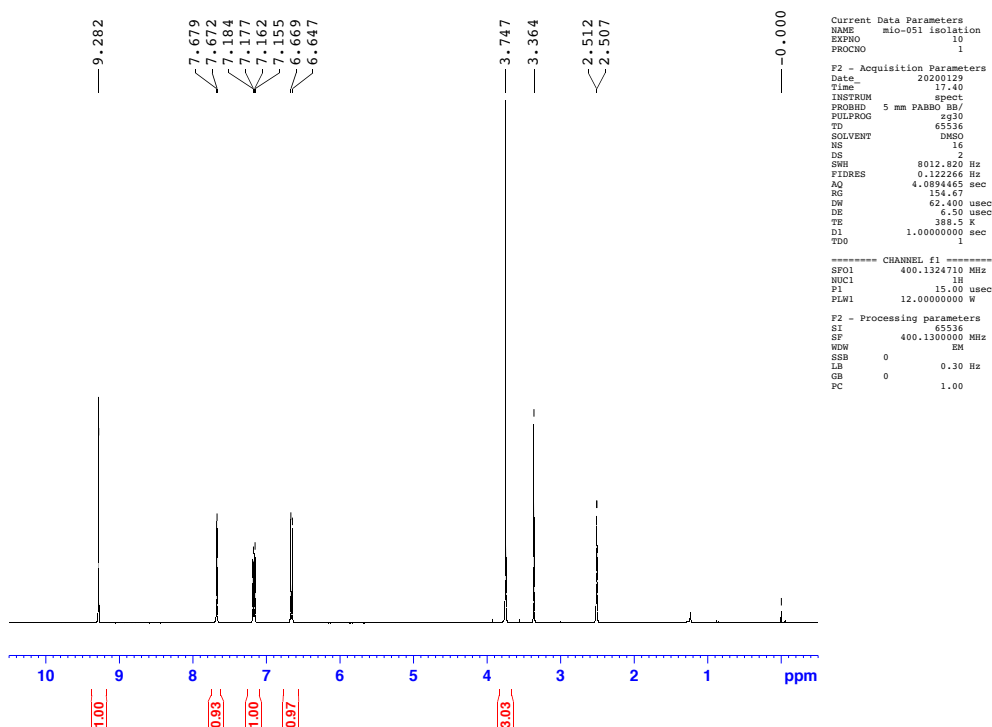

<sup>13</sup>C NMR

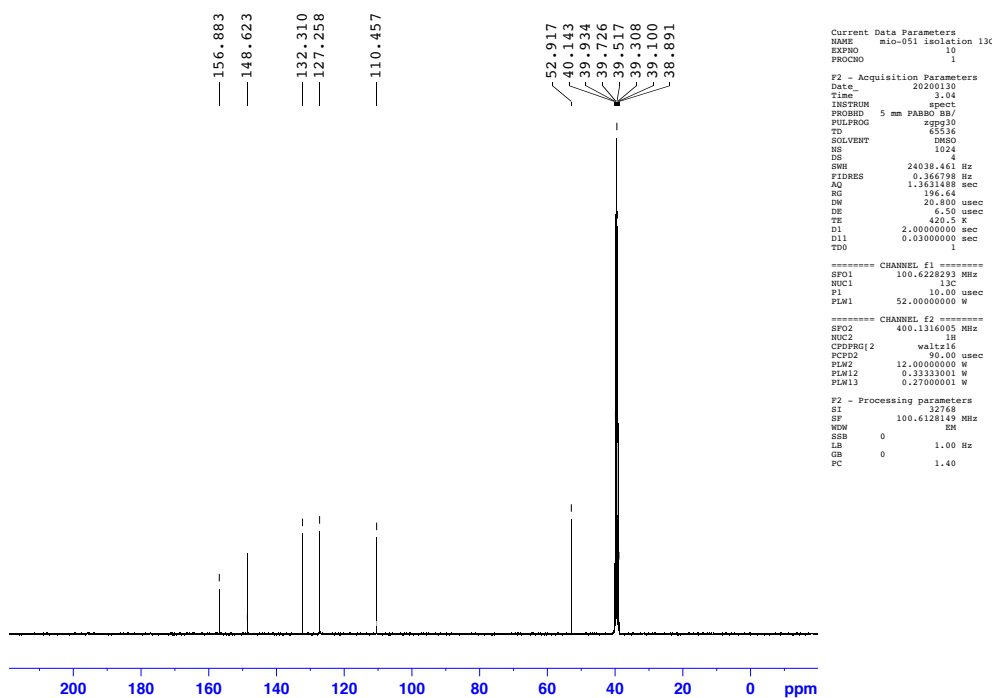

# 3-Hydroxy-2-methoxypyridine (2o)

## <sup>1</sup>H NMR

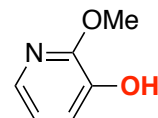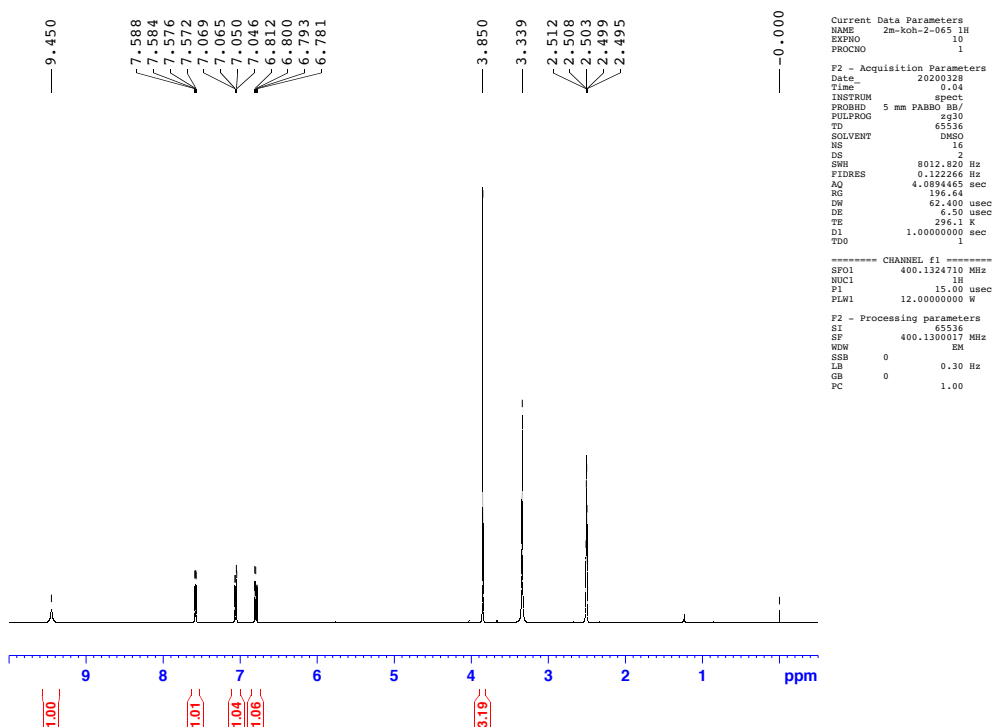

## <sup>13</sup>C NMR

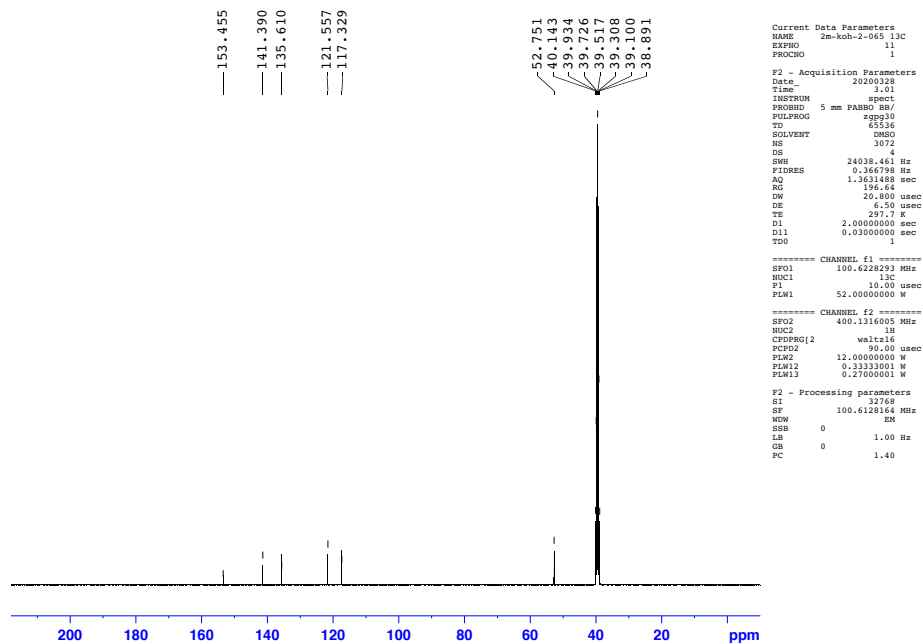

# 2-Fluoro-5-hydroxypyridine (2p)

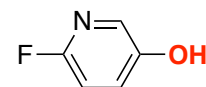

## <sup>1</sup>H NMR

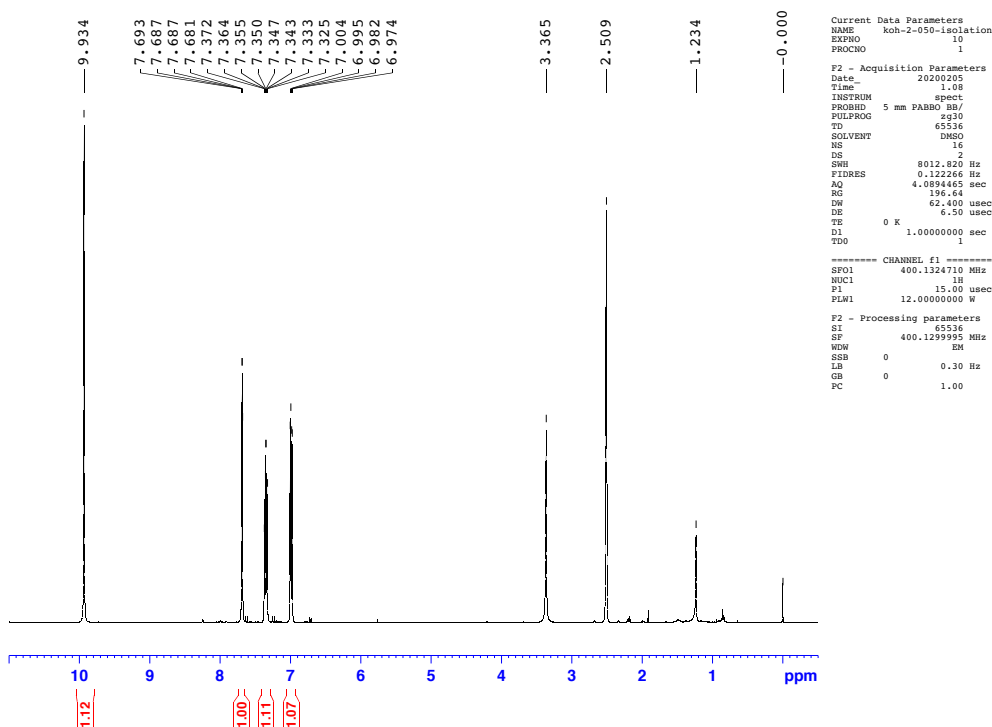

## <sup>13</sup>C NMR

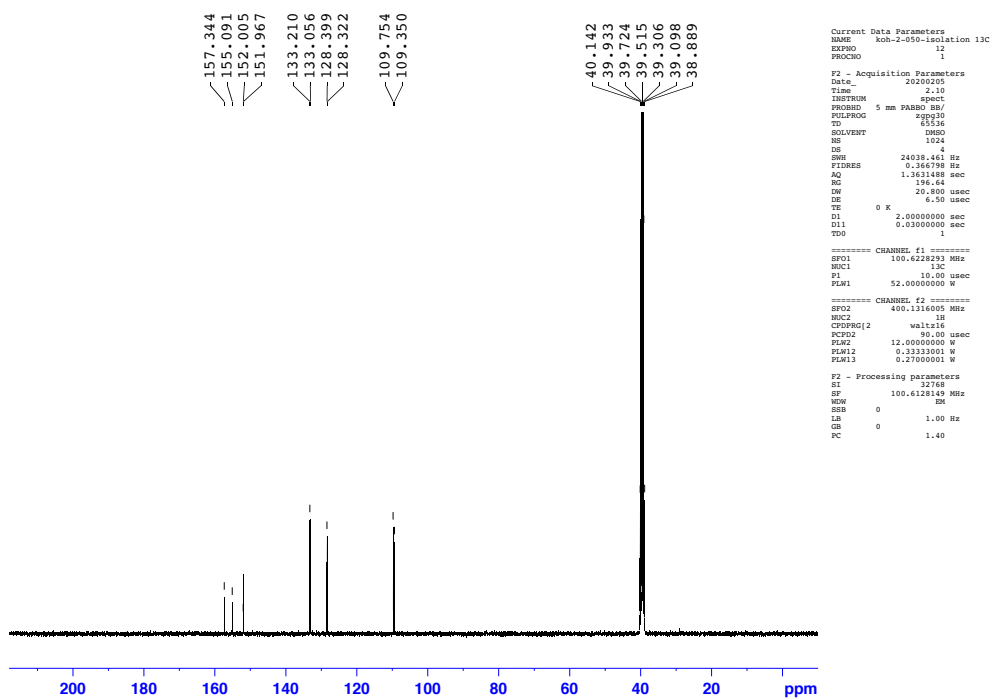

# 2-Fluoro-3-hydroxypyridine (2q)

<sup>1</sup>H NMR

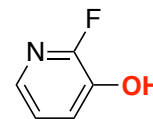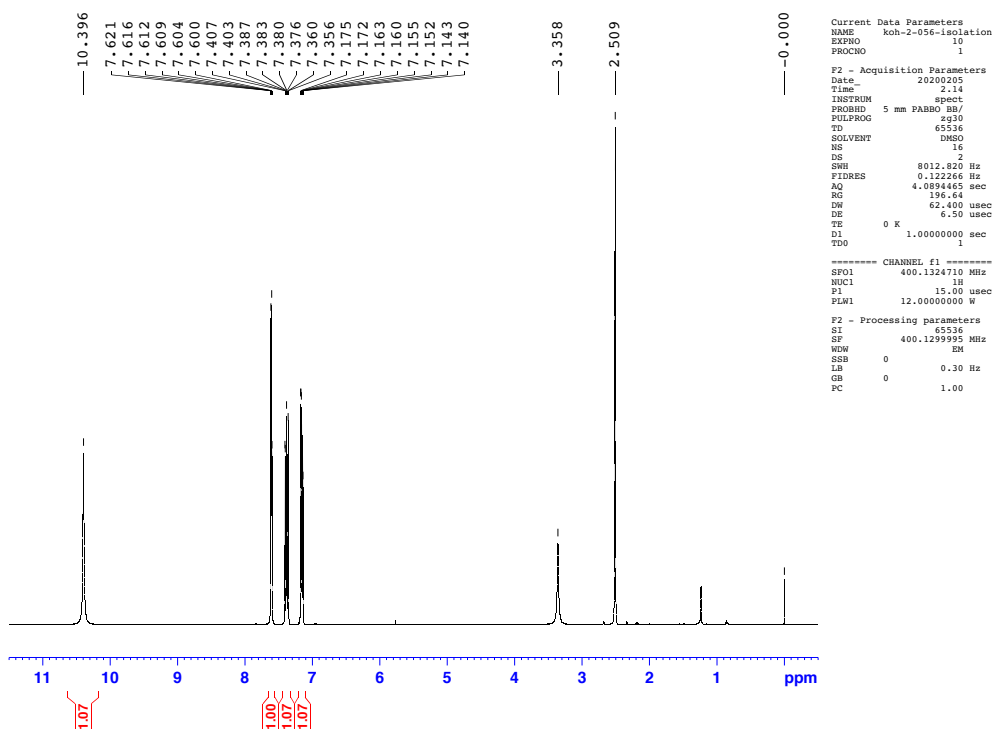

<sup>13</sup>C NMR

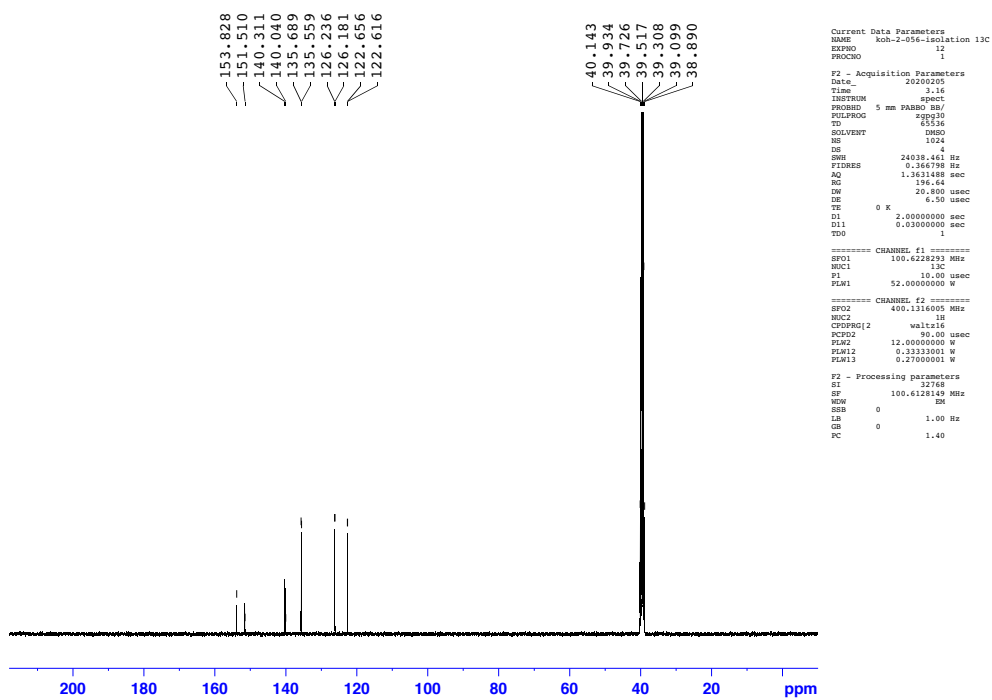

# 6-Hydroxyquinoline (2r)

## <sup>1</sup>H NMR

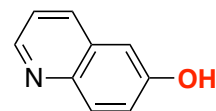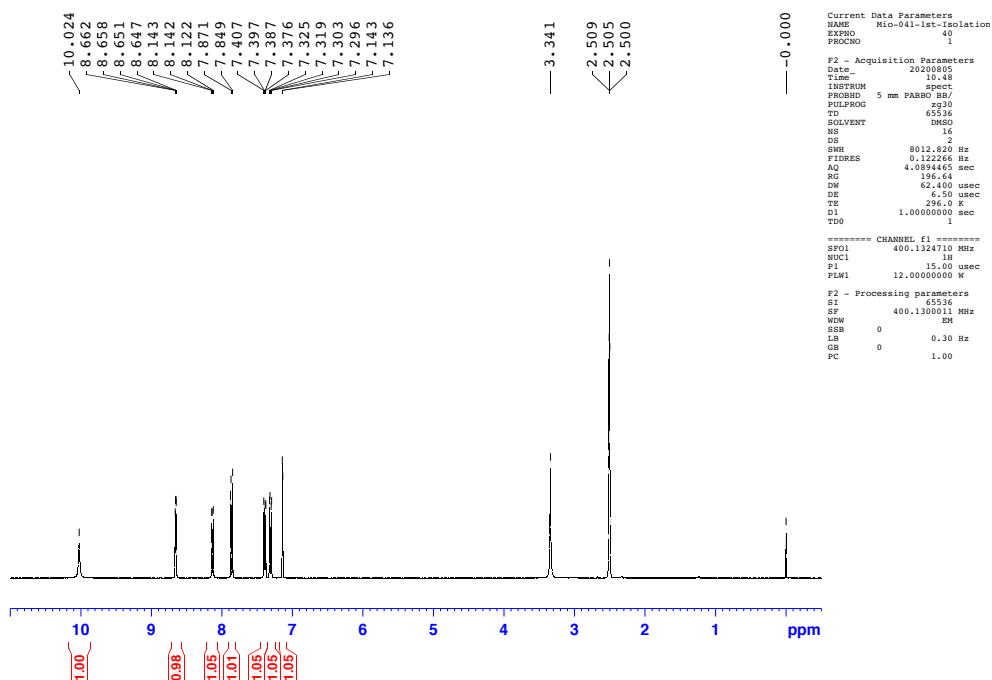

## <sup>13</sup>C NMR

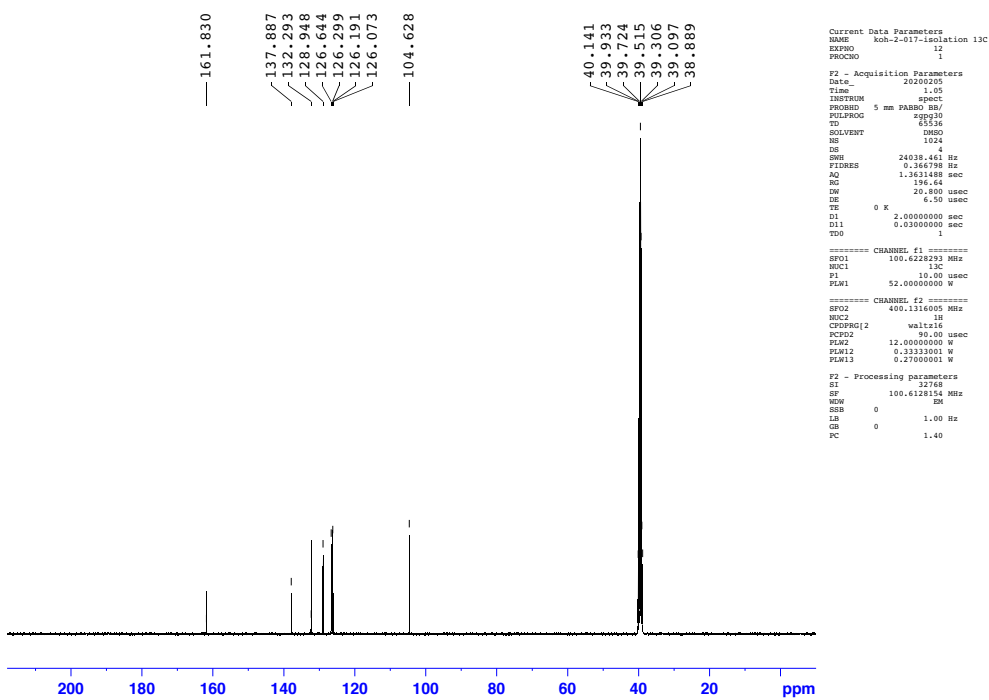



# 1(2H)-Isoquinolinone (2s)

## <sup>1</sup>H NMR

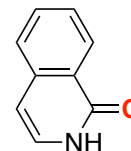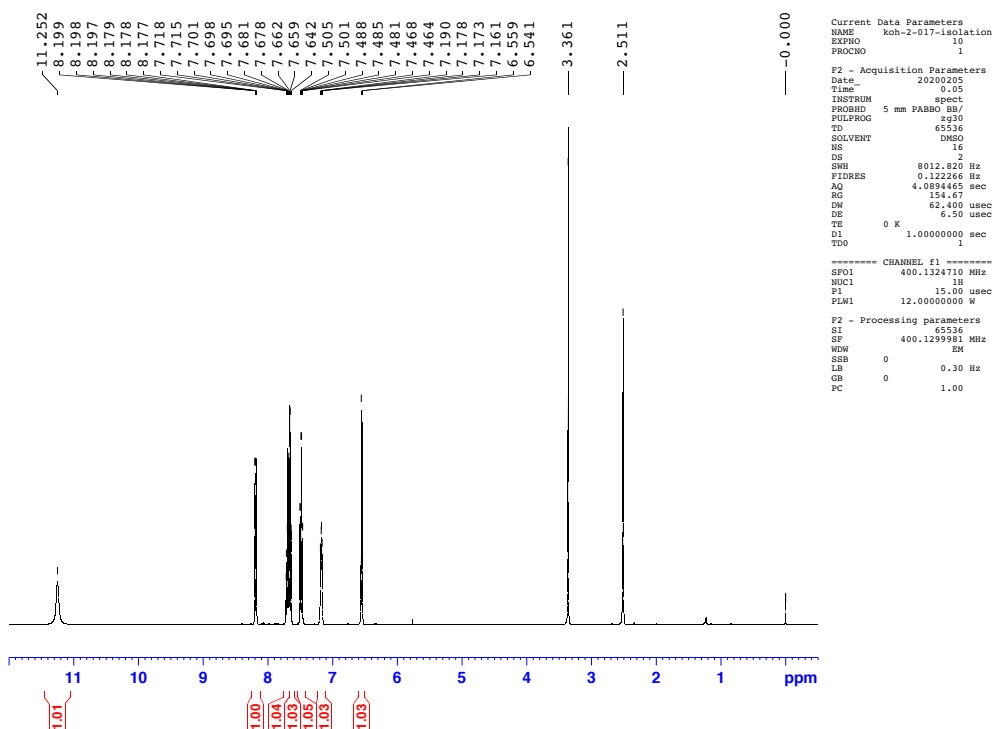

## <sup>13</sup>C NMR

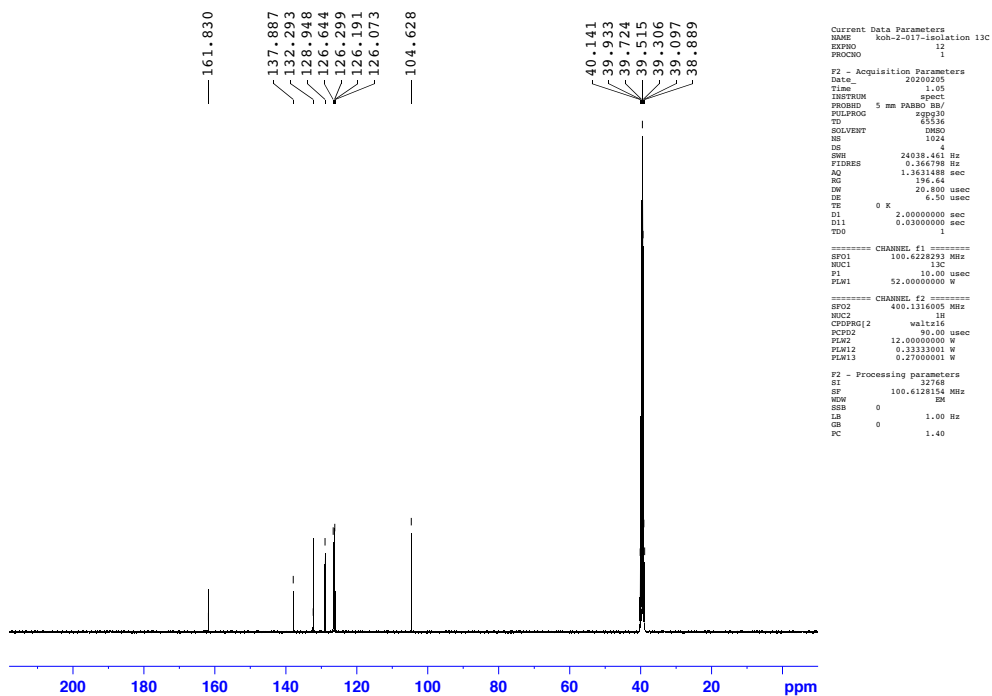

# 1-Methyl-1H-pyrazol-4-ol (2t)

## <sup>1</sup>H NMR

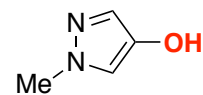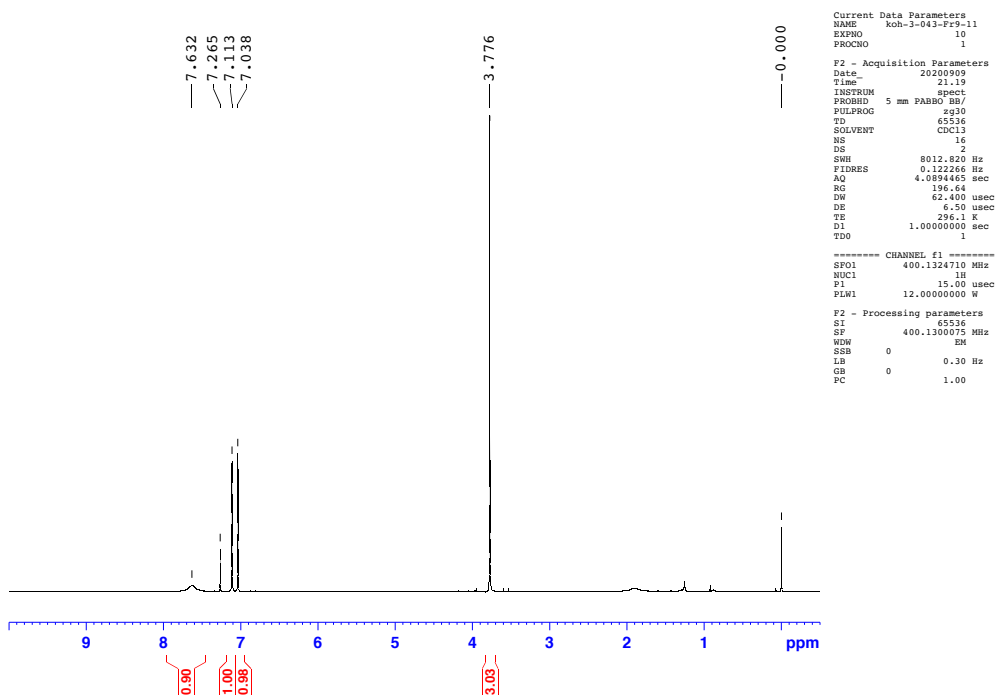

## <sup>13</sup>C NMR

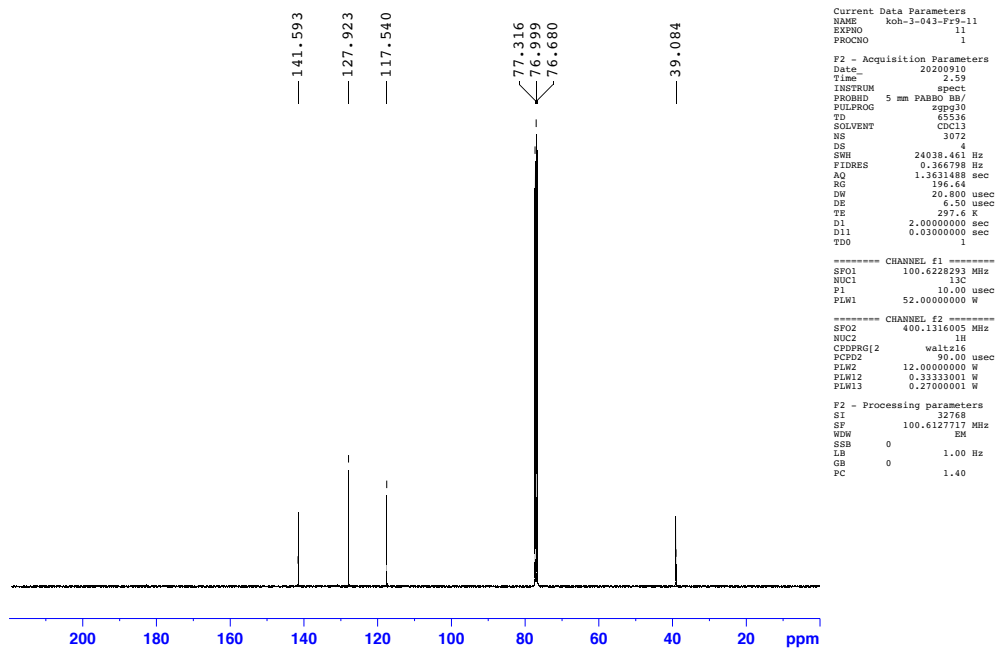

Supplement: d0ob01683g1.pdf [file d0ob01683g1.pdf]
